# Supplementary material for: Contrasting impact of coordination polyhedra and site symmetry on the electronic energy levels in nine-coordinated Eu(iii) and Sm(iii) crystals structures determined from single crystal luminescence spectra
Source: Royal Society of Chemistry journal article supplement (doi:10.1039/d4dt00157e), 2024-01-01
Supplement: d4dt00157e1.pdf [file d4dt00157e1.pdf]

## Supporting Information

Contrasting Impact of Coordination Polyhedra and Site Symmetry on the  
Electronic Energy Levels in Nine-coordinated Eu(III) and Sm(III) Crystals Structures  
Determined from Single Crystal Luminescence Spectra

*Sabina Svava Mortensen, Villads R. M. Nielsen and Thomas Just Sørensen\**

*Department of Chemistry & Nano-Science Center, University of Copenhagen,  
Universitetsparken 5, 2100 København Ø, Denmark. [TJS@chem.ku.dk](mailto:TJS@chem.ku.dk)*

This is the supporting information for the article, showing the additionally measured emission and excitation spectra, time-resolved emission decay profiles, crystallographic information, and PXRD. Additionally, Boltzmann population calculations, Voigt fitting of spectra, and arguments for the population analysis of the emission and excitation spectra resulting in the deconvoluted electronic energy levels for the Sm<sup>3+</sup> systems.

# Table of Contents

|       |                                                                                                                   |     |
|-------|-------------------------------------------------------------------------------------------------------------------|-----|
| 1     | Crystallographic Information .....                                                                                | S4  |
| 1.1   | Eu <sup>3+</sup> Compounds Crystallographic Information .....                                                     | S4  |
| 1.1.1 | Na <sub>3</sub> [Eu(ODA) <sub>3</sub> ]·8H <sub>2</sub> O Experimental and Crystallographic Information .....     | S4  |
| 1.1.2 | Cs <sub>3</sub> [Eu(DPA) <sub>3</sub> ]·9H <sub>2</sub> O Experimental and Crystallographic Information .....     | S7  |
| 1.1.3 | Na[Eu(DOTA)H <sub>2</sub> O]·4H <sub>2</sub> O Experimental and Crystallographic Information .....                | S9  |
| 1.1.4 | Na[Eu(EDTA)(H <sub>2</sub> O) <sub>3</sub> ]·5H <sub>2</sub> O Experimental and Crystallographic Information..... | S12 |
| 1.2   | Sm <sup>3+</sup> Compounds Crystallographic Information .....                                                     | S16 |
| 1.2.1 | Na <sub>3</sub> [Sm(ODA) <sub>3</sub> ]·7H <sub>2</sub> O Experimental and Crystallographic Information .....     | S16 |
| 1.2.2 | Cs <sub>3</sub> [Sm(DPA) <sub>3</sub> ]·9H <sub>2</sub> O Experimental and Crystallographic Information .....     | S19 |
| 1.2.3 | Na[Sm(DOTA)H <sub>2</sub> O]·4H <sub>2</sub> O Experimental and Crystallographic Information .....                | S22 |
| 1.2.4 | Na[Sm(EDTA)(H <sub>2</sub> O) <sub>3</sub> ]·5H <sub>2</sub> O Experimental and Crystallographic Information....  | S25 |
| 2     | Symmetry Deviation Values.....                                                                                    | S28 |
| 2.1   | Symmetry Deviation Values for Ideal Nine-coordinated Structures .....                                             | S28 |
| 2.2   | Symmetry Deviation Values for the Eu <sup>3+</sup> and Sm <sup>3+</sup> Compounds.....                            | S29 |
| 2.2.1 | Symmetry Deviation Values for the Eu <sup>3+</sup> Compounds.....                                                 | S29 |
| 2.2.2 | Symmetry Deviation Values for the Sm <sup>3+</sup> Compounds .....                                                | S31 |
| 3     | PXRD.....                                                                                                         | S33 |
| 3.1   | PXRD Eu <sup>3+</sup> Compounds .....                                                                             | S33 |
| 3.1.1 | Na <sub>3</sub> [Eu(ODA) <sub>3</sub> ]·8H <sub>2</sub> O PXRD.....                                               | S33 |
| 3.1.2 | Cs <sub>3</sub> [Eu(DPA) <sub>3</sub> ]·9H <sub>2</sub> O PXRD.....                                               | S34 |
| 3.1.3 | Na[Eu(DOTA)H <sub>2</sub> O]·4H <sub>2</sub> O PXRD .....                                                         | S35 |
| 3.1.4 | Na[Eu(EDTA)(H <sub>2</sub> O) <sub>3</sub> ]·5H <sub>2</sub> O PXRD .....                                         | S36 |
| 3.2   | PXRD Sm <sup>3+</sup> Compounds .....                                                                             | S37 |
| 3.2.1 | Cs <sub>3</sub> [Sm(DPA) <sub>3</sub> ]·9H <sub>2</sub> O PXRD.....                                               | S37 |
| 3.2.2 | Na[Sm(DOTA)H <sub>2</sub> O]·4H <sub>2</sub> O PXRD.....                                                          | S38 |
| 3.2.3 | Na[Sm(EDTA)H <sub>2</sub> O]·5H <sub>2</sub> O PXRD .....                                                         | S39 |
| 4     | Spectroscopy Data .....                                                                                           | S40 |
| 4.1   | Experimental Setup for Solid State Single Crystal Luminescence.....                                               | S40 |
| 4.2   | Spectroscopy Data for Eu <sup>3+</sup> Compounds .....                                                            | S41 |
| 4.2.1 | Luminescence Lifetimes for Eu <sup>3+</sup> Compounds.....                                                        | S41 |
| 4.2.2 | Na <sub>3</sub> [Eu(ODA) <sub>3</sub> ]·8H <sub>2</sub> O Spectra .....                                           | S42 |

|       |                                                                                                            |     |
|-------|------------------------------------------------------------------------------------------------------------|-----|
| 4.2.3 | Cs <sub>3</sub> [Eu(DPA) <sub>3</sub> ]·9H <sub>2</sub> O Spectra .....                                    | S48 |
| 4.2.4 | Na[Eu(DOTA)H <sub>2</sub> O]·4H <sub>2</sub> O Spectra .....                                               | S54 |
| 4.2.5 | Na[Eu(DOTA)H <sub>2</sub> O]·4H <sub>2</sub> O Excitation Spectra .....                                    | S56 |
| 4.2.6 | Na[Eu(EDTA)(H <sub>2</sub> O) <sub>3</sub> ]·5H <sub>2</sub> O Spectra.....                                | S60 |
| 4.3   | Spectroscopy Data for Sm <sup>3+</sup> Compounds .....                                                     | S66 |
| 4.3.1 | Luminescence Lifetimes for Sm <sup>3+</sup> Compounds .....                                                | S66 |
| 4.3.2 | Na <sub>3</sub> [Sm(ODA) <sub>3</sub> ]·7H <sub>2</sub> O Spectra .....                                    | S67 |
| 4.3.3 | Cs <sub>3</sub> [Sm(DPA) <sub>3</sub> ]·9H <sub>2</sub> O Spectra.....                                     | S69 |
| 4.3.4 | Na[Sm(DOTA)H <sub>2</sub> O]·4H <sub>2</sub> O Spectra.....                                                | S72 |
| 4.3.5 | Na[Sm(EDTA)(H <sub>2</sub> O) <sub>3</sub> ]·5H <sub>2</sub> O Spectra .....                               | S75 |
| 5     | Deconvolution of the Electronic Energies using Voigt fitting and Boltzmann Population Analysis.....        | S78 |
| 5.1   | Fits for Na[Sm(DOTA)H <sub>2</sub> O]·4H <sub>2</sub> O.....                                               | S78 |
| 5.1.1 | Boltzmann Population Calculations for Na[Sm(EDTA)(H <sub>2</sub> O) <sub>3</sub> ]·5H <sub>2</sub> O ..... | S83 |
| 5.2   | Boltzmann Population Analysis for Na[Sm(EDTA)(H <sub>2</sub> O) <sub>3</sub> ]·5H <sub>2</sub> O .....     | S84 |
| 5.2.1 | Voight Fitting for Na[Sm(EDTA)(H <sub>2</sub> O) <sub>3</sub> ]·5H <sub>2</sub> O.....                     | S84 |
| 5.3   | Boltzmann Population Analysis for Na <sub>3</sub> [Sm(ODA) <sub>3</sub> ]·7H <sub>2</sub> O.....           | S88 |
| 5.4   | Boltzmann Population Analysis for Cs <sub>3</sub> [Sm(DPA) <sub>3</sub> ]·9H <sub>2</sub> O .....          | S93 |
| 5.5   | Electronic Energy Levels for the Sm <sup>3+</sup> Compounds.....                                           | S98 |
| 6     | References .....                                                                                           | S98 |

# 1 Crystallographic Information

## 1.1 $\text{Eu}^{3+}$ Compounds Crystallographic Information

### 1.1.1 $\text{Na}_3[\text{Eu}(\text{ODA})_3] \cdot 8\text{H}_2\text{O}$ Experimental and Crystallographic Information

#### 1.1.1.1 Picture of $\text{Na}_3[\text{Eu}(\text{ODA})_3] \cdot 8\text{H}_2\text{O}$ Crystals

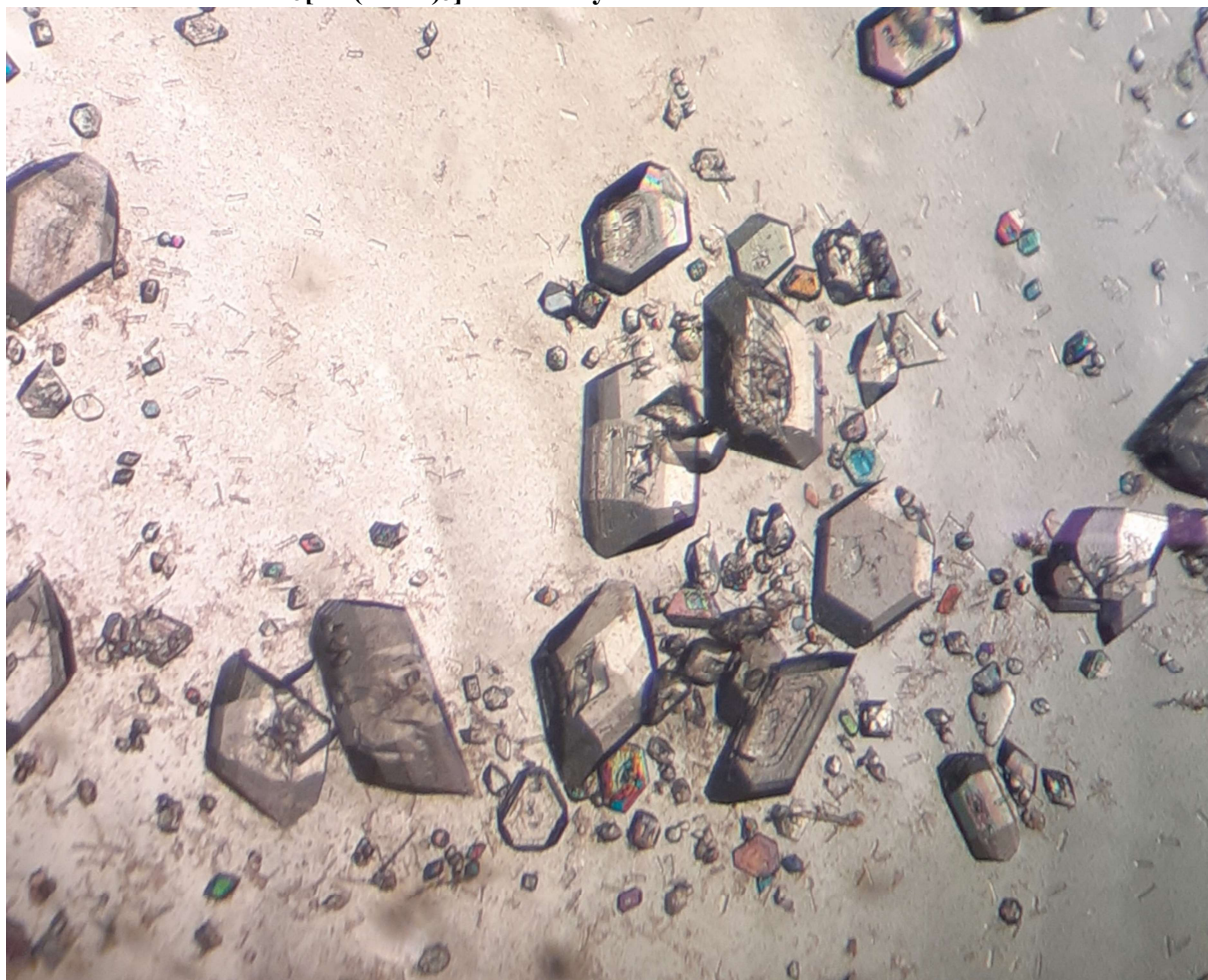

**Figure S 1:** Pictures of  $\text{Na}_3[\text{Eu}(\text{ODA})_3] \cdot 8\text{H}_2\text{O}$  made following the description in the experimental section. The crystals have a difference in size, but all of the crystal were found to be clear, light, and colourless with a prism structure. All crystals were observed to have the same phase. The complex crystallises in the monoclinic  $C2/c$  space group.

### 1.1.1.2 Na<sub>3</sub>[Eu(ODA)<sub>3</sub>]·8H<sub>2</sub>O Crystal Structure

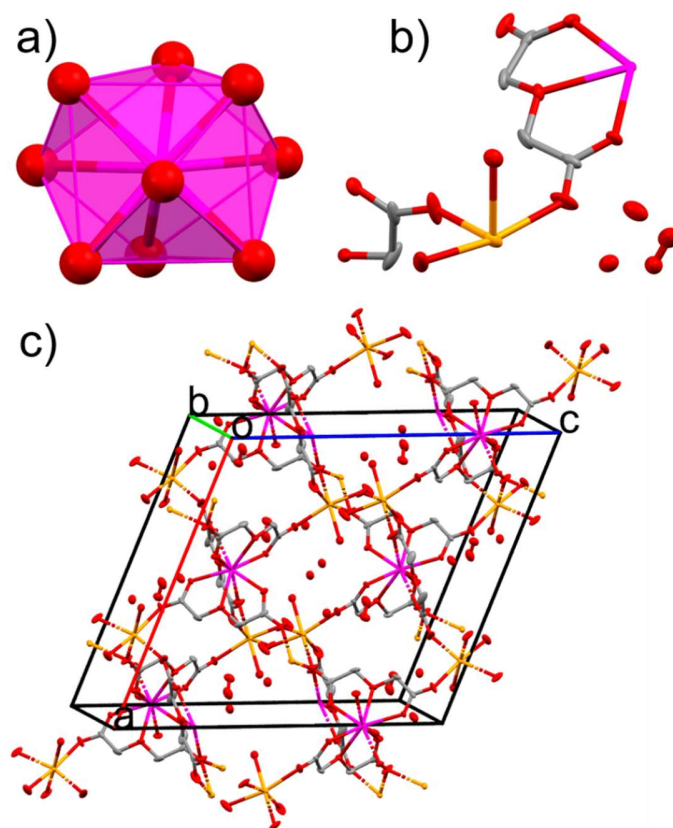

**Figure S 2:** **a)** Polyhedral depicting coordination around the Eu<sup>3+</sup> ion in Na<sub>3</sub>[Eu(ODA)<sub>3</sub>]·8H<sub>2</sub>O. **b)** The asymmetric unit for Na<sub>3</sub>[Eu(ODA)<sub>3</sub>]·8H<sub>2</sub>O. **c)** The unit cell for Na<sub>3</sub>[Eu(ODA)<sub>3</sub>]·8H<sub>2</sub>O. Colour code: Eu = pink, N = light blue, C = blue, O = red and Na = orange. Hydrogen atoms omitted for clarity. Thermal ellipsoids are 50% probability.

### 1.1.1.3 Na<sub>3</sub>[Eu(ODA)<sub>3</sub>]·8H<sub>2</sub>O Crystallographic Information

**Table S 1:** Crystal data and structure refinement for Na<sub>3</sub>[Eu(ODA)<sub>3</sub>]·8H<sub>2</sub>O.

| Crystal data      |                                                                   |
|-------------------|-------------------------------------------------------------------|
| Empirical formula | C <sub>12</sub> H <sub>27</sub> EuNa <sub>3</sub> O <sub>23</sub> |
| Formula weight    | 760.26                                                            |
| Temperature/K     | 120                                                               |
| Crystal system    | monoclinic                                                        |
| Space group       | C2/c                                                              |
| a/Å               | 17.520(3)                                                         |

|                                  |                                     |
|----------------------------------|-------------------------------------|
| b/Å                              | 8.3804(13)                          |
| c/Å                              | 19.059(3)                           |
| $\alpha$ /°                      | 90                                  |
| $\beta$ /°                       | 111.350(4)                          |
| $\gamma$ /°                      | 90                                  |
| Volume/Å <sup>3</sup>            | 2606.2(7)                           |
| Z                                | 4                                   |
| $\rho_{\text{calc}}/\text{cm}^3$ | 1.922                               |
| $\mu/\text{mm}^{-1}$             | 2.555                               |
| F(000)                           | 1492.0                              |
| Crystal size/mm <sup>3</sup>     | 0.18 × 0.174 × 0.11                 |
| Radiation                        | MoK $\alpha$ ( $\lambda$ = 0.71073) |

#### Data collection

---

|                                        |                                                                |
|----------------------------------------|----------------------------------------------------------------|
| 2 $\Theta$ range for data collection/° | 4.59 to 63.012                                                 |
| Index ranges                           | -25 ≤ h ≤ 25, -12 ≤ k ≤ 12, -27 ≤ l ≤ 28                       |
| Reflections collected                  | 29301                                                          |
| Independent reflections                | 4349 [ $R_{\text{int}}$ = 0.0518, $R_{\text{sigma}}$ = 0.0301] |

#### Refinement

---

|                                             |                                 |
|---------------------------------------------|---------------------------------|
| Data/restraints/parameters                  | 4349/6/202                      |
| Goodness-of-fit on F <sup>2</sup>           | 1.297                           |
| Final R indexes [ $I \geq 2\sigma(I)$ ]     | $R_1$ = 0.0378, $wR_2$ = 0.1082 |
| Final R indexes [all data]                  | $R_1$ = 0.0388, $wR_2$ = 0.1086 |
| Largest diff. peak/hole / e Å <sup>-3</sup> | 2.58/-3.37                      |

---

## 1.1.2 $\text{Cs}_3[\text{Eu}(\text{DPA})_3] \cdot 9\text{H}_2\text{O}$ Experimental and Crystallographic Information

### 1.1.2.1 Picture of $\text{Cs}_3[\text{Eu}(\text{DPA})_3] \cdot 9\text{H}_2\text{O}$ Crystals

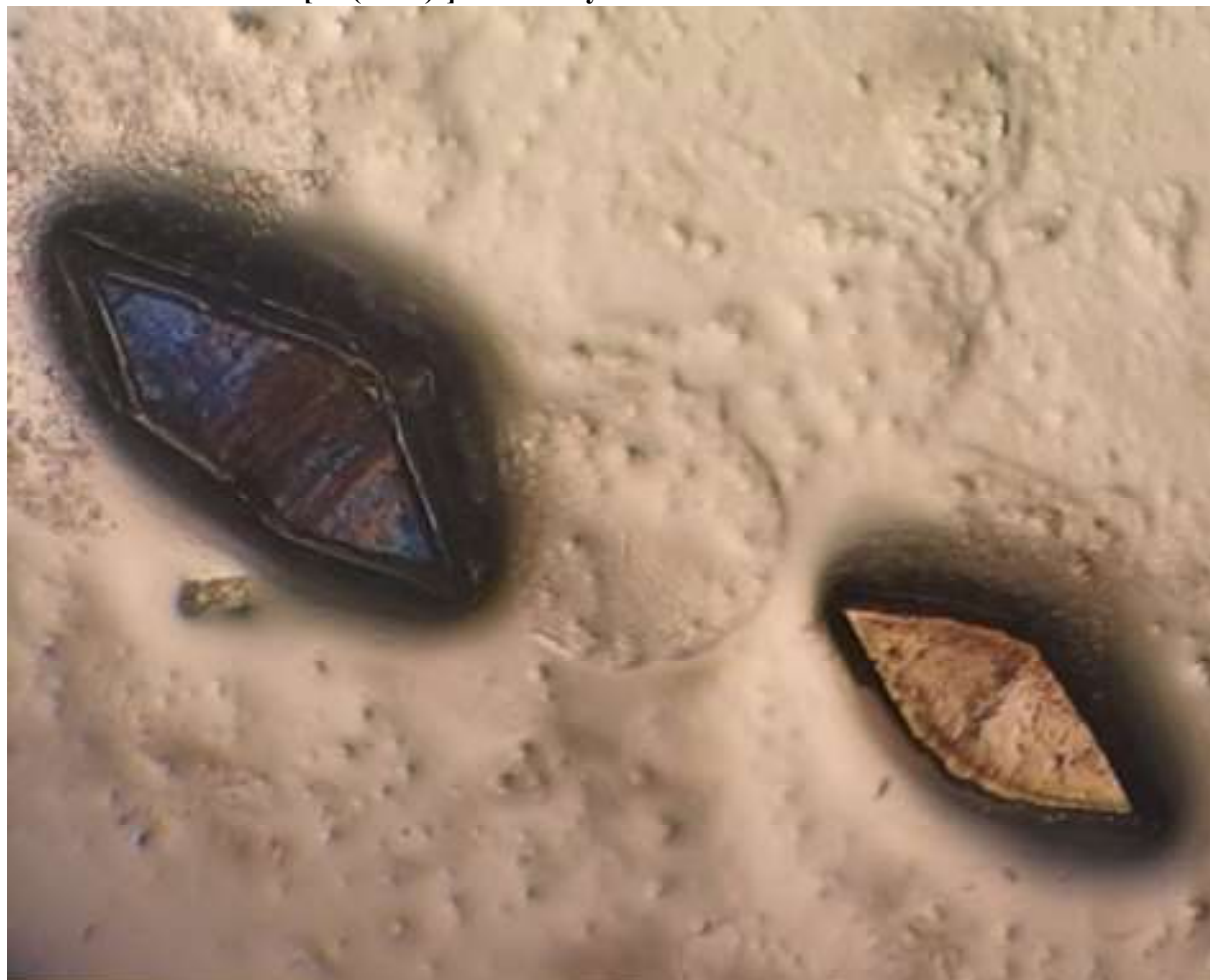

**Figure S 3:** Pictures of  $\text{Cs}_3[\text{Eu}(\text{DPA})_3] \cdot 9\text{H}_2\text{O}$  made following the description in the experimental section. The crystals have a difference in size, but all of the crystal were found to be clear, light, and colourless with a prism structure. All crystals were observed to have the same phase. The complex crystallises in the orthorhombic  $C222_1$  space group.

### 1.1.2.2 $\text{Cs}_3[\text{Eu}(\text{DPA})_3] \cdot 9\text{H}_2\text{O}$ Crystal Structure

The crystal created in the experimental section was found to be a twin, and the structure could not be determined. However, the Bravais lattice and unit cell was found to agree with the previously reported structure by by Brayshaw *et al.*<sup>1</sup> and the crystal was then used for single crystal luminescence measurements.

### 1.1.2.3 Cs<sub>3</sub>[Eu(DPA)<sub>3</sub>]·9H<sub>2</sub>O Crystallographic Information

Table S 2: Crystal data and structure refinement for Cs<sub>3</sub>[Eu(DPA)<sub>3</sub>]·9H<sub>2</sub>O.

| <b>Crystal data</b>                |                                                                                  |
|------------------------------------|----------------------------------------------------------------------------------|
| Empirical formula                  | C <sub>20</sub> Cs <sub>2</sub> EuN <sub>3</sub> Na <sub>2</sub> O <sub>21</sub> |
| Formula weight                     | 1081.99                                                                          |
| Temperature/K                      | 296.15                                                                           |
| Crystal system                     | orthorhombic                                                                     |
| Space group                        | C222 <sub>1</sub>                                                                |
| a/Å                                | 18.0233(9)                                                                       |
| b/Å                                | 10.0116(5)                                                                       |
| c/Å                                | 18.5298(9)                                                                       |
| α/°                                | 90                                                                               |
| β/°                                | 90                                                                               |
| γ/°                                | 90                                                                               |
| Volume/Å <sup>3</sup>              | 3343.6(3)                                                                        |
| Z                                  | 4                                                                                |
| ρ <sub>calc</sub> /cm <sup>3</sup> | 2.149                                                                            |
| μ/mm <sup>-1</sup>                 | 4.135                                                                            |
| F(000)                             | 2016.0                                                                           |
| Crystal size/mm <sup>3</sup>       | ? × ? × ?                                                                        |
| Radiation                          | MoKα (λ = 0.71073)                                                               |
| <b>Refinement</b>                  |                                                                                  |
| 2θ range for data collection/°     | 4.396 to 51.34                                                                   |
| Index ranges                       | -21 ≤ h ≤ 21, -12 ≤ k ≤ 12, -21 ≤ l ≤ 22                                         |
| Reflections collected              | 18157                                                                            |
| Independent reflections            | 3175 [R <sub>int</sub> = 0.0319, R <sub>sigma</sub> = 0.0226]                    |



### 1.1.3 Na[Eu(DOTA)H<sub>2</sub>O]·4H<sub>2</sub>O Experimental and Crystallographic Information

#### 1.1.3.1 Picture of Na[Eu(DOTA)H<sub>2</sub>O]·4H<sub>2</sub>O Crystals

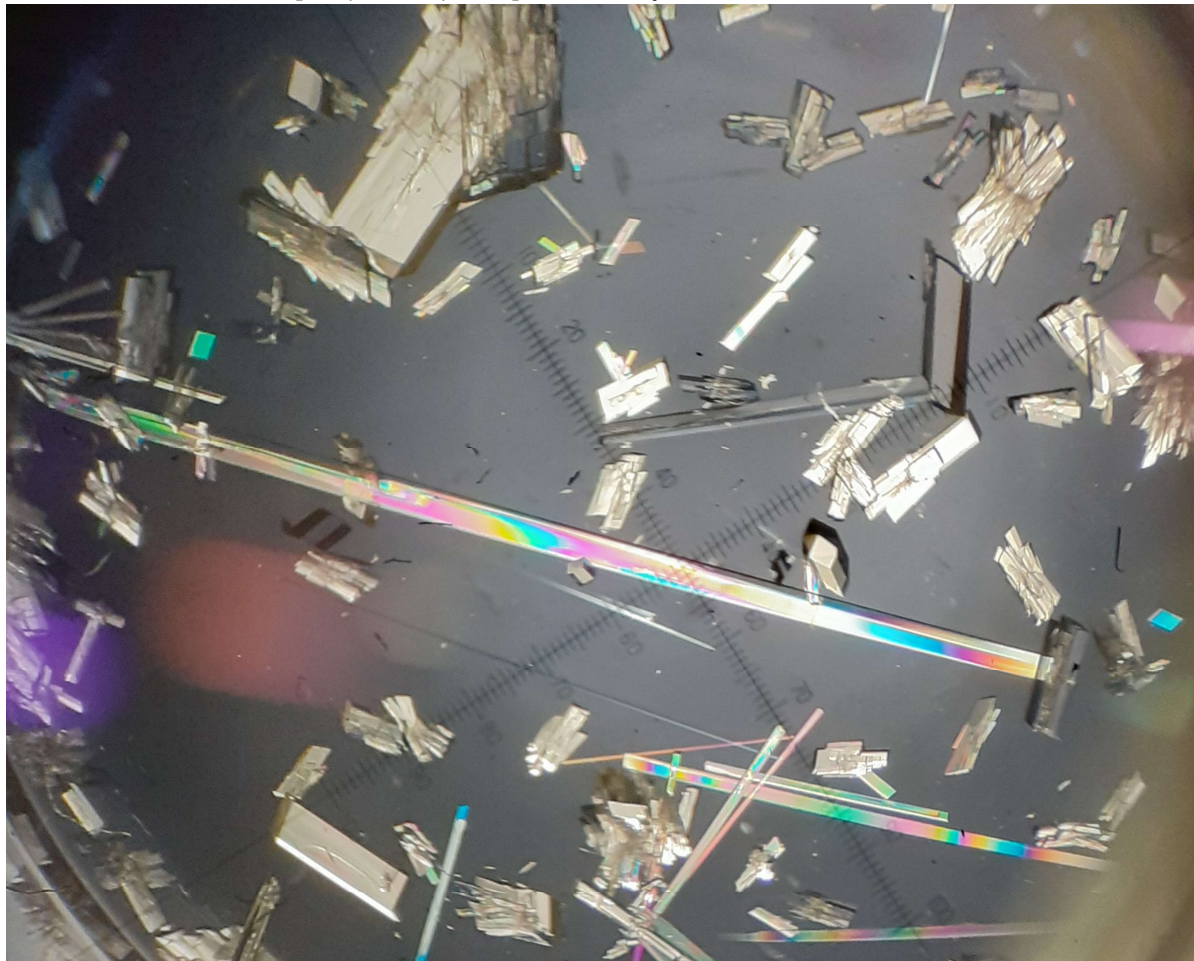

**Figure S 4:** Pictures of Na[Eu(DOTA)H<sub>2</sub>O]·4H<sub>2</sub>O made following the description in the experimental section. The crystals have a difference in size, but all of the crystal were found to be clear, light, and colourless with a prism structure. All crystals were observed to have the same phase. The complex crystallises in the triclinic  $P\bar{1}$  space group.

### 1.1.3.2 Na[Eu(DOTA)H<sub>2</sub>O]·4H<sub>2</sub>O Crystal Structure

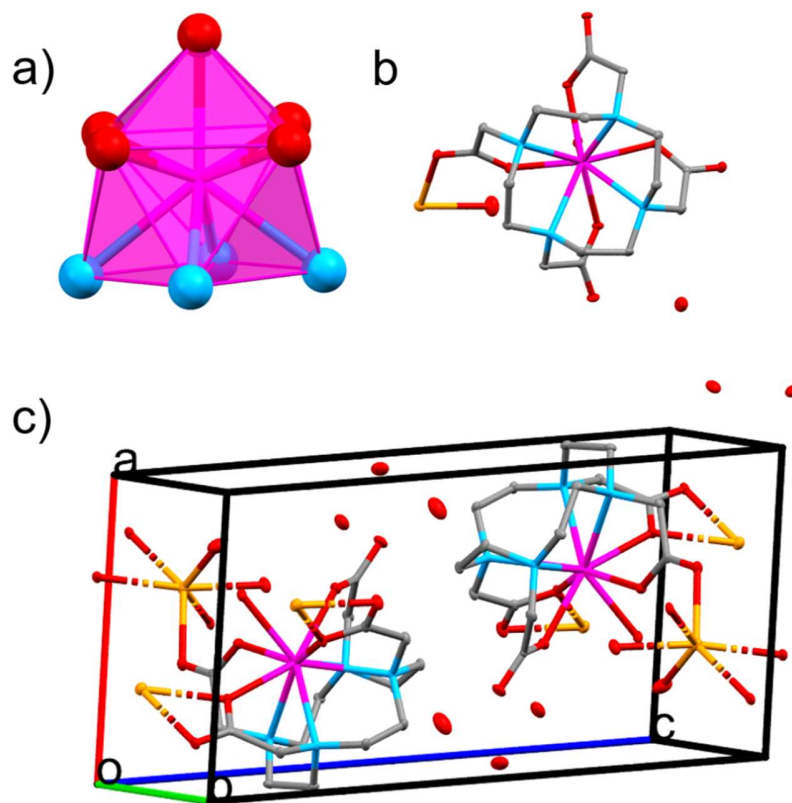

**Figure S 5:** **a)** Polyhedral depicting coordination around the Eu<sup>3+</sup> ion in Na[Eu(DOTA)H<sub>2</sub>O]·4H<sub>2</sub>O. **b)** The asymmetric unit for Na[Eu(DOTA)H<sub>2</sub>O]·4H<sub>2</sub>O. **c)** The unit cell for Na[Eu(DOTA)H<sub>2</sub>O]·4H<sub>2</sub>O. Colour code: Eu = pink, N = light blue, C = blue, O = red and Na = orange. Hydrogen atoms omitted for clarity. Thermal ellipsoids are 50% probability.

### 1.1.3.3 Na[Eu(DOTA)H<sub>2</sub>O]·4H<sub>2</sub>O Crystallographic Information

**Table S 3:** Crystal data and structure refinement for Na[Eu(DOTA)H<sub>2</sub>O]·4H<sub>2</sub>O.

| Crystal data      |                                                                    |
|-------------------|--------------------------------------------------------------------|
| Empirical formula | C <sub>16</sub> H <sub>34</sub> EuN <sub>4</sub> NaO <sub>13</sub> |
| Formula weight    | 665.42                                                             |
| Temperature/K     | 100                                                                |
| Crystal system    | triclinic                                                          |
| Space group       | P-1                                                                |
| a/Å               | 8.6270(5)                                                          |

|                                         |                                     |
|-----------------------------------------|-------------------------------------|
| b/Å                                     | 9.1258(6)                           |
| c/Å                                     | 15.6209(9)                          |
| $\alpha$ /°                             | 82.982(2)                           |
| $\beta$ /°                              | 85.085(2)                           |
| $\gamma$ /°                             | 81.209(3)                           |
| Volume/Å <sup>3</sup>                   | 1203.44(13)                         |
| Z                                       | 2                                   |
| $\rho_{\text{calc}}$ /g/cm <sup>3</sup> | 1.836                               |
| $\mu$ /mm <sup>-1</sup>                 | 2.696                               |
| F(000)                                  | 672.0                               |
| Crystal size/mm <sup>3</sup>            | 0.205 × 0.14 × 0.06                 |
| Radiation                               | MoK $\alpha$ ( $\lambda$ = 0.71073) |

### Refinement

---

|                                        |                                                                |
|----------------------------------------|----------------------------------------------------------------|
| 2 $\Theta$ range for data collection/° | 4.544 to 61.012                                                |
| Index ranges                           | -12 ≤ h ≤ 12, -13 ≤ k ≤ 13, -22 ≤ l ≤ 22                       |
| Reflections collected                  | 57415                                                          |
| Independent reflections                | 7345 [ $R_{\text{int}}$ = 0.0667, $R_{\text{sigma}}$ = 0.0401] |

### Refinement

---

|                                             |                                  |
|---------------------------------------------|----------------------------------|
| Data/restraints/parameters                  | 7345/2/343                       |
| Goodness-of-fit on F <sup>2</sup>           | 1.049                            |
| Final R indexes [ $I > 2\sigma(I)$ ]        | $R_1 = 0.0250$ , $wR_2 = 0.0467$ |
| Final R indexes [all data]                  | $R_1 = 0.0341$ , $wR_2 = 0.0489$ |
| Largest diff. peak/hole / e Å <sup>-3</sup> | 0.92/-0.93                       |

---

## 1.1.4 Na[Eu(EDTA)(H<sub>2</sub>O)<sub>3</sub>]·5H<sub>2</sub>O Experimental and Crystallographic Information

### 1.1.4.1 Na[Eu(EDTA)(H<sub>2</sub>O)<sub>3</sub>]·4H<sub>2</sub>O Picture of Crystals

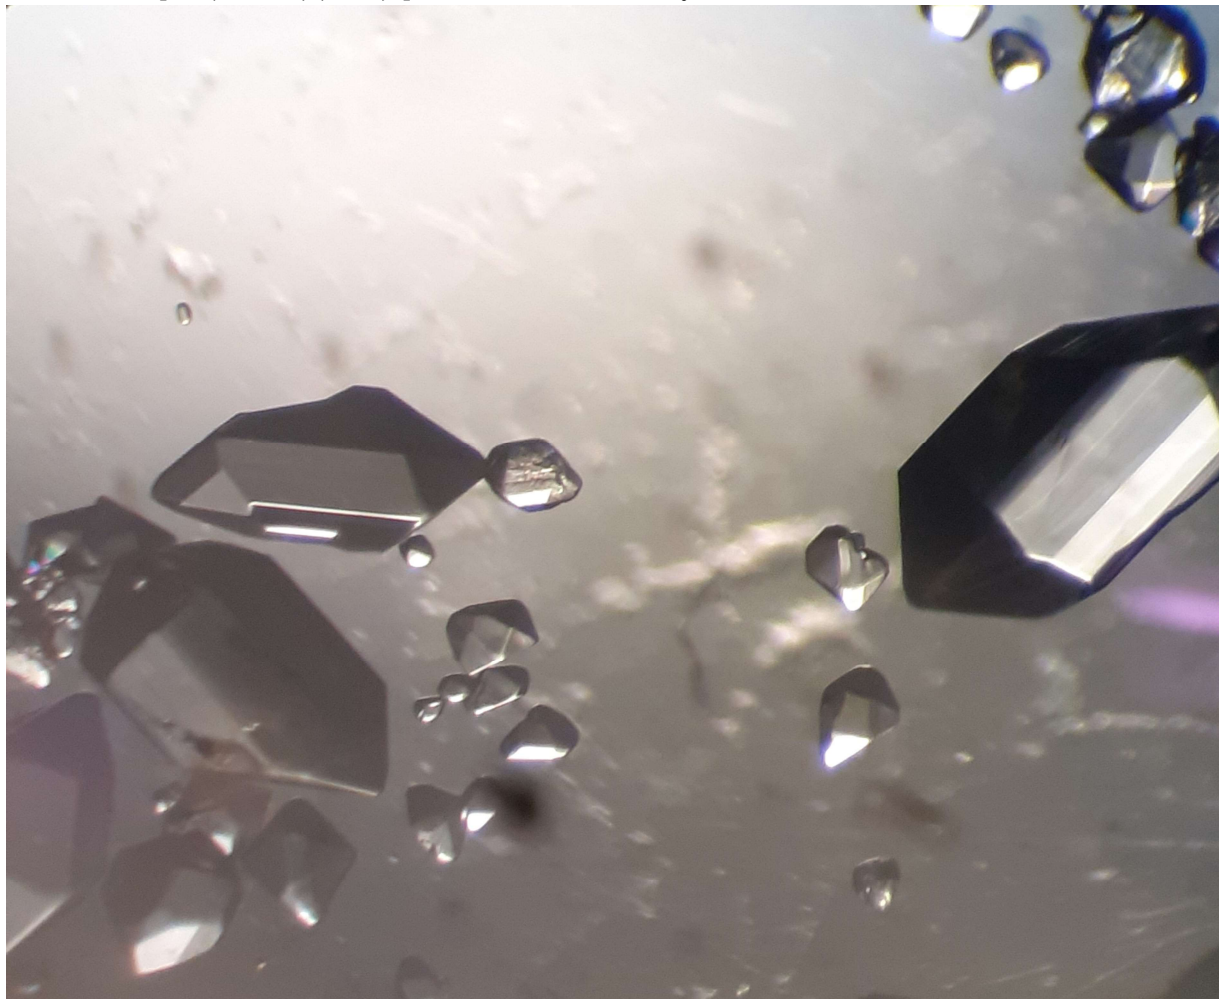

**Figure S 6:** Pictures of Na[Eu(EDTA)(H<sub>2</sub>O)<sub>3</sub>]·5H<sub>2</sub>O made following the description in the experimental section. The crystals have a difference in size, but all of the crystal were found to be clear, light, and colourless with a prism structure. All crystals were observed to have the same phase. The complex crystallises in the orthorhombic *Fdd2* space group.

#### 1.1.4.2 Na[Eu(EDTA)(H<sub>2</sub>O)<sub>3</sub>]·5H<sub>2</sub>O Crystal Structure

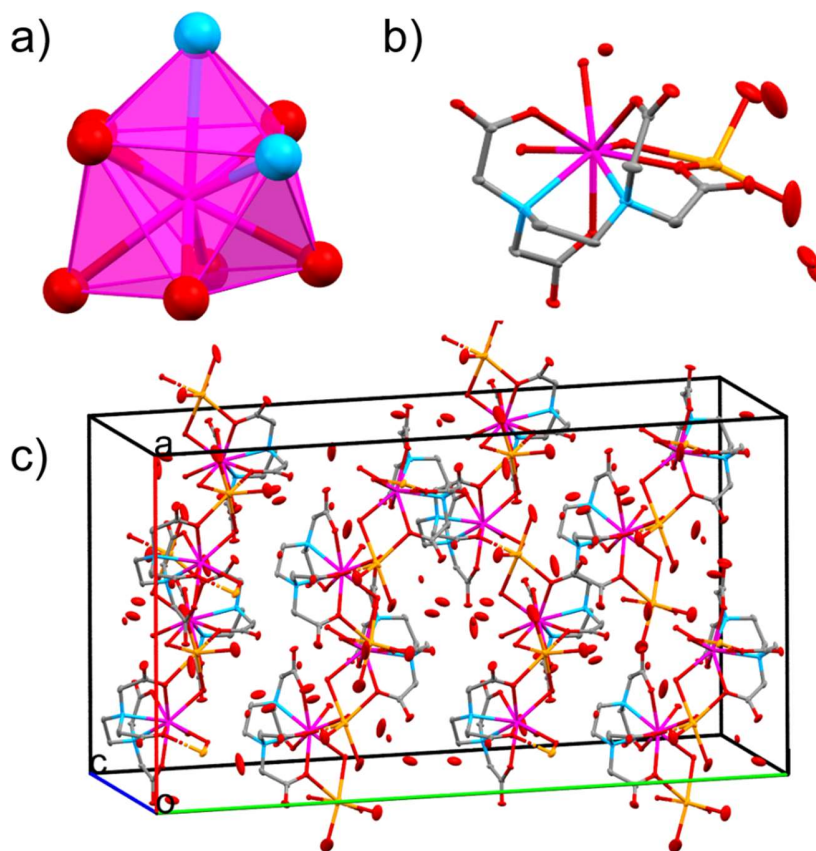

**Figure S 7:** **a)** Polyhedral depicting coordination around the Eu<sup>3+</sup> ion in Na[Eu(EDTA)(H<sub>2</sub>O)<sub>3</sub>]·5H<sub>2</sub>O. **b)** The asymmetric unit for Na[Eu(EDTA)(H<sub>2</sub>O)<sub>3</sub>]·5H<sub>2</sub>O. **c)** The unit cell for Na[Eu(EDTA)(H<sub>2</sub>O)<sub>3</sub>]·5H<sub>2</sub>O. Colour code: Eu = pink, N = light blue, C = blue, O = red and Na = orange. Hydrogen atoms omitted for clarity. Thermal ellipsoids are 50% probability.

### 1.1.4.3 Na[Eu(EDTA)(H<sub>2</sub>O)<sub>3</sub>]·5H<sub>2</sub>O Crystallographic Information

**Table S 4:** Crystal data and structure refinement for Na[Eu(EDTA)(H<sub>2</sub>O)<sub>3</sub>]·5H<sub>2</sub>O.

---

| <b>Crystal data</b>                |                                                                    |
|------------------------------------|--------------------------------------------------------------------|
| Empirical formula                  | C <sub>10</sub> H <sub>28</sub> EuN <sub>2</sub> NaO <sub>16</sub> |
| Formula weight                     | 607.29                                                             |
| Temperature/K                      | 100                                                                |
| Crystal system                     | orthorhombic                                                       |
| Space group                        | Fdd2                                                               |
| a/Å                                | 19.3808(9)                                                         |
| b/Å                                | 35.2814(17)                                                        |
| c/Å                                | 12.0315(6)                                                         |
| α/°                                | 90                                                                 |
| β/°                                | 90                                                                 |
| γ/°                                | 90                                                                 |
| Volume/Å <sup>3</sup>              | 8226.9(7)                                                          |
| Z                                  | 16                                                                 |
| ρ <sub>calc</sub> /cm <sup>3</sup> | 1.938                                                              |
| μ/mm <sup>-1</sup>                 | 3.151                                                              |
| F(000)                             | 4752.0                                                             |
| Crystal size/mm <sup>3</sup>       | 0.606 × 0.522 × 0.434                                              |
| Radiation                          | MoKα (λ = 0.71073)                                                 |

---

| <b>Data collection</b>         |                                                               |
|--------------------------------|---------------------------------------------------------------|
| 2θ range for data collection/° | 4.148 to 61.994                                               |
| Index ranges                   | -27 ≤ h ≤ 28, -50 ≤ k ≤ 51, -17 ≤ l ≤ 17                      |
| Reflections collected          | 35327                                                         |
| Independent reflections        | 6527 [R <sub>int</sub> = 0.0431, R <sub>sigma</sub> = 0.0328] |

---

---

**Refinement**

|                                                |                                  |
|------------------------------------------------|----------------------------------|
| Data/restraints/parameters                     | 6527/21/325                      |
| Goodness-of-fit on $F^2$                       | 1.049                            |
| Final R indexes [ $I \geq 2\sigma(I)$ ]        | $R_1 = 0.0193$ , $wR_2 = 0.0461$ |
| Final R indexes [all data]                     | $R_1 = 0.0199$ , $wR_2 = 0.0464$ |
| Largest diff. peak/hole / $e \text{ \AA}^{-3}$ | 1.13/-1.88                       |
| Flack parameter                                | 0.018(10)                        |

---

## 1.2 Sm<sup>3+</sup> Compounds Crystallographic Information

### 1.2.1 Na<sub>3</sub>[Sm(ODA)<sub>3</sub>]·7H<sub>2</sub>O Experimental and Crystallographic Information

#### 1.2.1.1 Picture of Na<sub>3</sub>[Sm(ODA)<sub>3</sub>]·7H<sub>2</sub>O Crystals

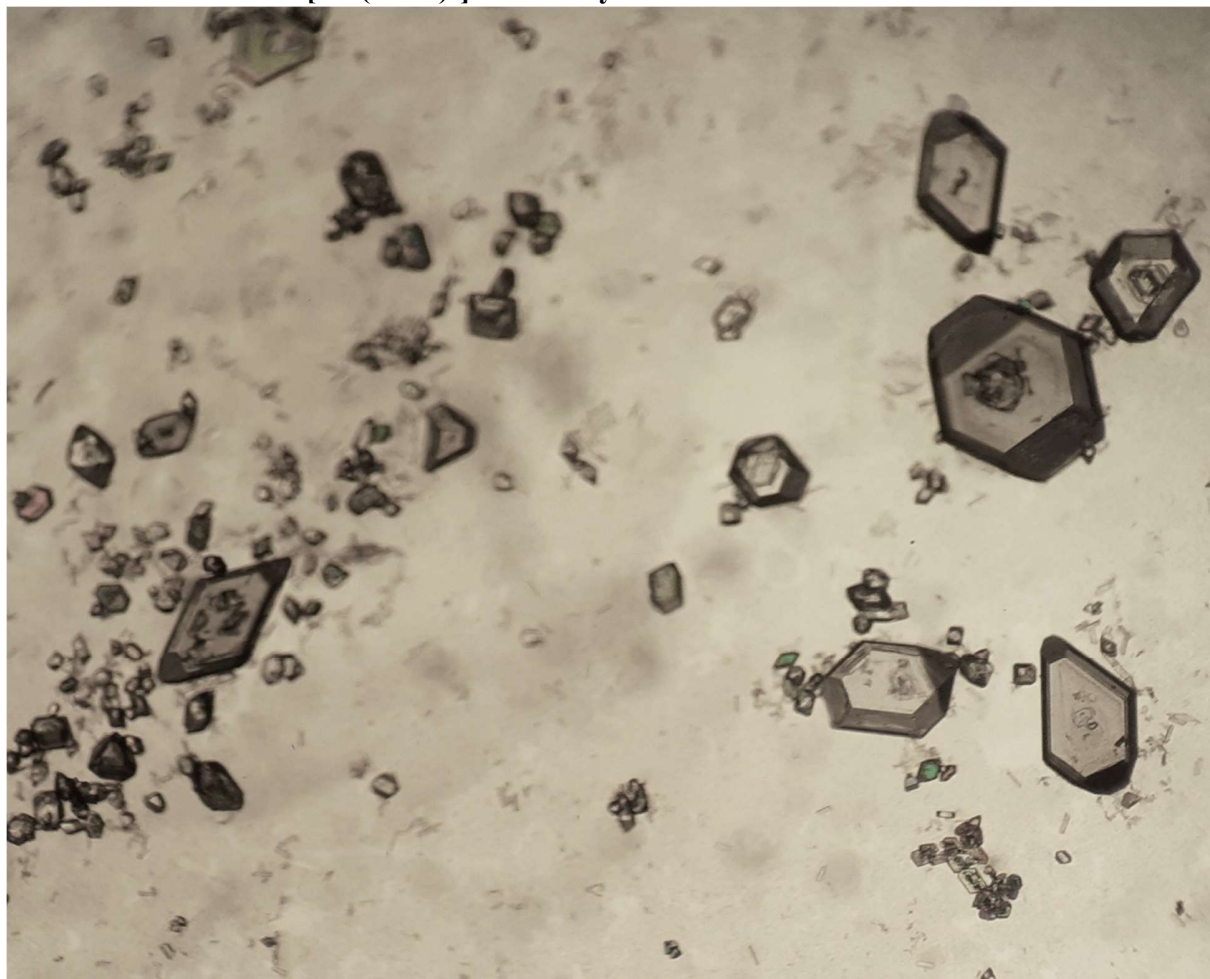

**Figure S 8:** Pictures of Na<sub>3</sub>[Sm(ODA)<sub>3</sub>]·7H<sub>2</sub>O made following the description in the experimental section. The crystals have a difference in size, but all of the crystal were found to be clear, light, and colourless with a prism structure. All crystals were observed to have the same phase. The complex crystallises in the monoclinic *Cc* space group.



### 1.2.1.2 Na<sub>3</sub>[Sm(ODA)<sub>3</sub>]·7H<sub>2</sub>O Crystal Structure

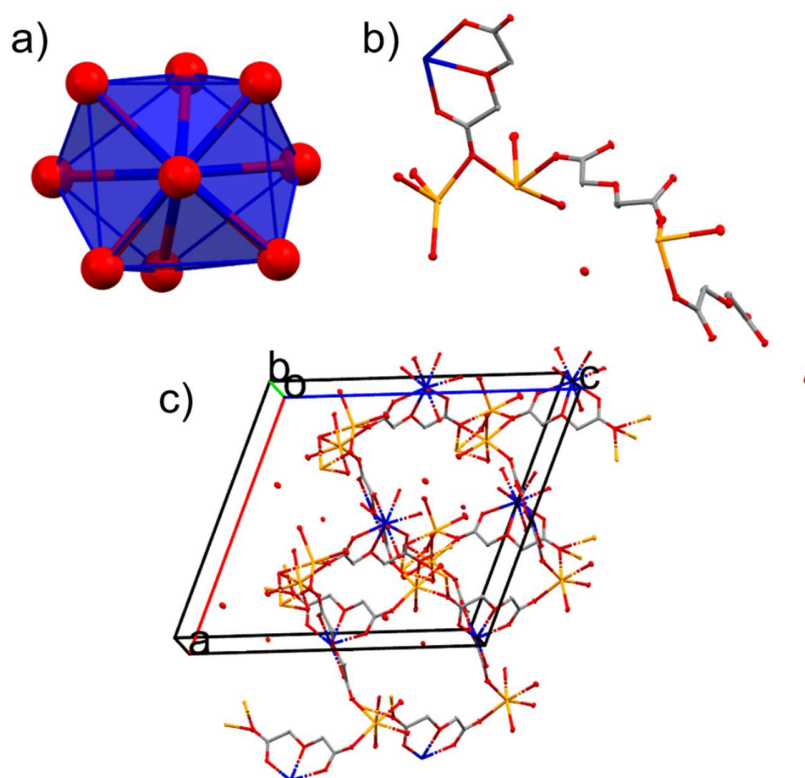

**Figure S 9:** **a)** Polyhedral depicting coordination around the Sm<sup>3+</sup> ion in Na<sub>3</sub>[Sm(ODA)<sub>3</sub>]·7H<sub>2</sub>O. **b)** The asymmetric unit for Na<sub>3</sub>[Sm(ODA)<sub>3</sub>]·7H<sub>2</sub>O. **c)** The unit cell for Na<sub>3</sub>[Sm(ODA)<sub>3</sub>]·7H<sub>2</sub>O. Colour code: Sm = dark blue, N = light blue, C = blue, O = red and Na = orange. Hydrogen atoms omitted for clarity. Thermal ellipsoids are 50% probability.

### 1.2.1.3 Na<sub>3</sub>[Sm(ODA)<sub>3</sub>]·7H<sub>2</sub>O Crystallographic Information

**Table S 5:** Crystal data and structure refinement for Na<sub>3</sub>[Sm(ODA)<sub>3</sub>]·7H<sub>2</sub>O.

---

#### Crystal data

|                   |                                                                    |
|-------------------|--------------------------------------------------------------------|
| Empirical formula | C <sub>12</sub> H <sub>28</sub> Na <sub>3</sub> O <sub>23</sub> Sm |
| Formula weight    | 759.66                                                             |
| Temperature/K     | 100                                                                |
| Crystal system    | monoclinic                                                         |
| Space group       | Cc                                                                 |
| a/Å               | 17.5900(13)                                                        |
| b/Å               | 8.3808(6)                                                          |

|                                  |                                      |
|----------------------------------|--------------------------------------|
| $c/\text{\AA}$                   | 19.0418(16)                          |
| $\alpha/^\circ$                  | 90                                   |
| $\beta/^\circ$                   | 111.266(3)                           |
| $\gamma/^\circ$                  | 90                                   |
| Volume/ $\text{\AA}^3$           | 2616.0(4)                            |
| $Z$                              | 8                                    |
| $\rho_{\text{calc}}/\text{cm}^3$ | 1.929                                |
| $\mu/\text{mm}^{-1}$             | 2.393                                |
| $F(000)$                         | 1516.0                               |
| Crystal size/ $\text{mm}^3$      | $0.416 \times 0.324 \times 0.202$    |
| Radiation                        | MoK $\alpha$ ( $\lambda = 0.71073$ ) |

---

#### Data collection

|                                               |                                                                |
|-----------------------------------------------|----------------------------------------------------------------|
| $2\Theta$ range for data collection/ $^\circ$ | 4.59 to 68.674                                                 |
| Index ranges                                  | $-26 \leq h \leq 27, -13 \leq k \leq 13, -30 \leq l \leq 30$   |
| Reflections collected                         | 46134                                                          |
| Independent reflections                       | 10560 [ $R_{\text{int}} = 0.0428, R_{\text{sigma}} = 0.0434$ ] |

---

#### Refinement

|                                               |                               |
|-----------------------------------------------|-------------------------------|
| Data/restraints/parameters                    | 10560/3/371                   |
| Goodness-of-fit on $F^2$                      | 1.063                         |
| Final R indexes [ $ I  \geq 2\sigma(I)$ ]     | $R_1 = 0.0228, wR_2 = 0.0448$ |
| Final R indexes [all data]                    | $R_1 = 0.0273, wR_2 = 0.0461$ |
| Largest diff. peak/hole / $e \text{\AA}^{-3}$ | 0.44/-0.61                    |
| Flack parameter                               | 0.032(7)                      |

---

## 1.2.2 $\text{Cs}_3[\text{Sm}(\text{DPA})_3] \cdot 9\text{H}_2\text{O}$ Experimental and Crystallographic Information

### 1.2.2.1 Picture of $\text{Cs}_3[\text{Sm}(\text{DPA})_3] \cdot 9\text{H}_2\text{O}$ Crystals

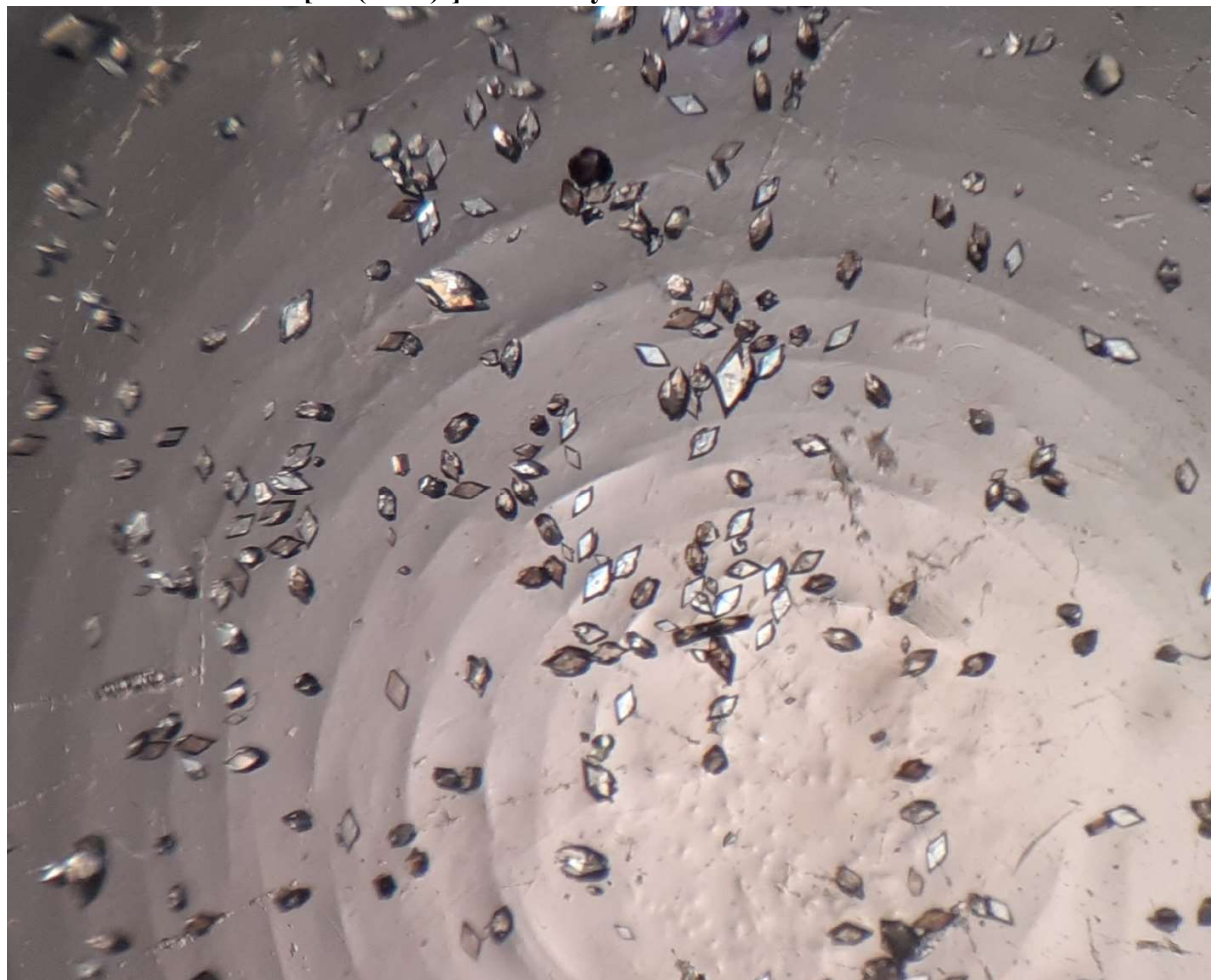

**Figure S 10:** Pictures of  $\text{Cs}_3[\text{Sm}(\text{DPA})_3] \cdot 9\text{H}_2\text{O}$  made following the description in the experimental section. The crystals have a difference in size, but all of the crystal were found to be clear, light, and colourless with a prism structure. All crystals were observed to have the same phase. The complex crystallises in the orthorhombic  $C222_1$  space group.

### 1.2.2.2 Cs<sub>3</sub>[Sm(DPA)<sub>3</sub>]·9H<sub>2</sub>O Crystal Structure

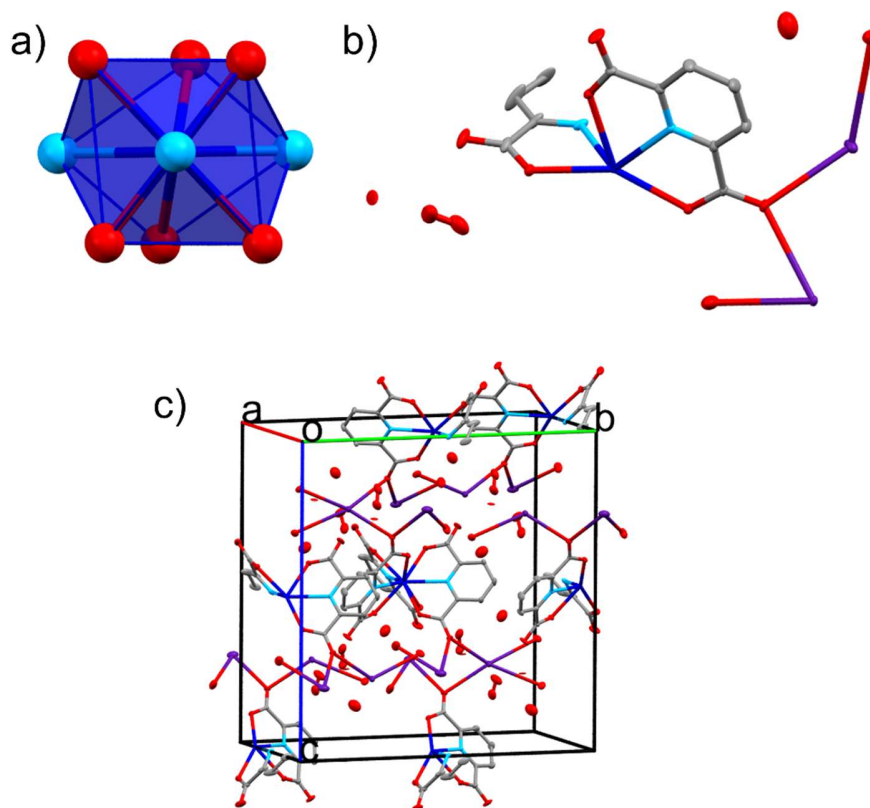

**Figure S 11:** **a)** Polyhedral depicting coordination around the Sm<sup>3+</sup> ion in Cs<sub>3</sub>[Sm(DPA)<sub>3</sub>]·9H<sub>2</sub>O. **b)** The asymmetric unit for Cs<sub>3</sub>[Sm(DPA)<sub>3</sub>]·9H<sub>2</sub>O. **c)** The unit cell for Cs<sub>3</sub>[Sm(DPA)<sub>3</sub>]·9H<sub>2</sub>O. Colour code: Sm = dark blue, N = light blue, C = blue, O = red and Na = orange. Hydrogen atoms omitted for clarity. Thermal ellipsoids are 50% probability.

### 1.2.2.3 Cs<sub>3</sub>[Sm(DPA)<sub>3</sub>]·9H<sub>2</sub>O Crystallographic Information

**Table S 6:** Crystal data and structure refinement for Cs<sub>3</sub>[Sm(DPA)<sub>3</sub>]·9H<sub>2</sub>O.

#### Crystal data

|                   |                                                                                   |
|-------------------|-----------------------------------------------------------------------------------|
| Empirical formula | C <sub>21</sub> H <sub>23</sub> Cs <sub>3</sub> N <sub>3</sub> O <sub>21</sub> Sm |
| Formula weight    | 1202.50                                                                           |
| Temperature/K     | 100                                                                               |
| Crystal system    | orthorhombic                                                                      |
| Space group       | C222 <sub>1</sub>                                                                 |
| a/Å               | 10.0017(13)                                                                       |

|                                       |                                     |
|---------------------------------------|-------------------------------------|
| b/Å                                   | 18.033(3)                           |
| c/Å                                   | 18.530(3)                           |
| $\alpha$ /°                           | 90                                  |
| $\beta$ /°                            | 90                                  |
| $\gamma$ /°                           | 90                                  |
| Volume/Å <sup>3</sup>                 | 3342.1(8)                           |
| Z                                     | 4                                   |
| $\rho_{\text{calc}}$ /cm <sup>3</sup> | 2.398                               |
| $\mu$ /mm <sup>-1</sup>               | 5.068                               |
| F(000)                                | 2268.0                              |
| Crystal size/mm <sup>3</sup>          | 0.162 × 0.127 × 0.071               |
| Radiation                             | MoK $\alpha$ ( $\lambda$ = 0.71073) |

---

### Data collection

|                                        |                                                                |
|----------------------------------------|----------------------------------------------------------------|
| 2 $\Theta$ range for data collection/° | 4.396 to 72.66                                                 |
| Index ranges                           | -16 ≤ h ≤ 16, -30 ≤ k ≤ 30, -30 ≤ l ≤ 30                       |
| Reflections collected                  | 64847                                                          |
| Independent reflections                | 8116 [ $R_{\text{int}}$ = 0.0502, $R_{\text{sigma}}$ = 0.0283] |

---

### Refinement

|                                             |                                 |
|---------------------------------------------|---------------------------------|
| Data/restraints/parameters                  | 8116/15/257                     |
| Goodness-of-fit on F <sup>2</sup>           | 1.068                           |
| Final R indexes [ $I \geq 2\sigma(I)$ ]     | $R_1$ = 0.0244, $wR_2$ = 0.0617 |
| Final R indexes [all data]                  | $R_1$ = 0.0284, $wR_2$ = 0.0637 |
| Largest diff. peak/hole / e Å <sup>-3</sup> | 2.35/-2.02                      |
| Flack parameter                             | 0.132(16)                       |

---

### 1.2.3 Na[Sm(DOTA)H<sub>2</sub>O]·4H<sub>2</sub>O Experimental and Crystallographic Information

#### 1.2.3.1 Picture of Na[Sm(DOTA)H<sub>2</sub>O]·4H<sub>2</sub>O Crystals

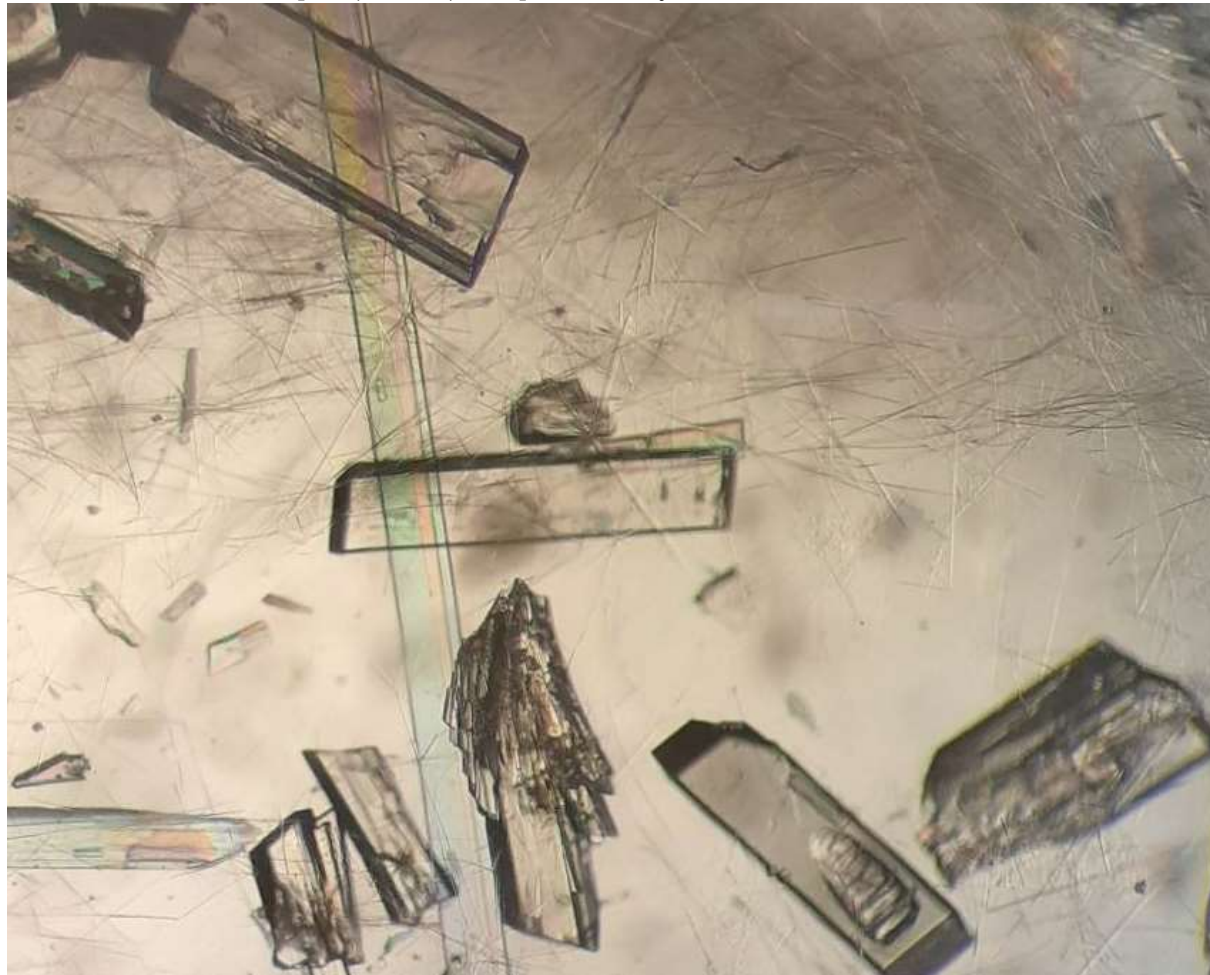

**Figure S 12:** Pictures of Na[Sm(DOTA)H<sub>2</sub>O]·4H<sub>2</sub>O made following the description in the experimental section. The crystals have a difference in size, but all the crystal were found to be clear, light, and colourless with an irregular structure. All crystals were observed to have the same phase. The complex crystallises in the triclinic  $P\bar{1}$  space group.

### 1.2.3.2 Na[Sm(DOTA)H<sub>2</sub>O]·4H<sub>2</sub>O Crystal Structure

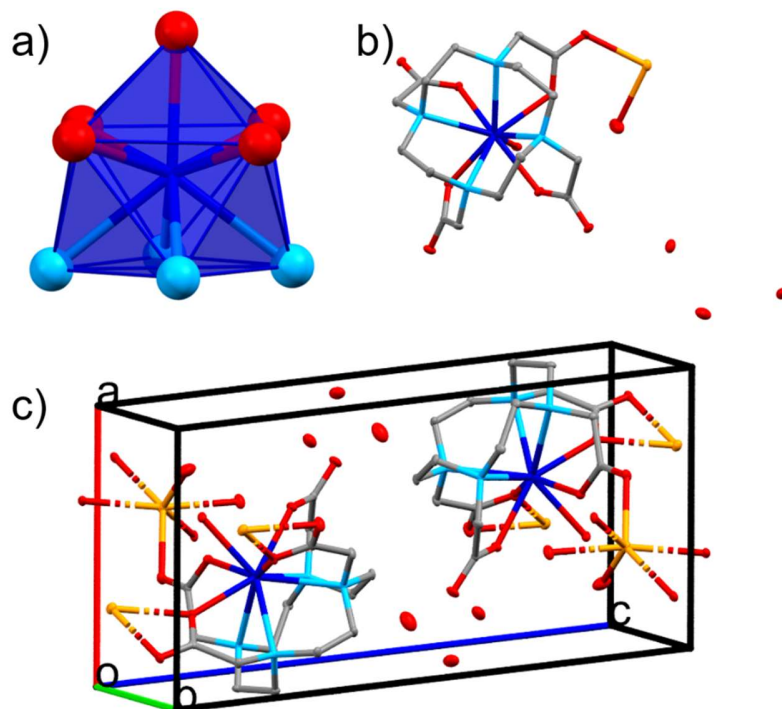

**Figure S 13:** **a)** Polyhedral depicting coordination around the Sm<sup>3+</sup> ion in Na[Sm(DOTA)H<sub>2</sub>O]·4H<sub>2</sub>O. **b)** The asymmetric unit for Na[Sm(DOTA)H<sub>2</sub>O]·4H<sub>2</sub>O. **c)** The unit cell for Na[Sm(DOTA)H<sub>2</sub>O]·4H<sub>2</sub>O. Colour code: Sm = dark blue, N = light blue, C = blue, O = red and Na = orange. Hydrogen atoms omitted for clarity. Thermal ellipsoids are 50% probability.

### 1.2.3.3 Na[Sm(DOTA)H<sub>2</sub>O]·4H<sub>2</sub>O Crystallographic Information

**Table S 7:** Crystal data and structure refinement for Na[Sm(DOTA)(H<sub>2</sub>O)]·5H<sub>2</sub>O.

#### Crystal data

|                   |                                                                     |
|-------------------|---------------------------------------------------------------------|
| Empirical formula | C <sub>16</sub> H <sub>34</sub> N <sub>4</sub> NaO <sub>13</sub> Sm |
| Formula weight    | 663.81                                                              |
| Temperature/K     | 100                                                                 |
| Crystal system    | triclinic                                                           |
| Space group       | P-1                                                                 |
| a/Å               | 8.6233(8)                                                           |
| b/Å               | 9.1615(8)                                                           |
| c/Å               | 15.6526(14)                                                         |

|                                  |                                      |
|----------------------------------|--------------------------------------|
| $\alpha/^\circ$                  | 82.938(3)                            |
| $\beta/^\circ$                   | 84.975(3)                            |
| $\gamma/^\circ$                  | 80.994(3)                            |
| Volume/ $\text{\AA}^3$           | 1209.13(19)                          |
| Z                                | 2                                    |
| $\rho_{\text{calc}}/\text{cm}^3$ | 1.823                                |
| $\mu/\text{mm}^{-1}$             | 2.518                                |
| F(000)                           | 670.0                                |
| Crystal size/ $\text{mm}^3$      | $0.291 \times 0.134 \times 0.083$    |
| Radiation                        | MoK $\alpha$ ( $\lambda = 0.71073$ ) |

---

#### Data collection

|                                                |                                                               |
|------------------------------------------------|---------------------------------------------------------------|
| 2 $\Theta$ range for data collection/ $^\circ$ | 4.53 to 64.06                                                 |
| Index ranges                                   | $-12 \leq h \leq 12, -13 \leq k \leq 13, -23 \leq l \leq 23$  |
| Reflections collected                          | 59699                                                         |
| Independent reflections                        | 8427 [ $R_{\text{int}} = 0.0513, R_{\text{sigma}} = 0.0305$ ] |

---

#### Refinement

|                                               |                               |
|-----------------------------------------------|-------------------------------|
| Data/restraints/parameters                    | 8427/0/332                    |
| Goodness-of-fit on $F^2$                      | 1.065                         |
| Final R indexes [ $I \geq 2\sigma(I)$ ]       | $R_1 = 0.0200, wR_2 = 0.0435$ |
| Final R indexes [all data]                    | $R_1 = 0.0249, wR_2 = 0.0450$ |
| Largest diff. peak/hole / $e \text{\AA}^{-3}$ | 0.79/-0.56                    |

---



## 1.2.4 Na[Sm(EDTA)(H<sub>2</sub>O)<sub>3</sub>]·5H<sub>2</sub>O Experimental and Crystallographic Information

### 1.2.4.1 Picture of Na[Sm(EDTA)(H<sub>2</sub>O)<sub>3</sub>]·5H<sub>2</sub>O Crystals

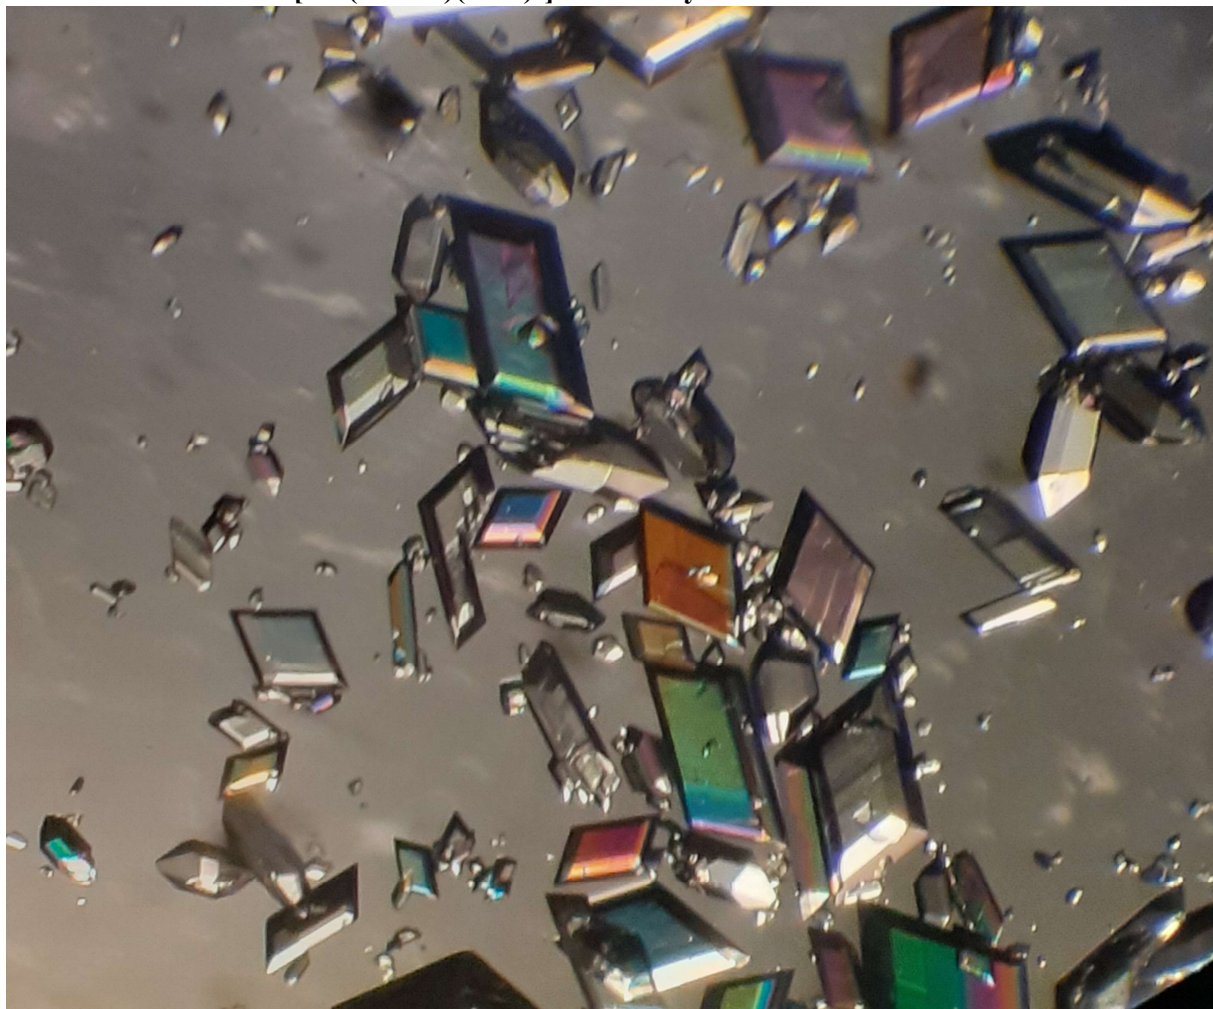

**Figure S 14:** Pictures of Na[Sm(EDTA)(H<sub>2</sub>O)<sub>3</sub>]·5H<sub>2</sub>O made following the description in the experimental section. All of the crystal were found to be clear, light, and colourless with a rhombohedral structure. All crystals were observed to have the same phase. The complex crystallises in the orthorhombic *Fdd2* space group.

### 1.2.4.2 Na[Sm(EDTA)(H<sub>2</sub>O)<sub>3</sub>]·5H<sub>2</sub>O Crystal Structure

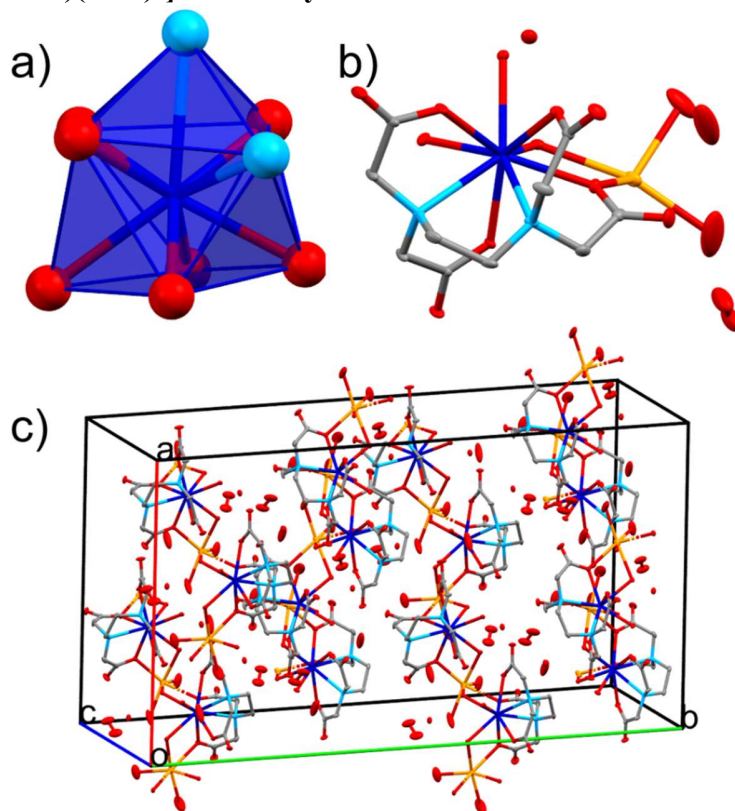

**Figure S 15:** a) Polyhedral depicting coordination around the Sm<sup>3+</sup> ion in Na[Sm(EDTA)(H<sub>2</sub>O)<sub>3</sub>]·5H<sub>2</sub>O. b) The asymmetric unit for Na[Sm(EDTA)(H<sub>2</sub>O)<sub>3</sub>]·5H<sub>2</sub>O. c) The unit cell for Na[Sm(EDTA)(H<sub>2</sub>O)<sub>3</sub>]·5H<sub>2</sub>O. Colour code: Sm = dark blue, N = light blue, C = blue, O = red and Na = orange. Hydrogen atoms omitted for clarity. Thermal ellipsoids are 50% probability.

### 1.2.4.3 Na[Sm(EDTA)(H<sub>2</sub>O)<sub>3</sub>]·5H<sub>2</sub>O Crystallographic Information

**Table S 8:** Crystal data and structure refinement for Na[Sm(EDTA)(H<sub>2</sub>O)<sub>3</sub>]·5H<sub>2</sub>O.

#### Crystal data

|                   |                                                                     |
|-------------------|---------------------------------------------------------------------|
| Empirical formula | C <sub>10</sub> H <sub>28</sub> N <sub>2</sub> NaO <sub>16</sub> Sm |
| Formula weight    | 605.68                                                              |
| Temperature/K     | 100                                                                 |
| Crystal system    | orthorhombic                                                        |
| Space group       | Fdd2                                                                |
| a/Å               | 19.459(3)                                                           |

|                                       |                                     |
|---------------------------------------|-------------------------------------|
| b/Å                                   | 35.397(6)                           |
| c/Å                                   | 12.032(2)                           |
| $\alpha$ /°                           | 90                                  |
| $\beta$ /°                            | 90                                  |
| $\gamma$ /°                           | 90                                  |
| Volume/Å <sup>3</sup>                 | 8288(2)                             |
| Z                                     | 16                                  |
| $\rho_{\text{calc}}$ /cm <sup>3</sup> | 1.935                               |
| $\mu$ /mm <sup>-1</sup>               | 2.936                               |
| F(000)                                | 4829.0                              |
| Crystal size/mm <sup>3</sup>          | 0.576 × 0.308 × 0.122               |
| Radiation                             | MoK $\alpha$ ( $\lambda$ = 0.71073) |

---

#### Data collection

|                                        |                                                                |
|----------------------------------------|----------------------------------------------------------------|
| 2 $\Theta$ range for data collection/° | 4.142 to 69.942                                                |
| Index ranges                           | -31 ≤ h ≤ 31, -56 ≤ k ≤ 56, -19 ≤ l ≤ 19                       |
| Reflections collected                  | 42482                                                          |
| Independent reflections                | 8972 [ $R_{\text{int}}$ = 0.0458, $R_{\text{sigma}}$ = 0.0418] |

---

#### Refinement

|                                             |                                 |
|---------------------------------------------|---------------------------------|
| Data/restraints/parameters                  | 8972/5/333                      |
| Goodness-of-fit on F <sup>2</sup>           | 1.013                           |
| Final R indexes [ $I \geq 2\sigma(I)$ ]     | $R_1$ = 0.0236, $wR_2$ = 0.0505 |
| Final R indexes [all data]                  | $R_1$ = 0.0268, $wR_2$ = 0.0516 |
| Largest diff. peak/hole / e Å <sup>-3</sup> | 1.57/-1.03                      |
| Flack parameter                             | 0.024(10)                       |

---

## 2 Symmetry Deviation Values

### 2.1 Symmetry Deviation Values for Ideal Nine-coordinated Structures

**Table S 9:** Symmetry deviation values,  $\sigma_{ideal}$ , for comparison of ideal nine-coordinated structures. Values were calculated using AlignIt.<sup>2</sup>

|             |  |  |  |  |  |  |
|-------------|-----------------------------------------------------------------------------------|-----------------------------------------------------------------------------------|-----------------------------------------------------------------------------------|------------------------------------------------------------------------------------|-------------------------------------------------------------------------------------|-------------------------------------------------------------------------------------|
|             | <b>cSAP</b>                                                                       | <b>TTP</b>                                                                        | <b>MFF</b>                                                                        | <b>HOOP</b>                                                                        | <b>TCup</b>                                                                         | <b>HBPy</b>                                                                         |
| <b>cSAP</b> | 0                                                                                 | 0.97                                                                              | 13.51                                                                             | 20.15                                                                              | 16.71                                                                               | 26.83                                                                               |
| <b>TTP</b>  |                                                                                   | 0                                                                                 | 9.63                                                                              | 14.12                                                                              | 19.26                                                                               | 23.25                                                                               |
| <b>MUFF</b> |                                                                                   |                                                                                   | 0                                                                                 | 14.61                                                                              | 20.40                                                                               | 24.92                                                                               |
| <b>HOOP</b> |                                                                                   |                                                                                   |                                                                                   | 0                                                                                  | 19.79                                                                               | 14.49                                                                               |
| <b>TCup</b> |                                                                                   |                                                                                   |                                                                                   |                                                                                    | 0                                                                                   | 21.52                                                                               |
| <b>HBPy</b> |                                                                                   |                                                                                   |                                                                                   |                                                                                    |                                                                                     | 0                                                                                   |

## 2.2 Symmetry Deviation Values for the $\text{Eu}^{3+}$ and $\text{Sm}^{3+}$ Compounds

### 2.2.1 Symmetry Deviation Values for the $\text{Eu}^{3+}$ Compounds

Table S 10: Symmetry deviation values,  $\sigma_{ideal}$ , for the  $\text{Eu}^{3+}$  complexes.

|                                                                                     |                                                                                     |  |  |  |  |  |  |
|-------------------------------------------------------------------------------------|-------------------------------------------------------------------------------------|-----------------------------------------------------------------------------------|-----------------------------------------------------------------------------------|------------------------------------------------------------------------------------|-------------------------------------------------------------------------------------|-------------------------------------------------------------------------------------|-------------------------------------------------------------------------------------|
|                                                                                     |                                                                                     | cSAP                                                                              | TTP                                                                               | MFF                                                                                | HOOP                                                                                | TCup                                                                                | HBPy                                                                                |
|    | $\text{Na}_3[\text{Eu}(\text{ODA})_3] \cdot 8\text{H}_2\text{O}$                    | 1.26                                                                              | <b>0.76</b>                                                                       | 11.55                                                                              | 19.94                                                                               | 18.33                                                                               | 24.65                                                                               |
|    | $\text{Cs}_3[\text{Eu}(\text{DPA})_3] \cdot 9\text{H}_2\text{O}$                    | 1.87                                                                              | <b>0.89</b>                                                                       | 9.88                                                                               | 14.84                                                                               | 18.96                                                                               | 23.85                                                                               |
|   | $\text{Na}[\text{Eu}(\text{DOTA})(\text{H}_2\text{O})_3] \cdot 4\text{H}_2\text{O}$ | <b>0.38</b>                                                                       | 1.48                                                                              | 14.32                                                                              | 20.21                                                                               | 18.41                                                                               | 26.25                                                                               |
|  | $\text{Na}[\text{Eu}(\text{EDTA})(\text{H}_2\text{O})_3] \cdot 5\text{H}_2\text{O}$ | <b>0.63</b>                                                                       | 0.96                                                                              | 14.35                                                                              | 18.78                                                                               | 17.03                                                                               | 25.31                                                                               |

**Table S 11:** Symmetry deviation values,  $\sigma_{ideal}$ , for the  $\text{Eu}^{3+}$  complexes.

|                                                                                                                                                                        | 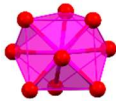 |  |  |  |
|------------------------------------------------------------------------------------------------------------------------------------------------------------------------|-----------------------------------------------------------------------------------|-----------------------------------------------------------------------------------|------------------------------------------------------------------------------------|-------------------------------------------------------------------------------------|
|                                                                                                                                                                        | $\text{Na}_3[\text{Eu}(\text{ODA})_3] \cdot 8\text{H}_2\text{O}$                  | $\text{Cs}_3[\text{Eu}(\text{DPA})_3] \cdot 9\text{H}_2\text{O}$                  | $\text{Na}[\text{Eu}(\text{DOTA})(\text{H}_2\text{O})] \cdot 4\text{H}_2\text{O}$  | $\text{Na}[\text{Eu}(\text{EDTA})(\text{H}_2\text{O})_3] \cdot 5\text{H}_2\text{O}$ |
|  $\text{Na}_3[\text{Eu}(\text{ODA})_3] \cdot 8\text{H}_2\text{O}$                     | -                                                                                 | -                                                                                 | -                                                                                  | -                                                                                   |
|  $\text{Cs}_3[\text{Eu}(\text{DPA})_3] \cdot 9\text{H}_2\text{O}$                     | 0.19                                                                              | -                                                                                 | -                                                                                  | -                                                                                   |
|  $\text{Na}[\text{Eu}(\text{DOTA})(\text{H}_2\text{O})] \cdot 4\text{H}_2\text{O}$    | 1.15                                                                              | 1.97                                                                              | -                                                                                  | -                                                                                   |
|  $\text{Na}[\text{Eu}(\text{EDTA})(\text{H}_2\text{O})_3] \cdot 5\text{H}_2\text{O}$ | 1.73                                                                              | 1.29                                                                              | 1.07                                                                               | -                                                                                   |

## 2.2.2 Symmetry Deviation Values for the Sm<sup>3+</sup> Compounds

Table S 12: Symmetry deviation values,  $\sigma_{ideal}$ , for the Sm<sup>3+</sup> complexes.

|                                                                                    |                                                                 |  |  |  |  |  |  |
|------------------------------------------------------------------------------------|-----------------------------------------------------------------|-----------------------------------------------------------------------------------|-----------------------------------------------------------------------------------|------------------------------------------------------------------------------------|-------------------------------------------------------------------------------------|-------------------------------------------------------------------------------------|-------------------------------------------------------------------------------------|
|                                                                                    |                                                                 | <b>cSAP</b>                                                                       | <b>TTP</b>                                                                        | <b>MFF</b>                                                                         | <b>HOOP</b>                                                                         | <b>TCup</b>                                                                         | <b>HBPy</b>                                                                         |
|   | <b>Na<sub>3</sub>[Sm(ODA)<sub>3</sub>]·7H<sub>2</sub>O</b>      | 1.40                                                                              | <b>0.87</b>                                                                       | 11.49                                                                              | 16.54                                                                               | 18.81                                                                               | 23.94                                                                               |
|   | <b>Cs<sub>3</sub>[Sm(DPA)<sub>3</sub>]·9H<sub>2</sub>O</b>      | 1.92                                                                              | <b>0.96</b>                                                                       | 11.19                                                                              | 20.24                                                                               | 19.35                                                                               | 24.12                                                                               |
|   | <b>Na[Sm(DOTA)(H<sub>2</sub>O)]·4H<sub>2</sub>O</b>             | <b>0.39</b>                                                                       | 1.49                                                                              | 13.63                                                                              | 21.10                                                                               | 17.77                                                                               | 26.14                                                                               |
|  | <b>Na[Sm(EDTA)(H<sub>2</sub>O)<sub>3</sub>]·5H<sub>2</sub>O</b> | <b>0.64</b>                                                                       | 0.99                                                                              | 13.97                                                                              | 18.55                                                                               | 18.24                                                                               | 25.34                                                                               |

**Table S 13:** Symmetry deviation values,  $\sigma_{ideal}$ , for the  $\text{Sm}^{3+}$  complexes.

|                                                                                                                                                                        | 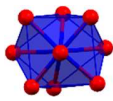 |  |  |  |
|------------------------------------------------------------------------------------------------------------------------------------------------------------------------|-----------------------------------------------------------------------------------|-----------------------------------------------------------------------------------|------------------------------------------------------------------------------------|-------------------------------------------------------------------------------------|
|                                                                                                                                                                        | $\text{Na}_3[\text{Sm}(\text{ODA})_3] \cdot 7\text{H}_2\text{O}$                  | $\text{Cs}_3[\text{Sm}(\text{DPA})_3] \cdot 9\text{H}_2\text{O}$                  | $\text{Na}[\text{Sm}(\text{DOTA})(\text{H}_2\text{O})] \cdot 4\text{H}_2\text{O}$  | $\text{Na}[\text{Sm}(\text{EDTA})(\text{H}_2\text{O})_3] \cdot 5\text{H}_2\text{O}$ |
|  $\text{Na}_3[\text{Sm}(\text{ODA})_3] \cdot 7\text{H}_2\text{O}$                     | -                                                                                 |                                                                                   |                                                                                    |                                                                                     |
|  $\text{Cs}_3[\text{Sm}(\text{DPA})_3] \cdot 9\text{H}_2\text{O}$                     | 0.25                                                                              | -                                                                                 |                                                                                    |                                                                                     |
|  $\text{Na}[\text{Sm}(\text{DOTA})(\text{H}_2\text{O})] \cdot 4\text{H}_2\text{O}$    | 0.85                                                                              | 1.62                                                                              | -                                                                                  |                                                                                     |
|  $\text{Na}[\text{Sm}(\text{EDTA})(\text{H}_2\text{O})_3] \cdot 5\text{H}_2\text{O}$ | 0.85                                                                              | 1.33                                                                              | 0.73                                                                               | -                                                                                   |



### 3 PXRD

#### 3.1 PXRD $\text{Eu}^{3+}$ Compounds

##### 3.1.1 $\text{Na}_3[\text{Eu}(\text{ODA})_3] \cdot 8\text{H}_2\text{O}$ PXRD

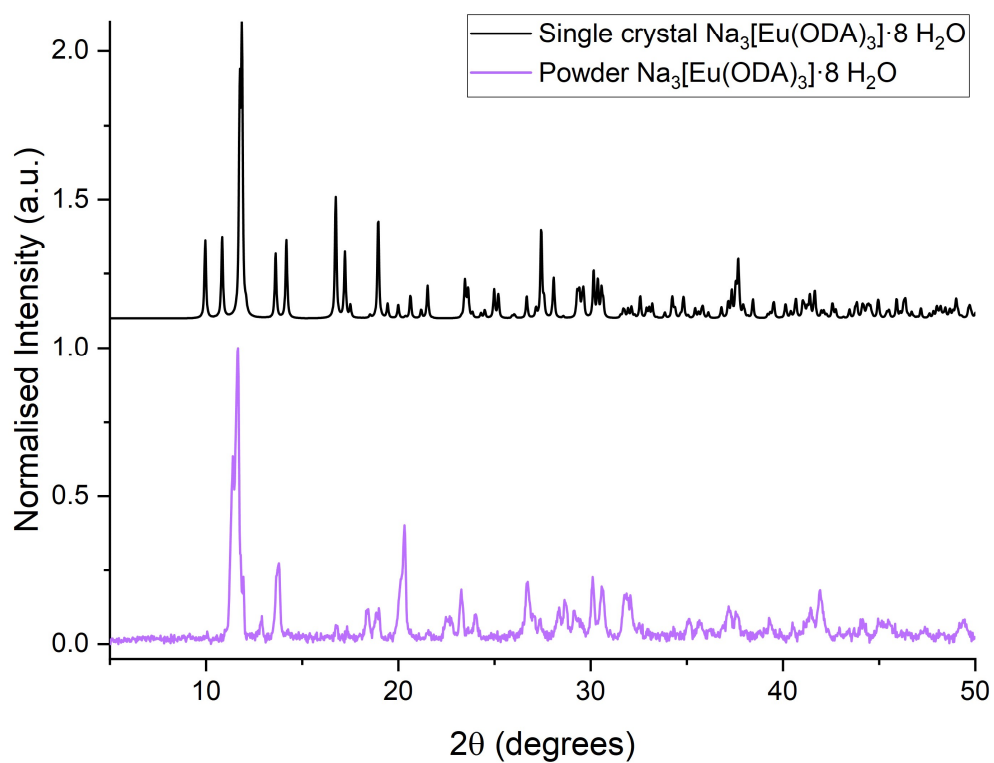

**Figure S 16:** PXRD for  $\text{Na}_3[\text{Eu}(\text{ODA})_3] \cdot 8\text{H}_2\text{O}$ . The black diffractogram is recorded for the powder made from crystals crushed to a powder. The purple diffractogram is simulated from the structure determined for the single crystal.

### 3.1.2 Cs<sub>3</sub>[Eu(DPA)<sub>3</sub>]·9H<sub>2</sub>O PXRD

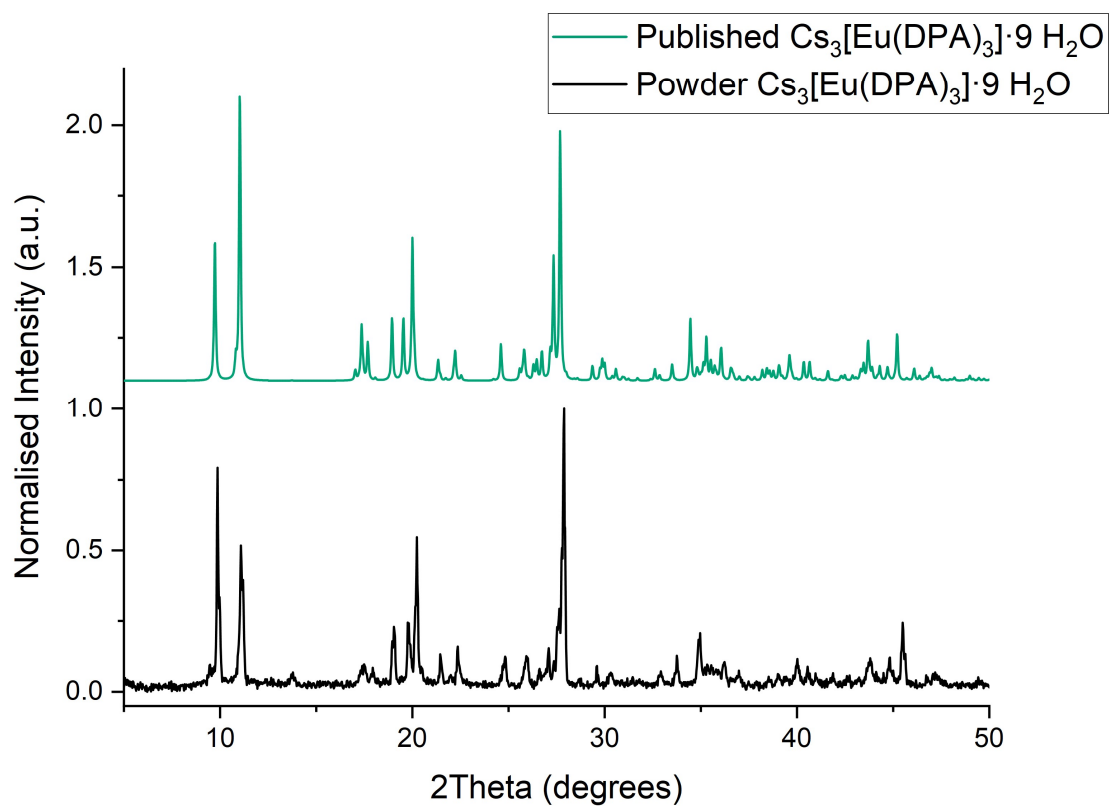

**Figure S 17:** PXRD for Na<sub>3</sub>[Eu(DPA)<sub>3</sub>]·9H<sub>2</sub>O. The black diffractogram is recorded for the powder made from crystals crushed to a powder. The green diffractogram is simulated from the published structure by Brayshaw *et al.*<sup>1</sup> as the crystal created in the experimental section was found to be a twin, and the structure could not be determined.

### 3.1.3 Na[Eu(DOTA)H<sub>2</sub>O]·4H<sub>2</sub>O PXRD

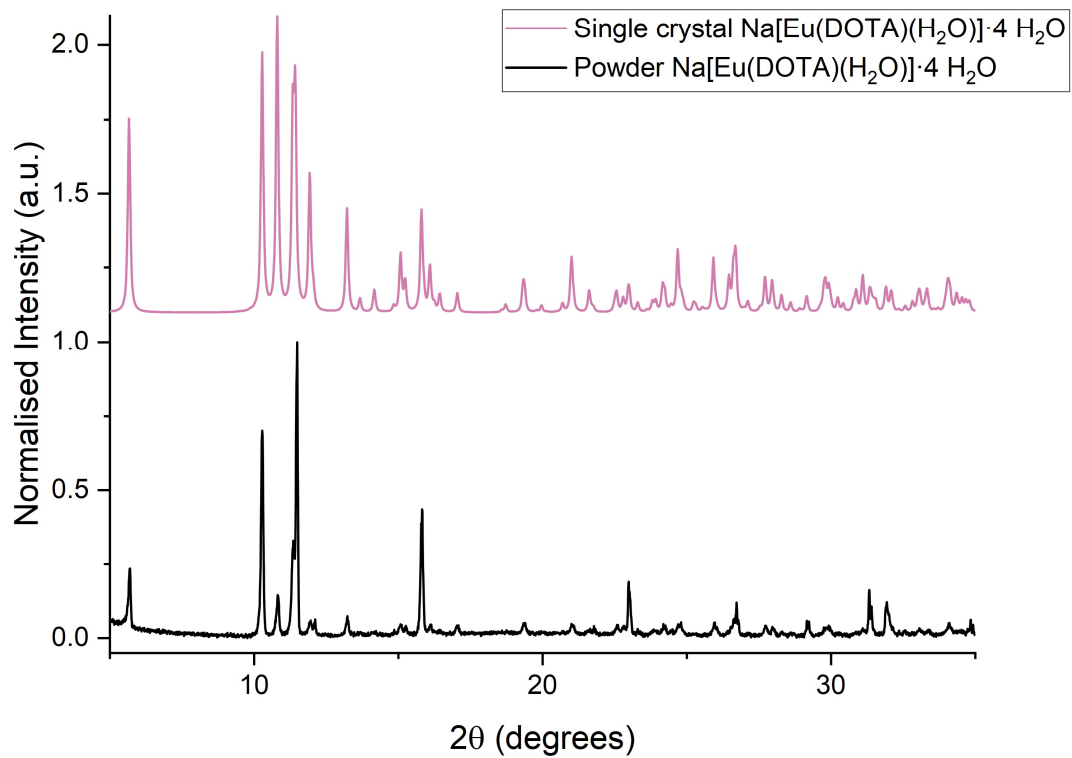

**Figure S 18:** PXRD for Na[Eu(DOTA)H<sub>2</sub>O]·4H<sub>2</sub>O. The black diffractogram is recorded for the powder made from crystals crushed to a powder. The pink diffractogram is simulated from the structure determined for the single crystal.

### 3.1.4 Na[Eu(EDTA)(H<sub>2</sub>O)<sub>3</sub>]·5H<sub>2</sub>O PXRD

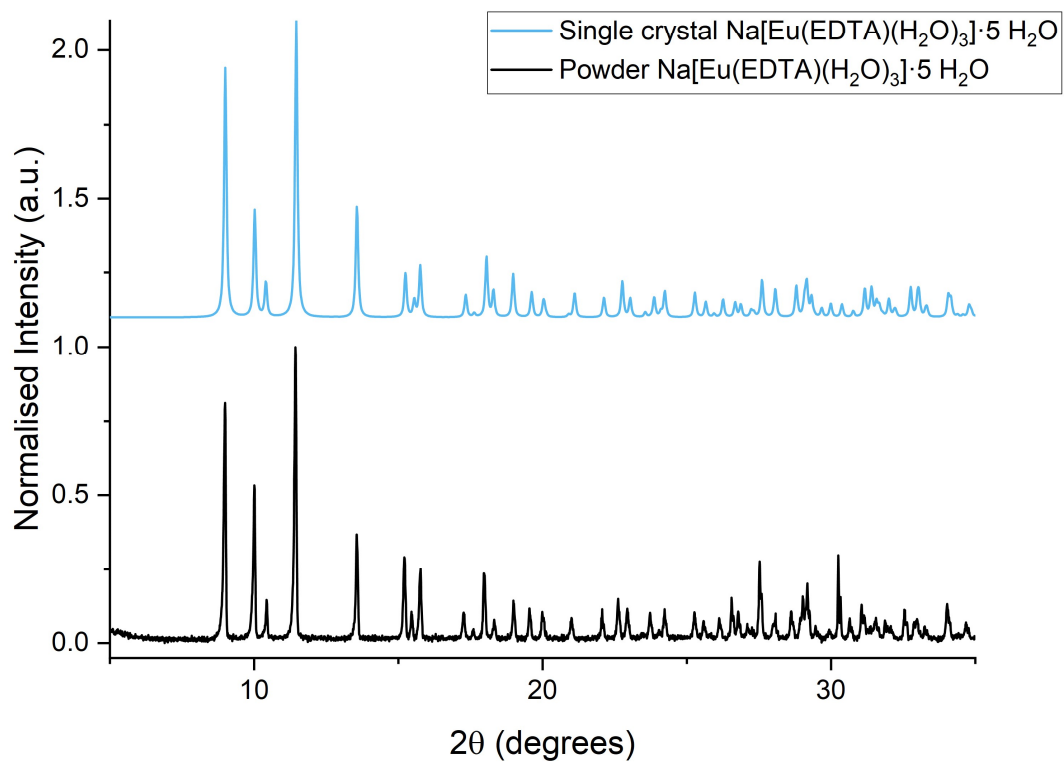

**Figure S 19:** PXRD for Na[Eu(EDTA)(H<sub>2</sub>O)<sub>3</sub>]·5H<sub>2</sub>O. The black diffractogram is recorded for the powder made from crystals crushed to a powder. The light blue diffractogram is simulated from the structure determined for the single crystal.

## 3.2 PXRD $\text{Sm}^{3+}$ Compounds

### 3.2.1 $\text{Cs}_3[\text{Sm}(\text{DPA})_3] \cdot 9\text{H}_2\text{O}$ PXRD

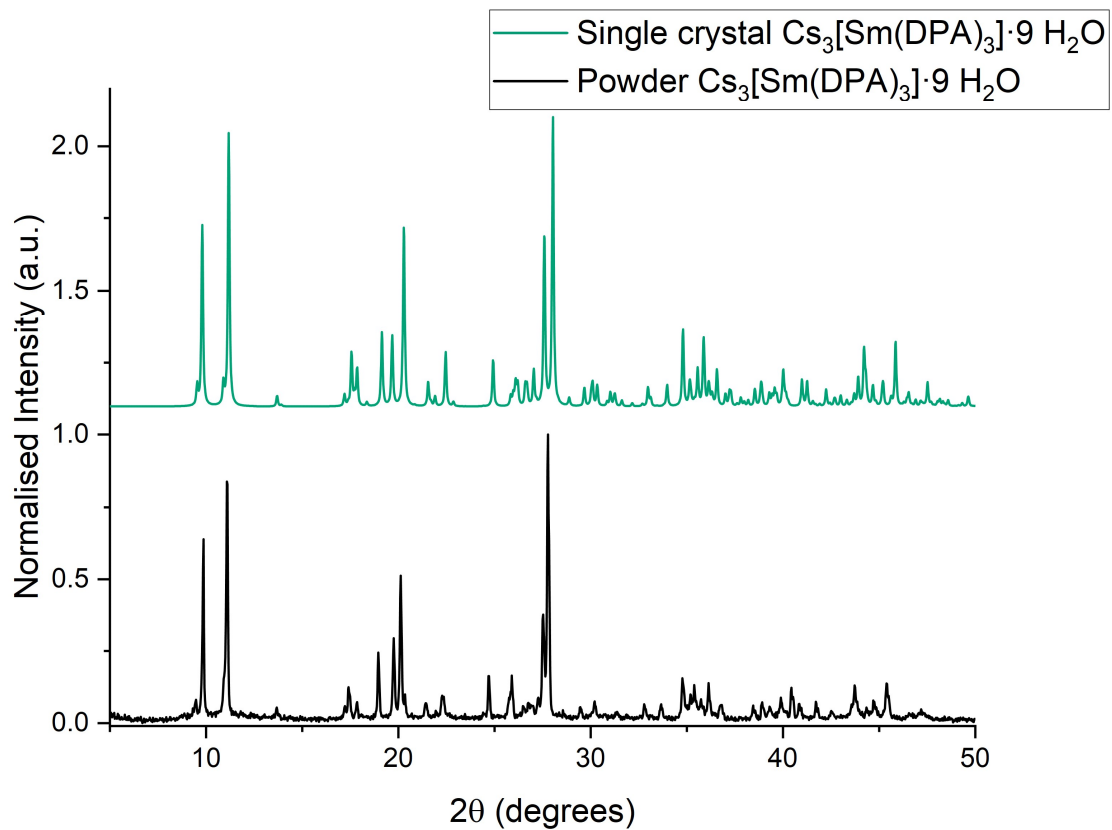

**Figure S 20:** PXRD for  $\text{Cs}_3[\text{Sm}(\text{DPA})_3] \cdot 9\text{H}_2\text{O}$ . The black diffractogram is recorded for the powder made from crystals crushed to a powder. The light blue diffractogram is simulated from the structure determined for the single crystal.

### 3.2.2 Na[Sm(DOTA)H<sub>2</sub>O]·4H<sub>2</sub>O PXRD

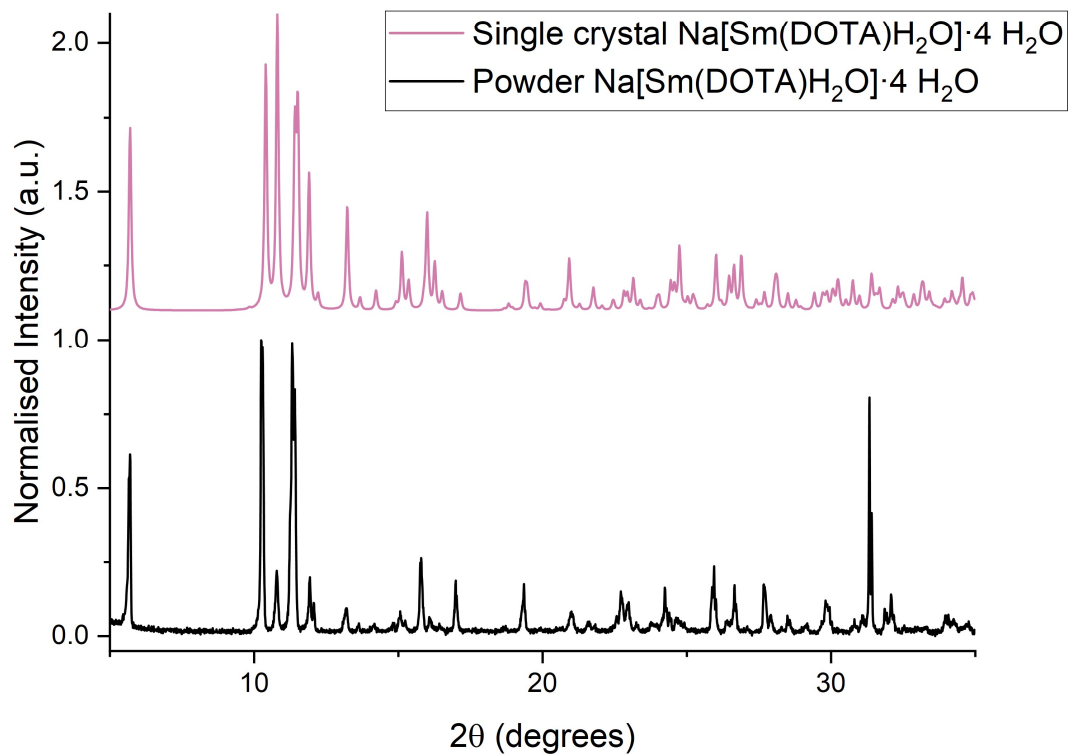

**Figure S 21:** PXRD for Na[Sm(DOTA)H<sub>2</sub>O]·4H<sub>2</sub>O. The black diffractogram is recorded for the powder made from crystals crushed to a powder. The light blue diffractogram is simulated from the structure determined for the single crystal.

### 3.2.3 Na[Sm(EDTA)H<sub>2</sub>O]·5H<sub>2</sub>O PXRD

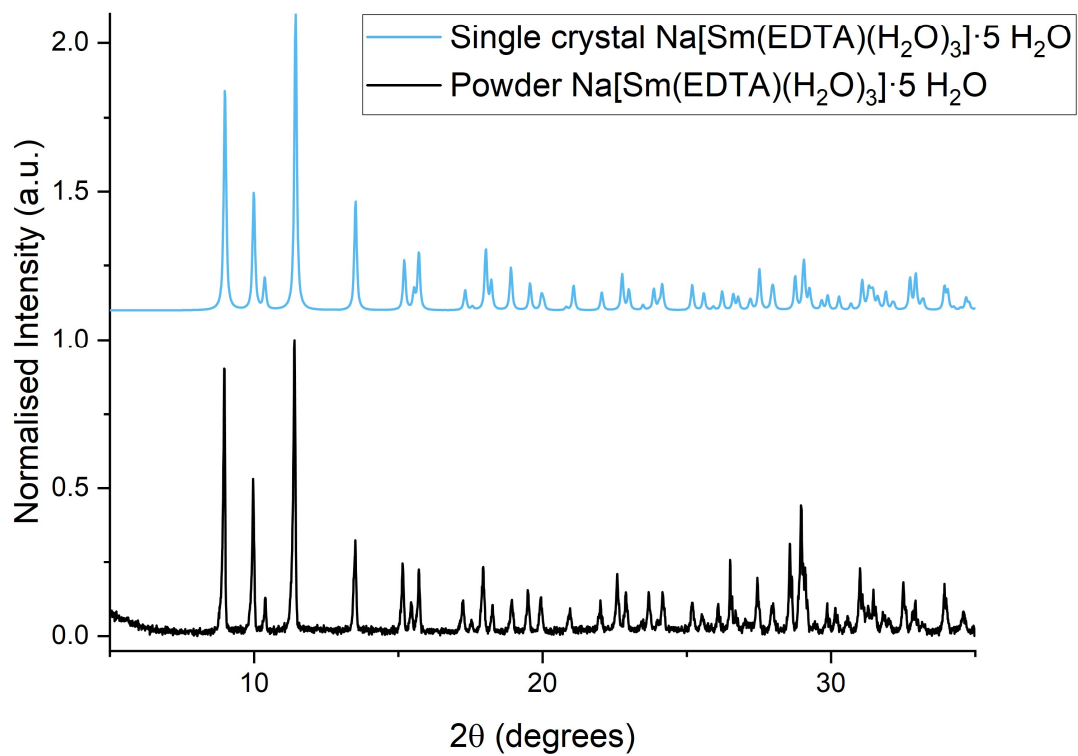

**Figure S 22:** PXRD for Na[Sm(EDTA)(H<sub>2</sub>O)<sub>3</sub>]·5H<sub>2</sub>O. The black diffractogram is recorded for the powder made from crystals crushed to a powder. The light blue diffractogram is simulated from the structure determined for the single crystal.

## 4 Spectroscopy Data

### 4.1 Experimental Setup for Solid State Single Crystal Luminescence

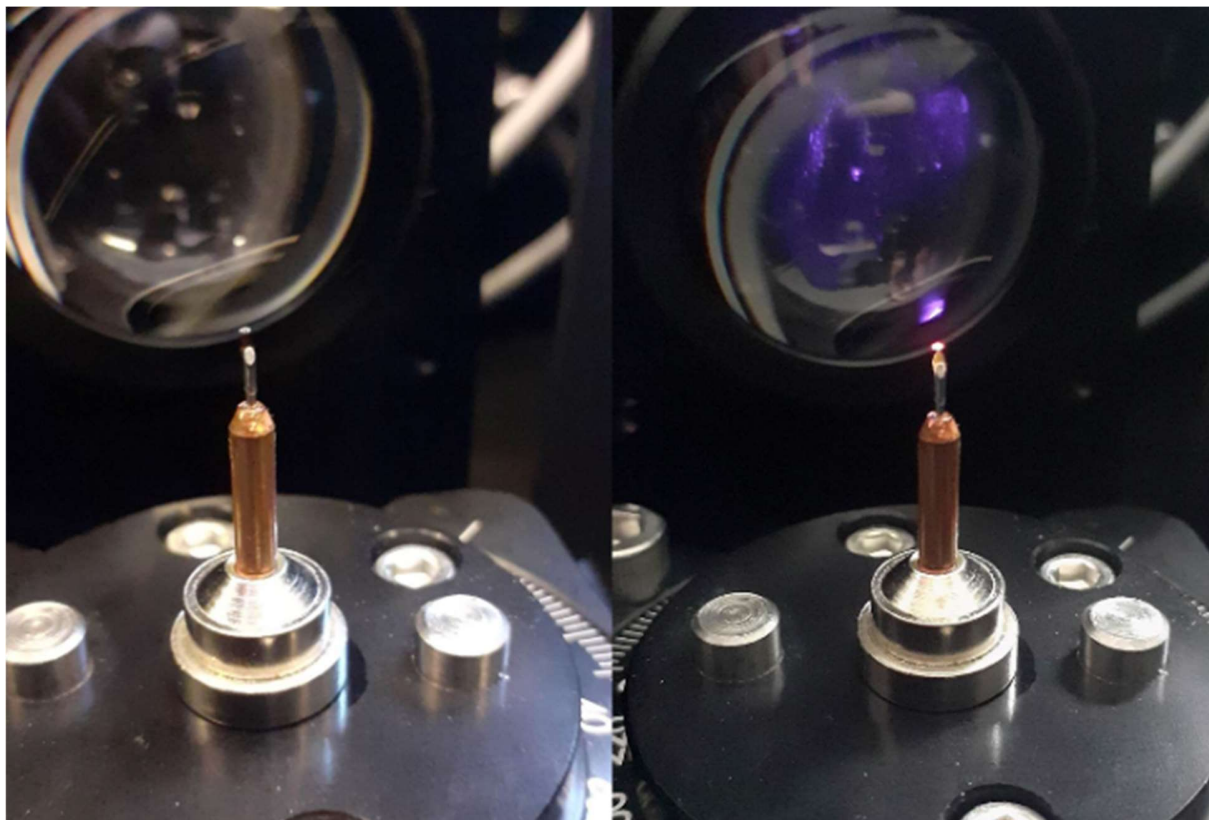

**Figure S 23:** Solid-state single crystal emission setup using a crystal mounting loop. Emission was measured at 293 K. The picture shows a  $\text{Cs}_3[\text{Eu}(\text{DPA})_3] \cdot 9\text{H}_2\text{O}$  crystal. The picture to the right show excitation at 394 nm.



## 4.2 Spectroscopy Data for Eu<sup>3+</sup> Compounds

### 4.2.1 Luminescence Lifetimes for Eu<sup>3+</sup> Compounds

**Table S 14:** Luminescence lifetimes of the Eu<sup>3+</sup> complexes for crystals ground to a powder in 2-methyltetrahydrofuran at 77 K.

| Complex                                                        | $\tau_{obs}$ ( $\mu$ s) |
|----------------------------------------------------------------|-------------------------|
| Na <sub>3</sub> [Eu(ODA) <sub>3</sub> ]·8H <sub>2</sub> O      | 2860.21                 |
| Cs <sub>3</sub> [Eu(DPA) <sub>3</sub> ]·9H <sub>2</sub> O      | 1697.99                 |
| Na[Eu(DOTA)(H <sub>2</sub> O)]·4H <sub>2</sub> O               | 731.06                  |
| Na[Eu(EDTA)(H <sub>2</sub> O) <sub>3</sub> ]·5H <sub>2</sub> O | 364.10                  |

**Table S 15:** Luminescence lifetimes of the Eu<sup>3+</sup> complexes for single crystals at 293 K.

| Complex                                                        | $\tau_{obs}$ ( $\mu$ s) |
|----------------------------------------------------------------|-------------------------|
| Na <sub>3</sub> [Eu(ODA) <sub>3</sub> ]·8H <sub>2</sub> O      | 1965.36                 |
| Cs <sub>3</sub> [Eu(DPA) <sub>3</sub> ]·9H <sub>2</sub> O      | 1415.91                 |
| Na[Eu(DOTA)(H <sub>2</sub> O)]·4H <sub>2</sub> O               | 748.44                  |
| Na[Eu(EDTA)(H <sub>2</sub> O) <sub>3</sub> ]·5H <sub>2</sub> O | 355.38                  |

## 4.2.2 $\text{Na}_3[\text{Eu}(\text{ODA})_3] \cdot 8\text{H}_2\text{O}$ Spectra

### 4.2.2.1 $\text{Na}_3[\text{Eu}(\text{ODA})_3] \cdot 8\text{H}_2\text{O}$ Emission Spectra

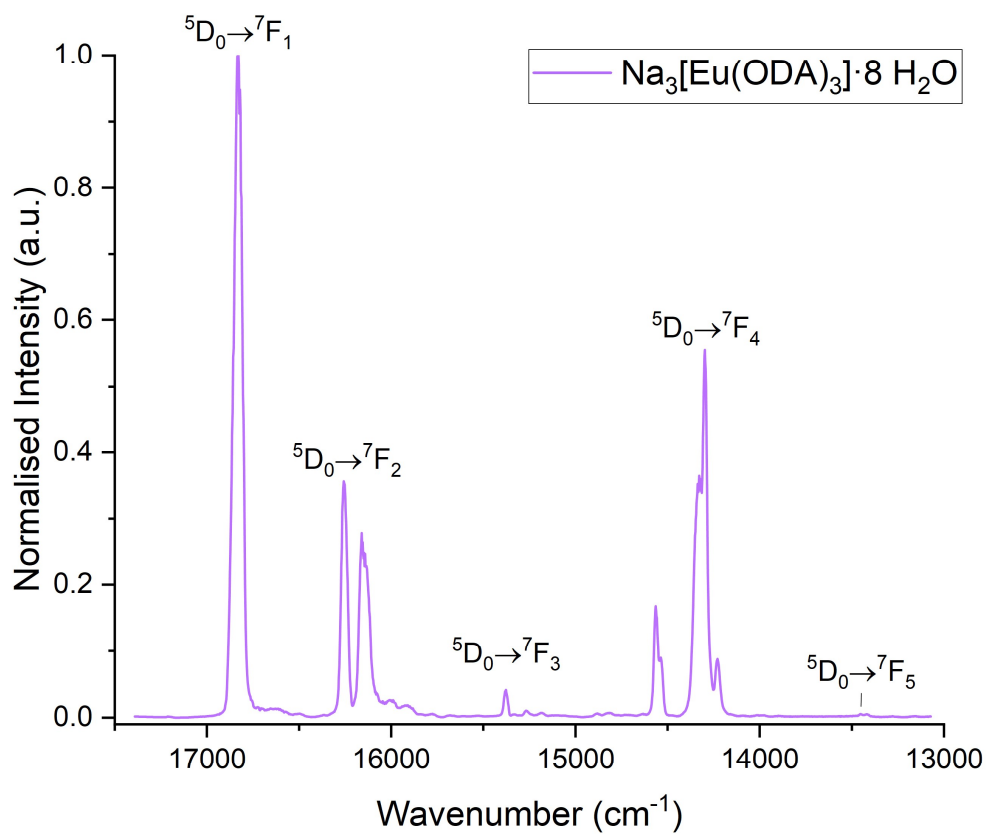

**Figure S 24:** Normalised emission spectrum (excitation at 394 nm) for  $\text{Na}_3[\text{Eu}(\text{ODA})_3] \cdot 8\text{H}_2\text{O}$  in 2-methyltetrahydrofuran glass at 77 K.

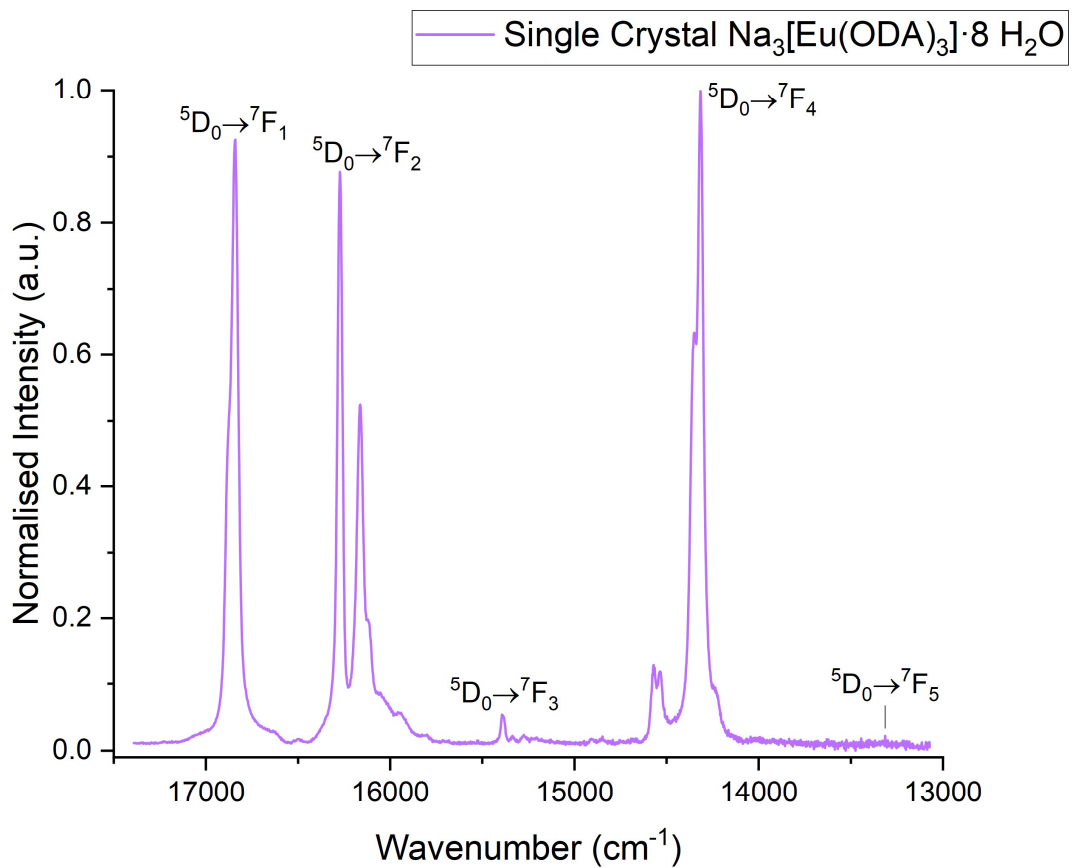

**Figure S 25:** Normalised emission spectrum (excitation at 394 nm) for single crystal  $\text{Na}_3[\text{Eu}(\text{ODA})_3] \cdot 8\text{H}_2\text{O}$  at 293 K.

#### 4.2.2.2 $\text{Na}_3[\text{Eu}(\text{ODA})_3] \cdot 8\text{H}_2\text{O}$ Excitation Spectra

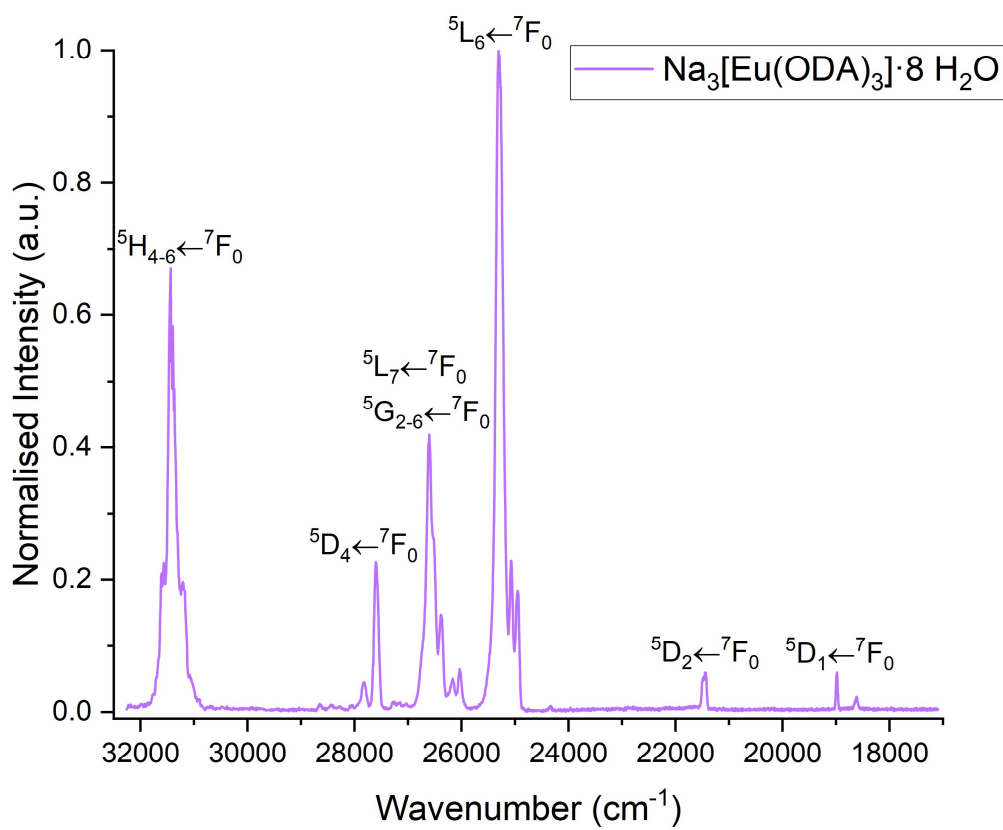

**Figure S 26:** Normalised excitation spectra (emission at 614 nm) for  $\text{Na}_3[\text{Eu}(\text{ODA})_3] \cdot 8\text{H}_2\text{O}$  in 2-methyltetrahydrofuran glass at 77 K.

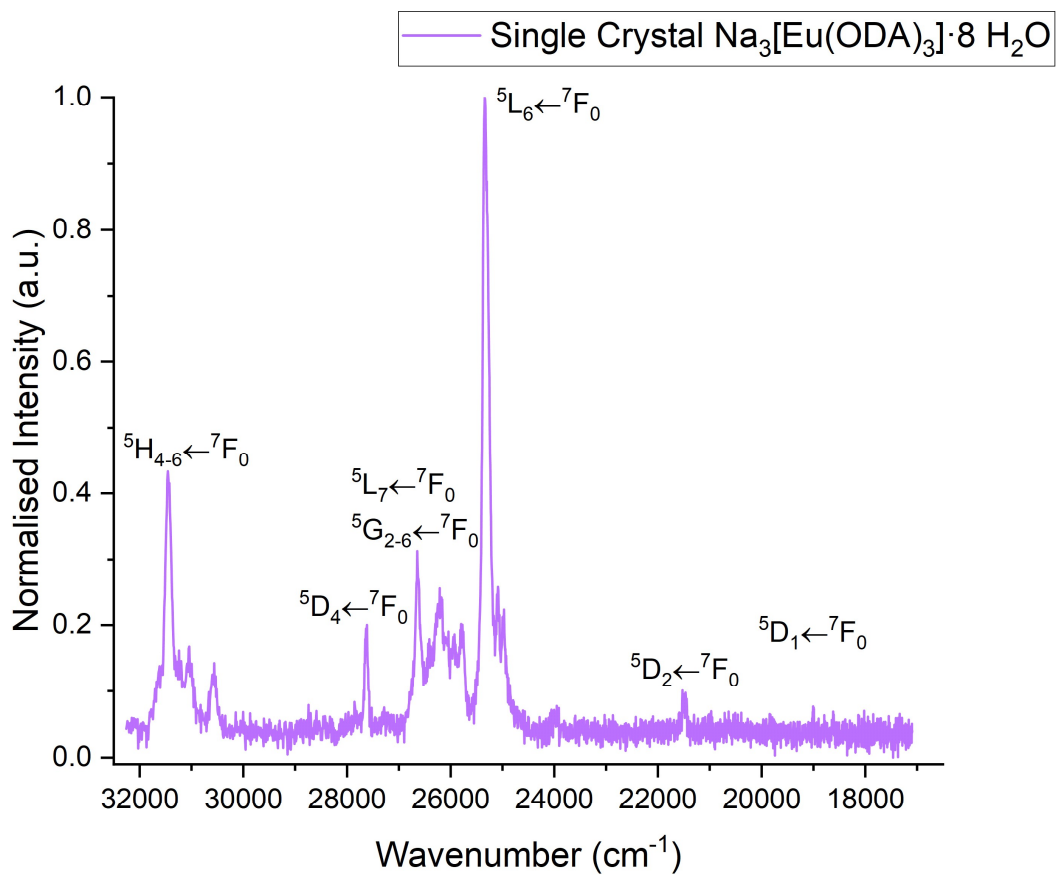

**Figure S 27:** Normalised excitation spectra (emission at 614 nm) for single crystal  $\text{Na}_3[\text{Eu}(\text{ODA})_3] \cdot 8\text{H}_2\text{O}$  at 293 K.

### 4.2.2.3 $\text{Na}_3[\text{Eu}(\text{ODA})_3] \cdot 8\text{H}_2\text{O}$ Luminescence Lifetimes

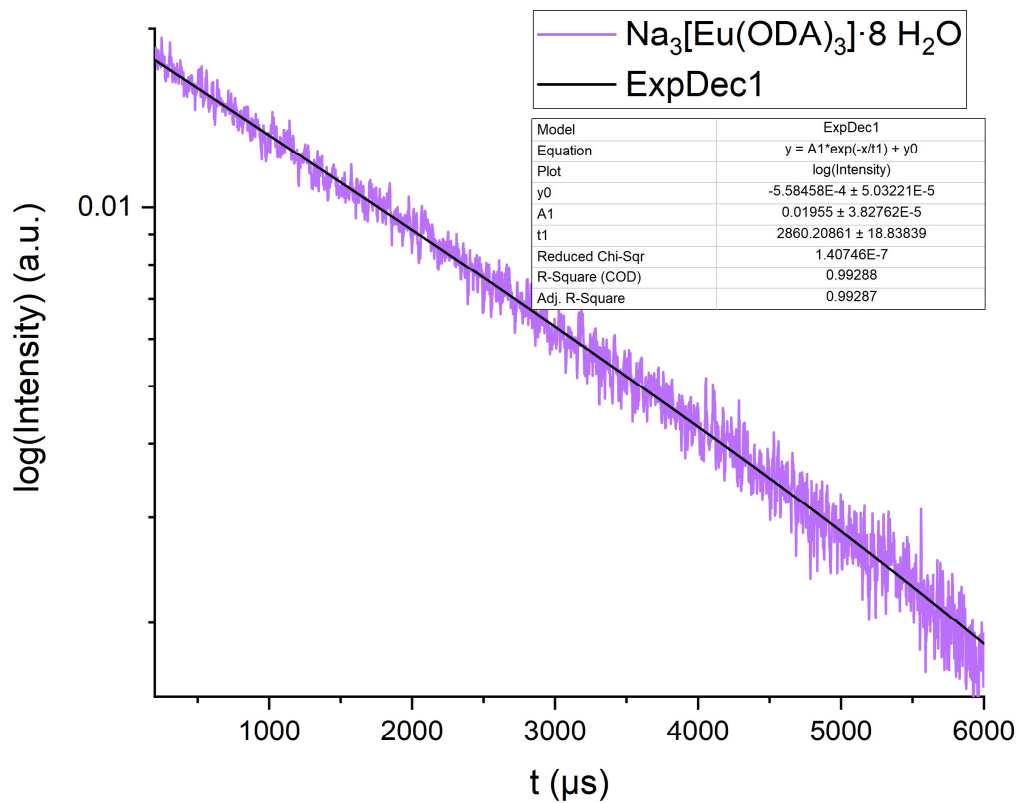

**Figure S 28:**  $\text{Na}_3[\text{Eu}(\text{ODA})_3] \cdot 8\text{H}_2\text{O}$  luminescence lifetime in 2-methyltetrahydrofuran glass at 77 K. Fitted using OriginPro's ExpDec1 function.

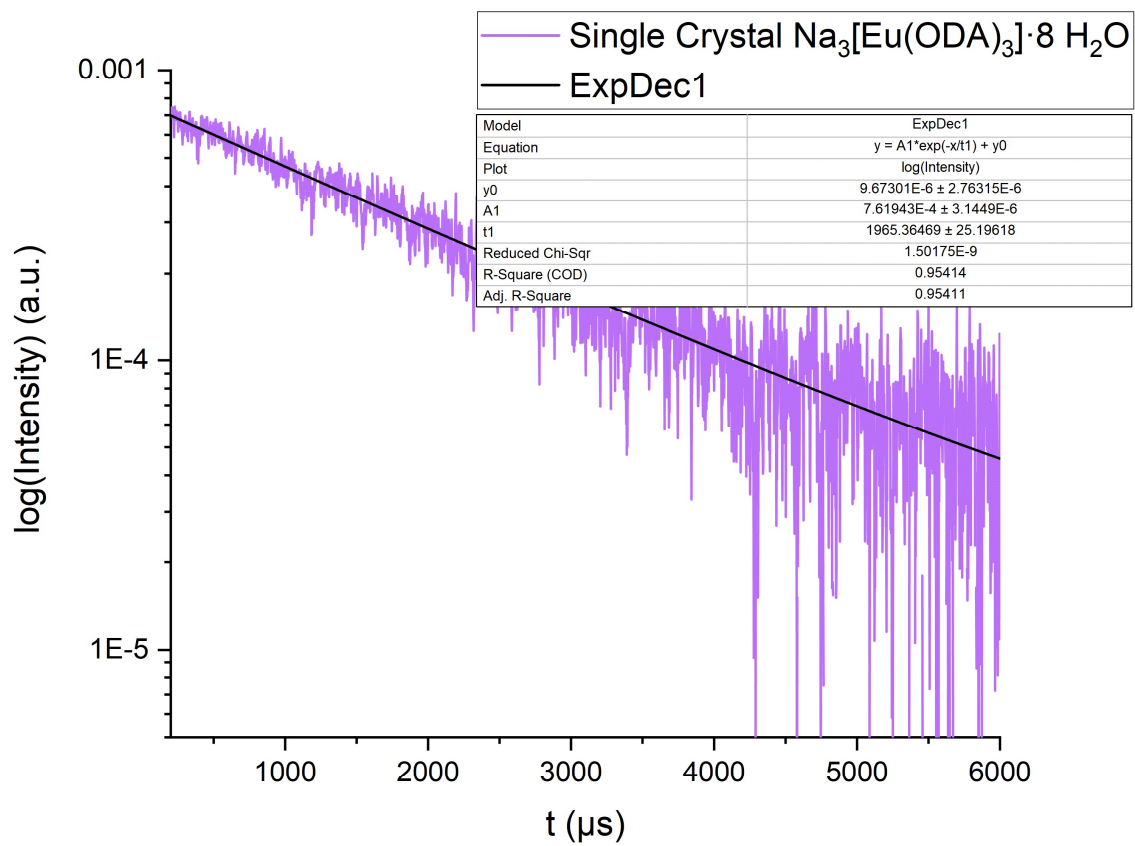

**Figure S 29:**  $\text{Na}_3[\text{Eu}(\text{ODA})_3] \cdot 8\text{H}_2\text{O}$  single crystal luminescence lifetime at 293 K. Fitted using OriginPro's ExpDec1 function.

## 4.2.3 Cs<sub>3</sub>[Eu(DPA)<sub>3</sub>]·9H<sub>2</sub>O Spectra

### 4.2.3.1 Cs<sub>3</sub>[Eu(DPA)<sub>3</sub>]·9H<sub>2</sub>O Emission Spectra

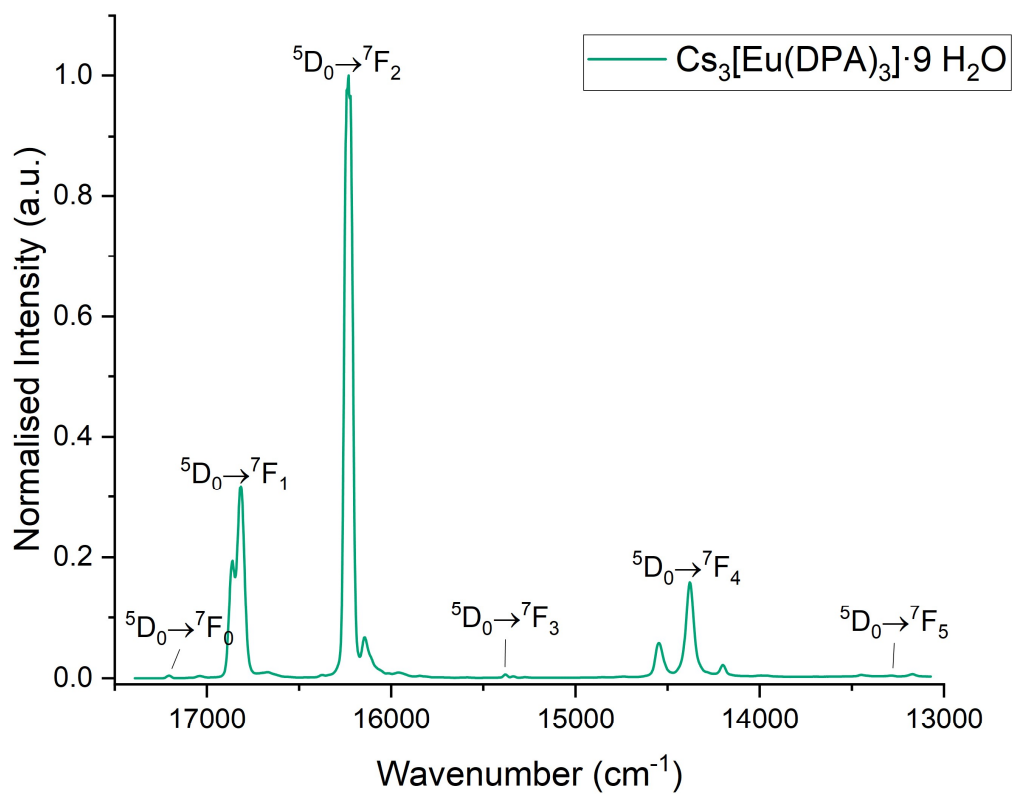

**Figure S 30:** Normalised emission spectrum (excitation at 394 nm) for Cs<sub>3</sub>[Eu(DPA)<sub>3</sub>]·9H<sub>2</sub>O in 2-methyltetrahydrofuran glass at 77 K.



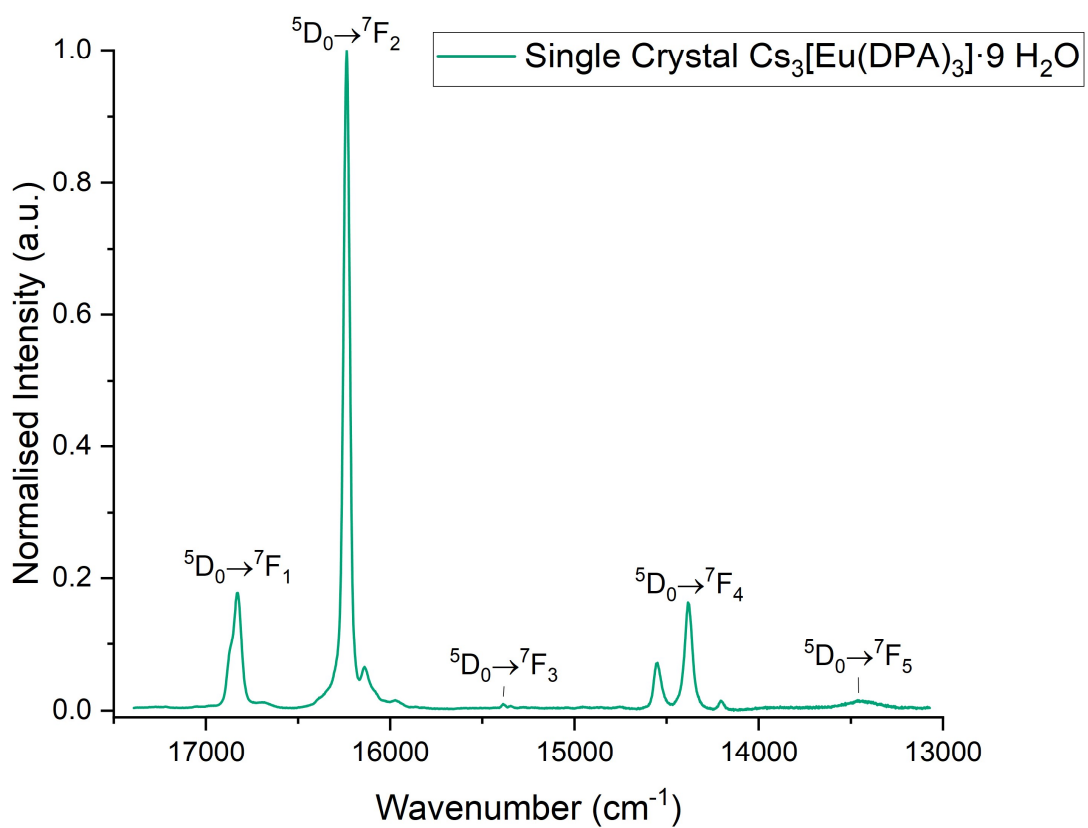

**Figure S 31:** Normalised emission spectrum (excitation at 394 nm) for single crystal  $\text{Cs}_3[\text{Eu}(\text{DPA})_3] \cdot 9\text{H}_2\text{O}$  at 293 K.

#### 4.2.3.2 Cs<sub>3</sub>[Eu(DPA)<sub>3</sub>]·9H<sub>2</sub>O Excitation Spectra

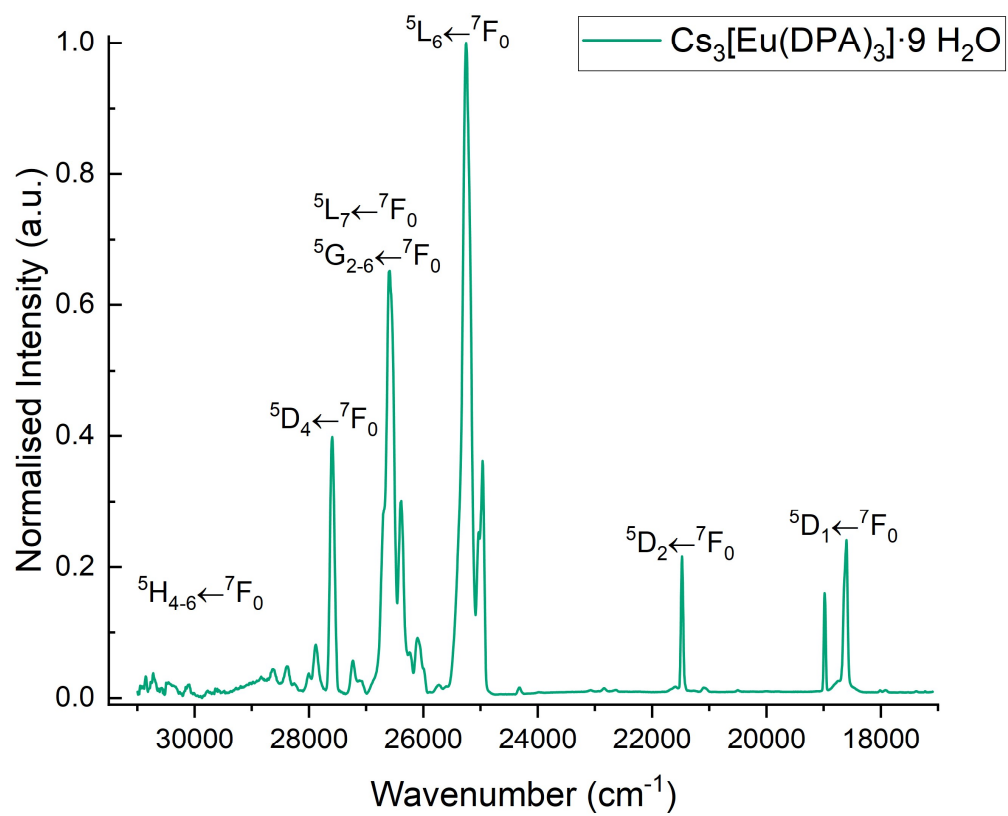

**Figure S 32:** Normalised excitation spectra (emission at 614 nm) for Cs<sub>3</sub>[Eu(DPA)<sub>3</sub>]·9H<sub>2</sub>O in 2-methyltetrahydrofuran glass at 77 K.

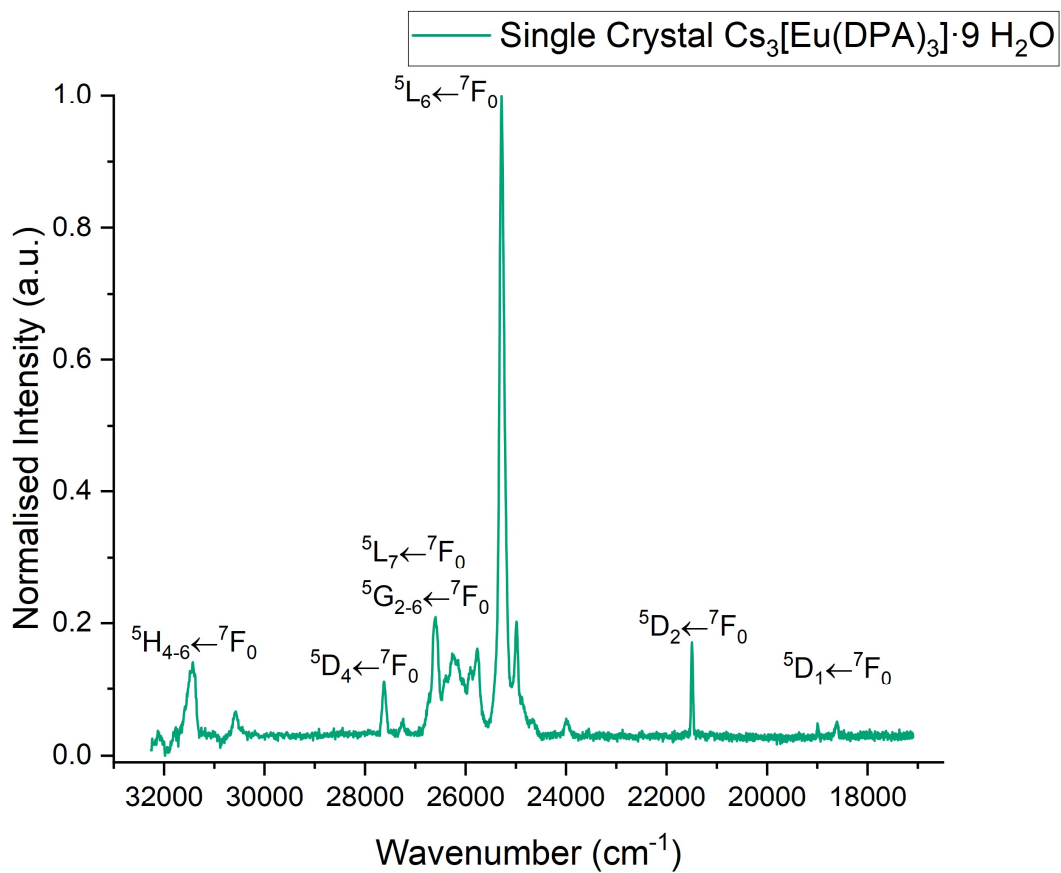

**Figure S 33:** Normalised excitation spectra (emission at 614 nm) for single crystal  $\text{Cs}_3[\text{Eu}(\text{DPA})_3]$  at 293 K.

### 4.2.3.3 Cs<sub>3</sub>[Eu(DPA)<sub>3</sub>]·9H<sub>2</sub>O Luminescence Lifetimes

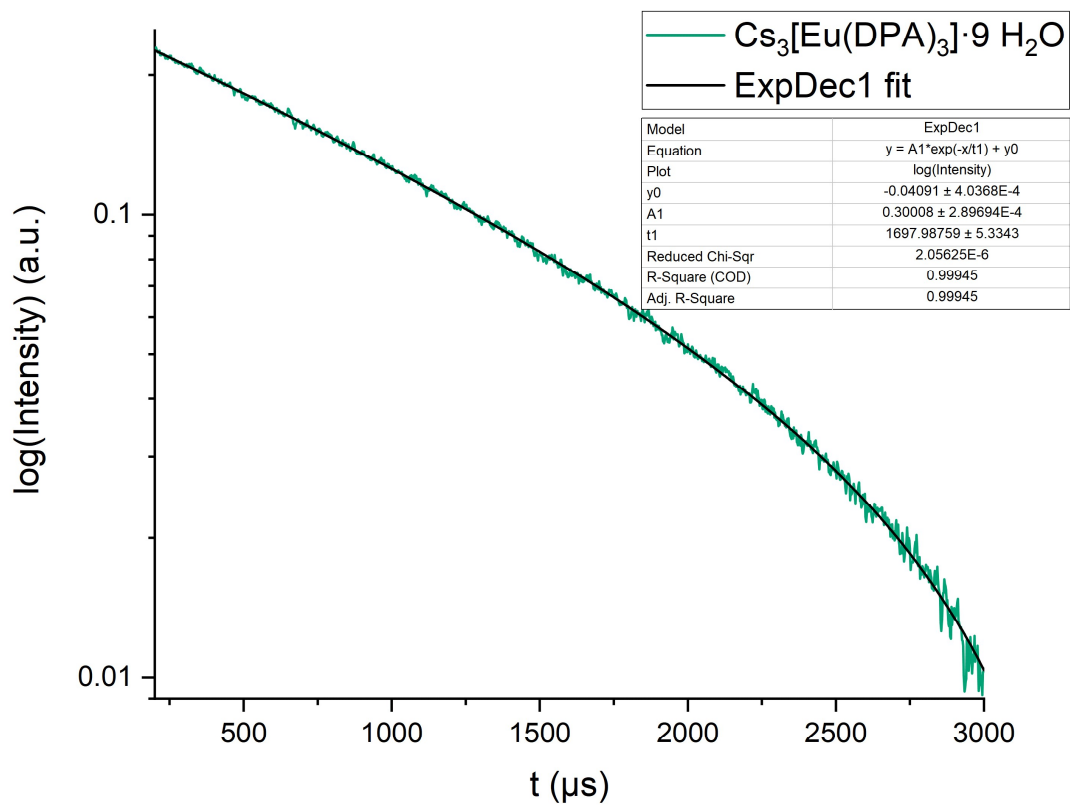

**Figure S 34:** Cs<sub>3</sub>[Eu(DPA)<sub>3</sub>]·9H<sub>2</sub>O luminescence lifetime in 2-methyltetrahydrofuran glass at 77 K. Fitted using OriginPro's ExpDec1 function.

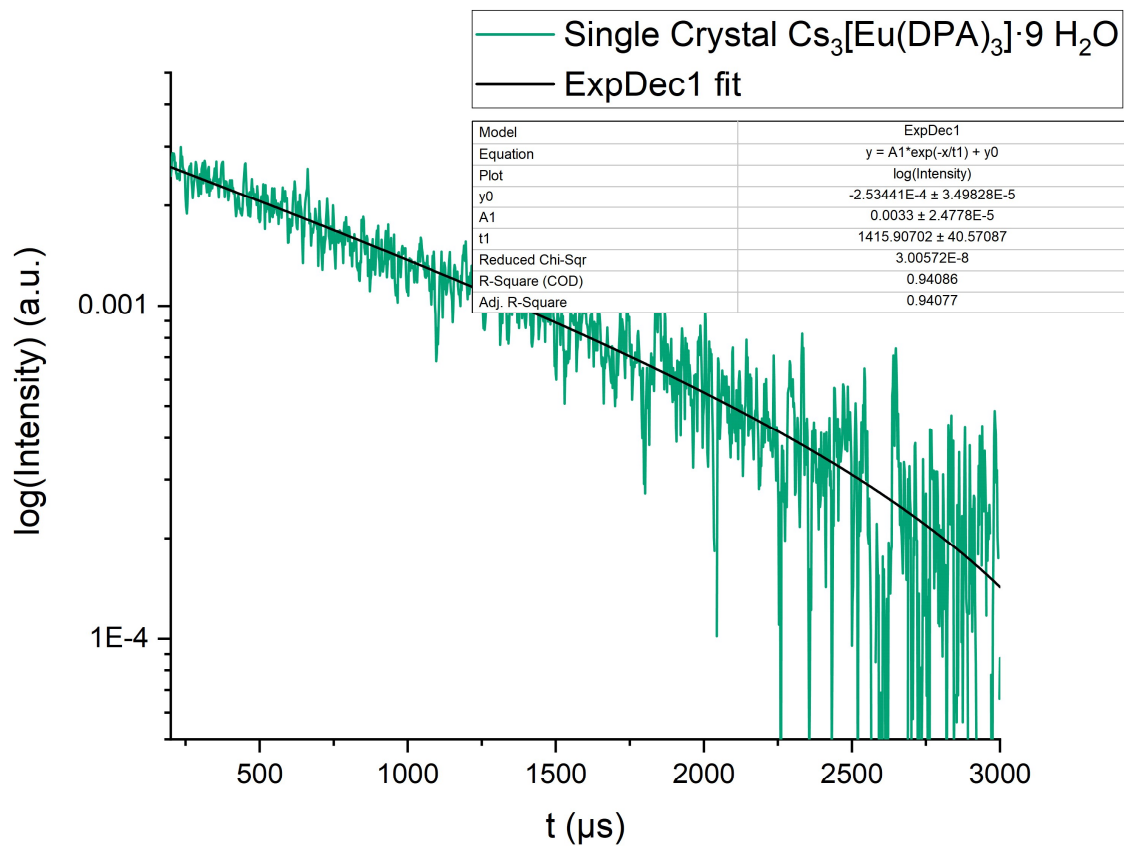

**Figure S 35:**  $\text{Cs}_3[\text{Eu}(\text{DPA})_3] \cdot 9\text{H}_2\text{O}$  single crystal luminescence lifetime at 293 K. Fitted using OriginPro's ExpDec1 function.

## 4.2.4 Na[Eu(DOTA)H<sub>2</sub>O]·4H<sub>2</sub>O Spectra

### 4.2.4.1 Na[Eu(DOTA)H<sub>2</sub>O]·4H<sub>2</sub>O Emission Spectra

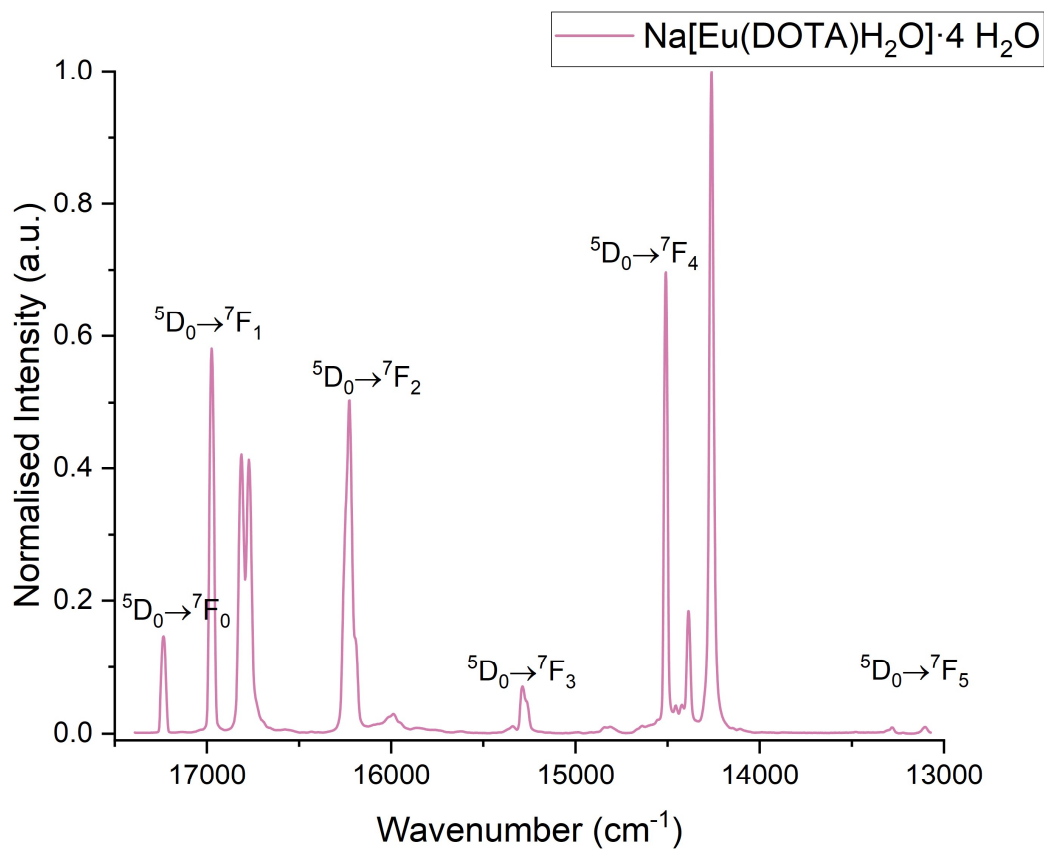

**Figure S 36:** Normalised emission spectrum (excitation at 394 nm) for Na[Eu(DOTA)H<sub>2</sub>O]·4H<sub>2</sub>O in 2-methyltetrahydrofuran glass at 77 K.

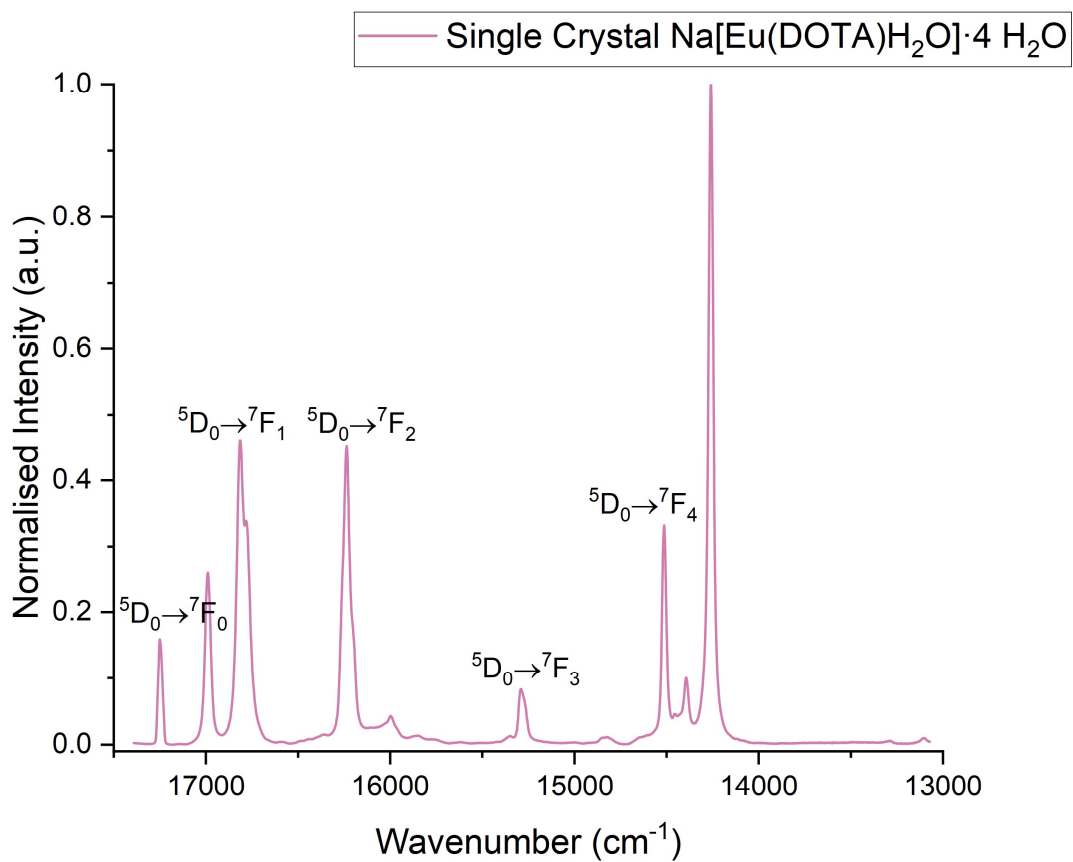

**Figure S 37:** Normalised emission spectrum (excitation at 394 nm) for single crystal  $\text{Na}[\text{Eu}(\text{DOTA})\text{H}_2\text{O}] \cdot 4\text{H}_2\text{O}$  at 293 K.

#### 4.2.5 Na[Eu(DOTA)H<sub>2</sub>O]·4H<sub>2</sub>O Excitation Spectra

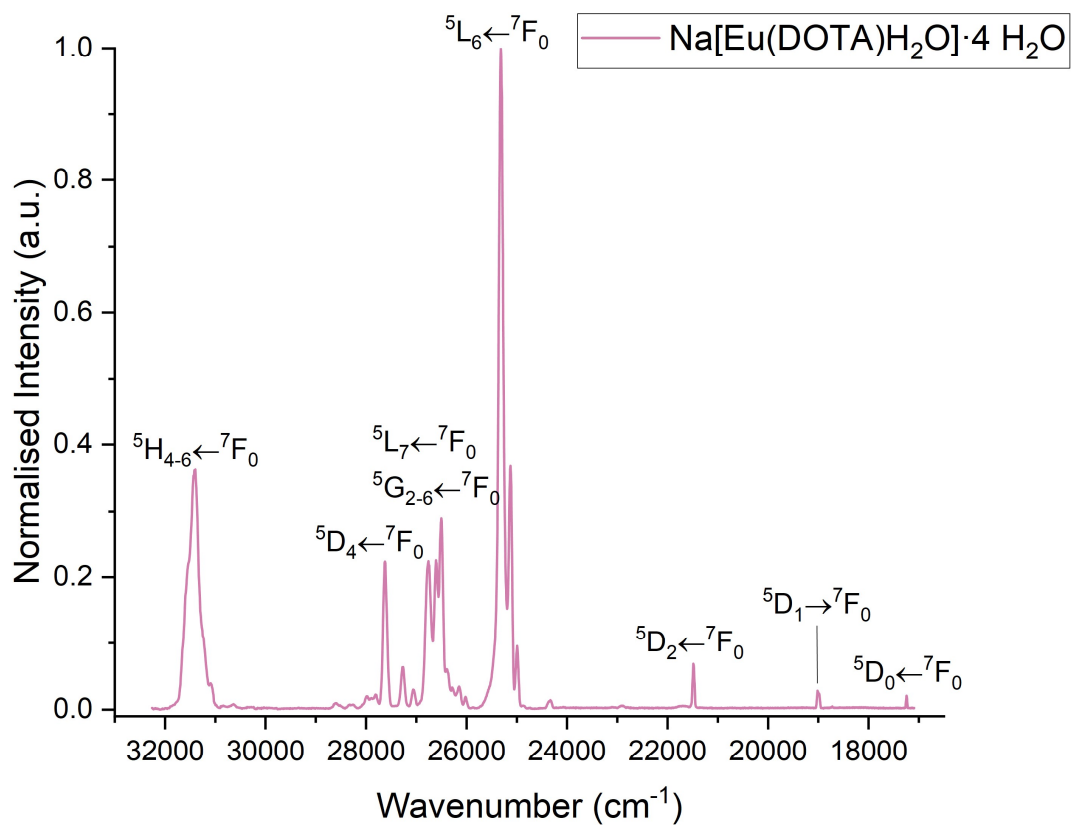

**Figure S 38:** Normalised excitation spectra (emission at 614 nm) for Na[Eu(DOTA)H<sub>2</sub>O]·4H<sub>2</sub>O in 2-methyltetrahydrofuran glass at 77 K.



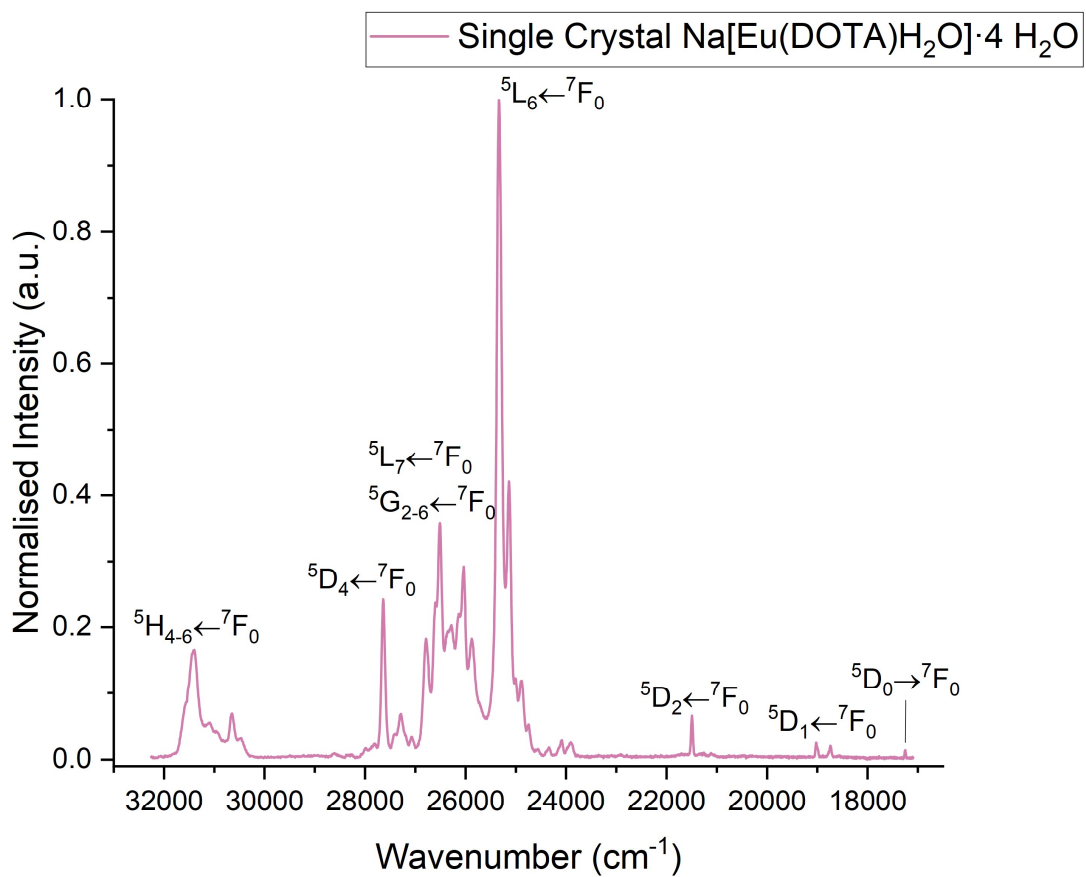

**Figure S 39:** Normalised excitation spectra (emission at 614 nm) for single crystal Na[Eu(DOTA)H<sub>2</sub>O]·4H<sub>2</sub>O at 293 K.

#### 4.2.5.1 Na[Eu(DOTA)H<sub>2</sub>O]·4H<sub>2</sub>O Luminescence Lifetimes

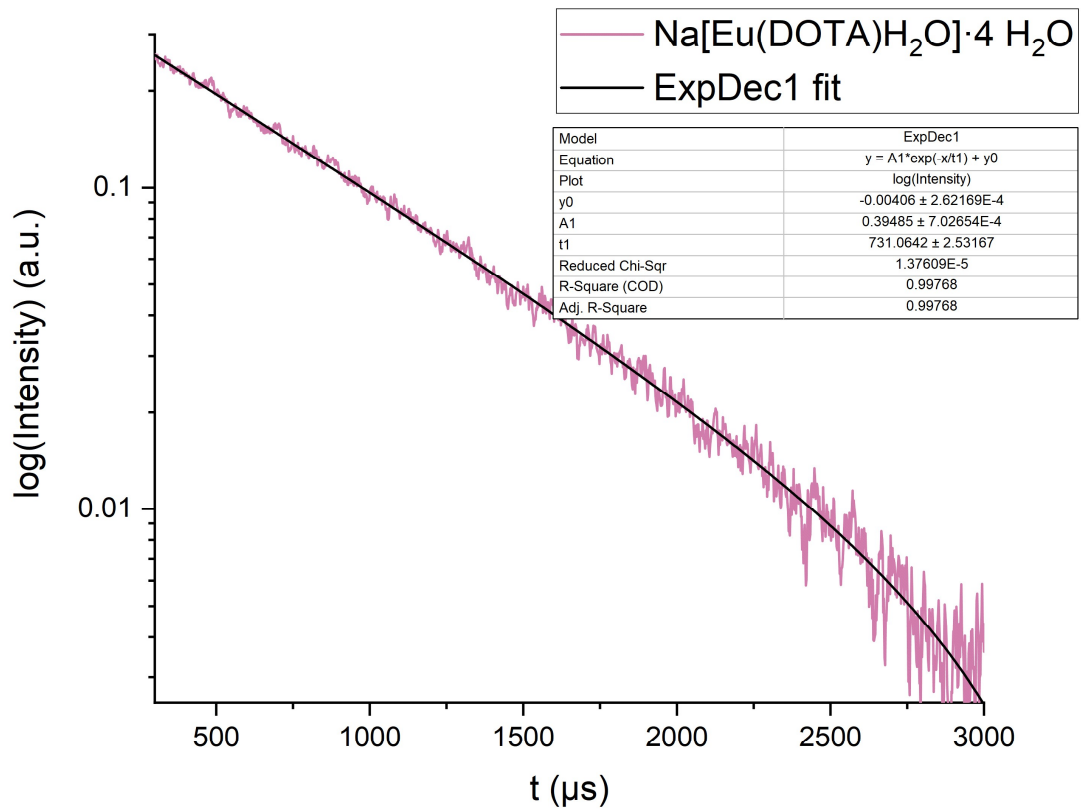

**Figure S 40:** Na[Eu(DOTA)H<sub>2</sub>O]·4H<sub>2</sub>O luminescence lifetime in 2-methyltetrahydrofuran glass at 77 K. Fitted using OriginPro's ExpDec1 function.

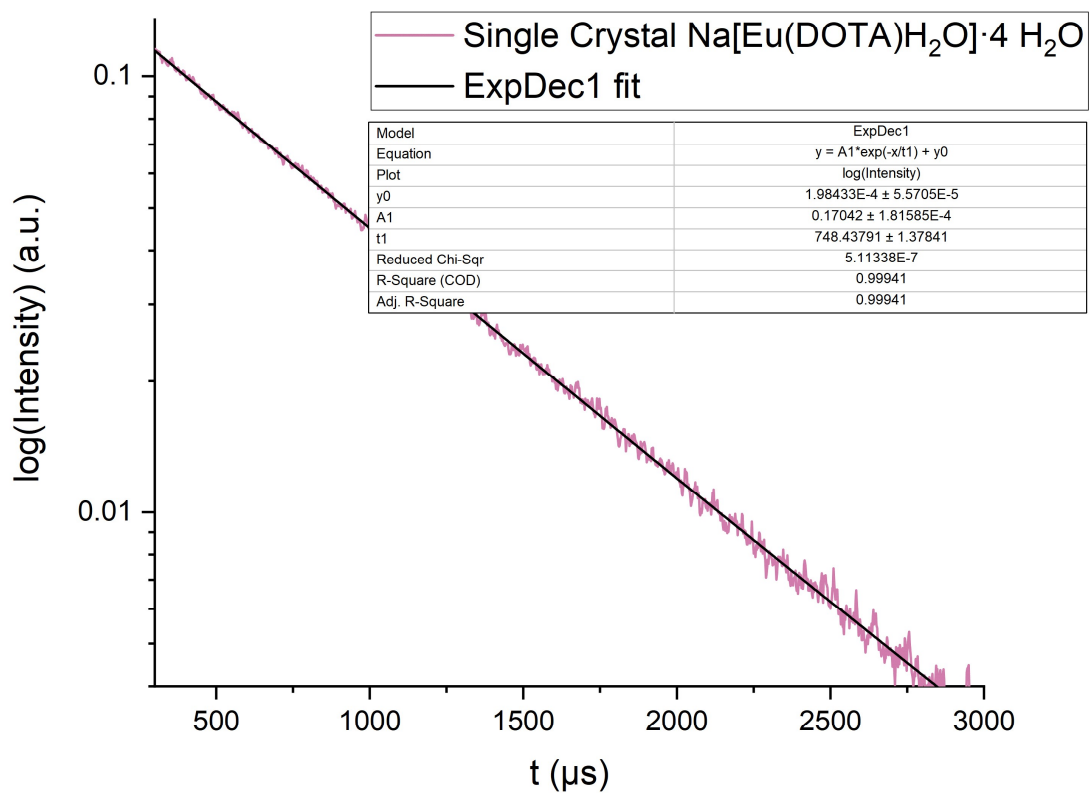

**Figure S 41:** Na[Eu(DOTA)H<sub>2</sub>O]·4H<sub>2</sub>O single crystal luminescence lifetime at 293 K. Fitted using OriginPro's ExpDec1 function.

## 4.2.6 Na[Eu(EDTA)(H<sub>2</sub>O)<sub>3</sub>]·5H<sub>2</sub>O Spectra

### 4.2.6.1 Na[Eu(EDTA)(H<sub>2</sub>O)<sub>3</sub>]·5H<sub>2</sub>O Emission Spectra

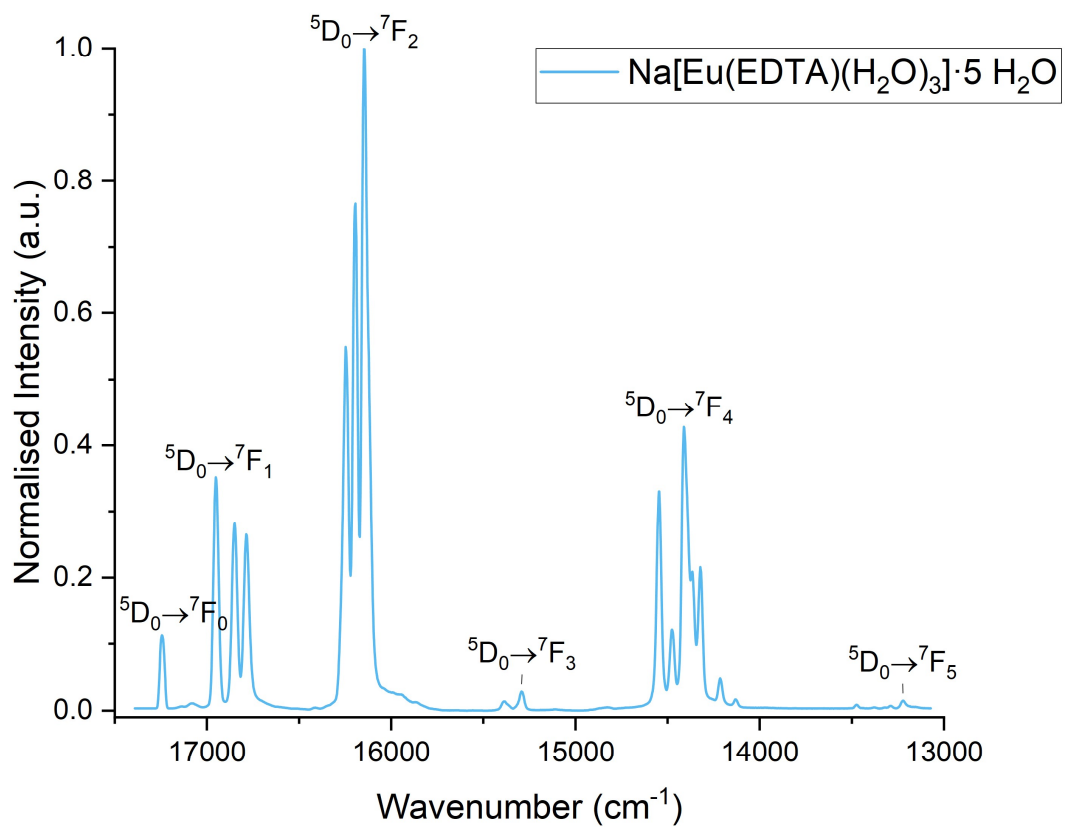

**Figure S 42:** Normalised emission spectrum (excitation at 394 nm) for Na[Eu(EDTA)(H<sub>2</sub>O)<sub>3</sub>]·5H<sub>2</sub>O in 2-methyltetrahydrofuran glass at 77 K.

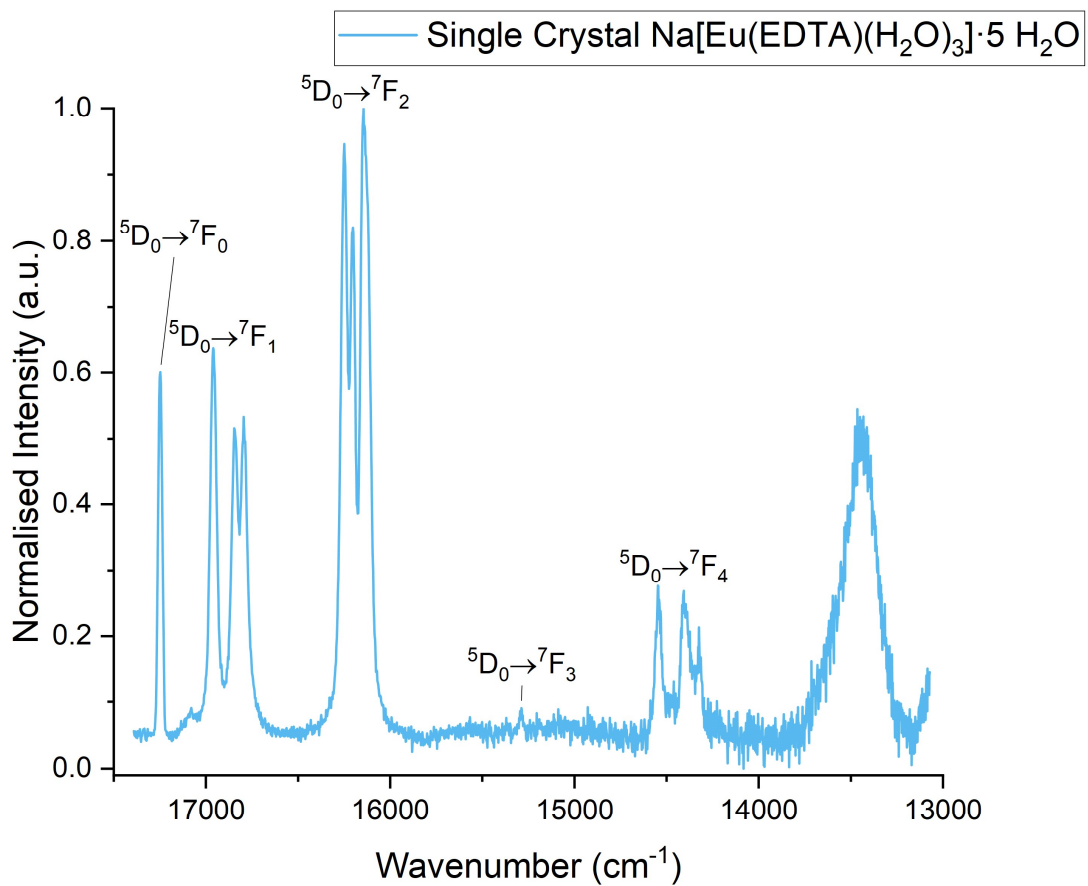

**Figure S 43:** Normalised emission spectrum (excitation at 394 nm) for single crystal Na[Eu(EDTA)(H<sub>2</sub>O)<sub>3</sub>]·5H<sub>2</sub>O at 293 K.

#### 4.2.6.2 Na[Eu(EDTA)(H<sub>2</sub>O)<sub>3</sub>]·5H<sub>2</sub>O Excitation Spectra

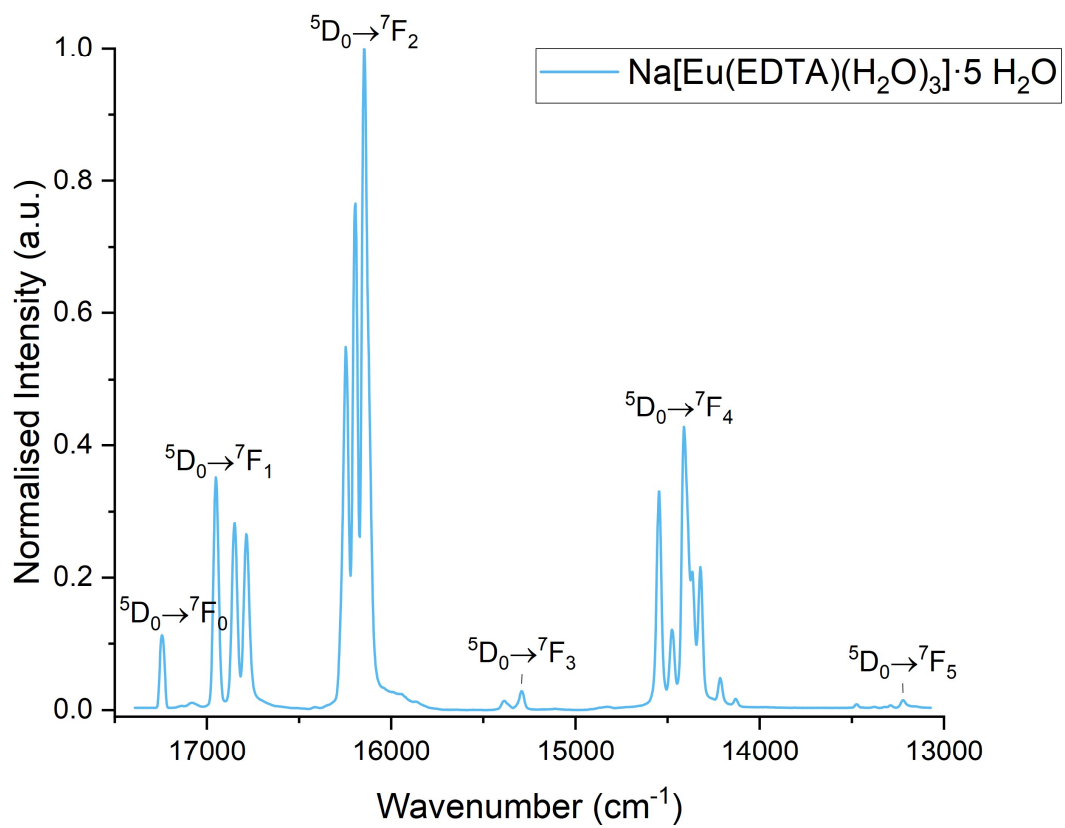

**Figure S 44:** Normalised excitation spectra (emission at 614 nm) for Na[Eu(EDTA)(H<sub>2</sub>O)<sub>3</sub>]·5H<sub>2</sub>O in 2-methyl tetrahydrofuran glass at 77 K.

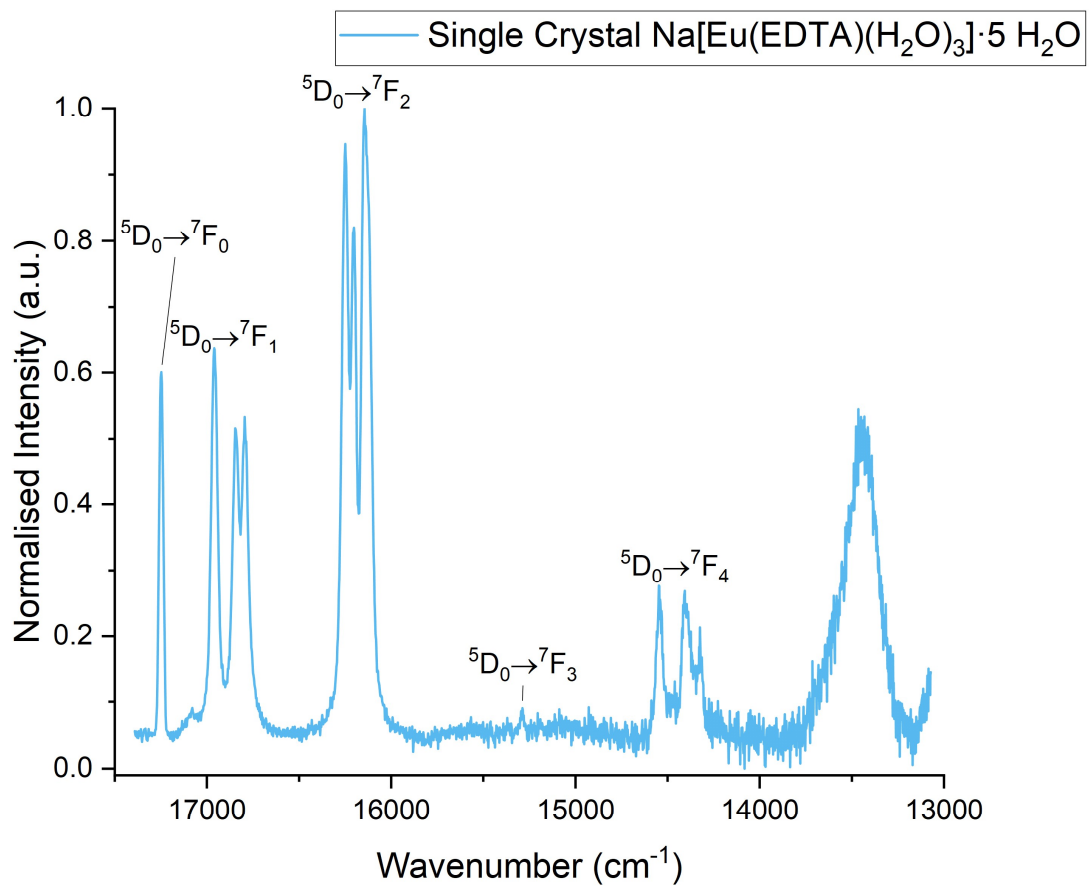

**Figure S 45:** Normalised excitation spectra (emission at 614 nm) for single crystal Na[Eu(EDTA)(H<sub>2</sub>O)<sub>3</sub>]·5H<sub>2</sub>O at 293 K.

#### 4.2.6.3 Na[Eu(EDTA)(H<sub>2</sub>O)<sub>3</sub>]·5H<sub>2</sub>O Luminescence Lifetimes

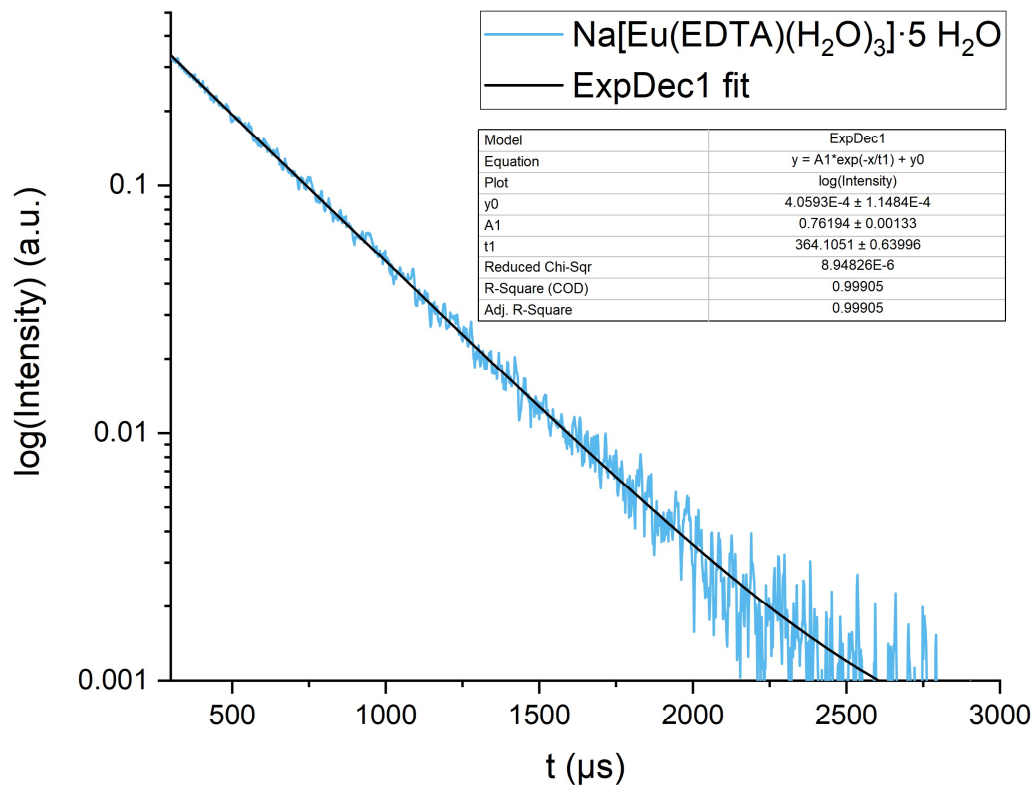

**Figure S 46:** Na[Eu(EDTA)(H<sub>2</sub>O)<sub>3</sub>]·5H<sub>2</sub>O luminescence lifetime in 2-methyltetrahydrofuran glass at 77 K. Fitted using OriginPro's ExpDec1 function.



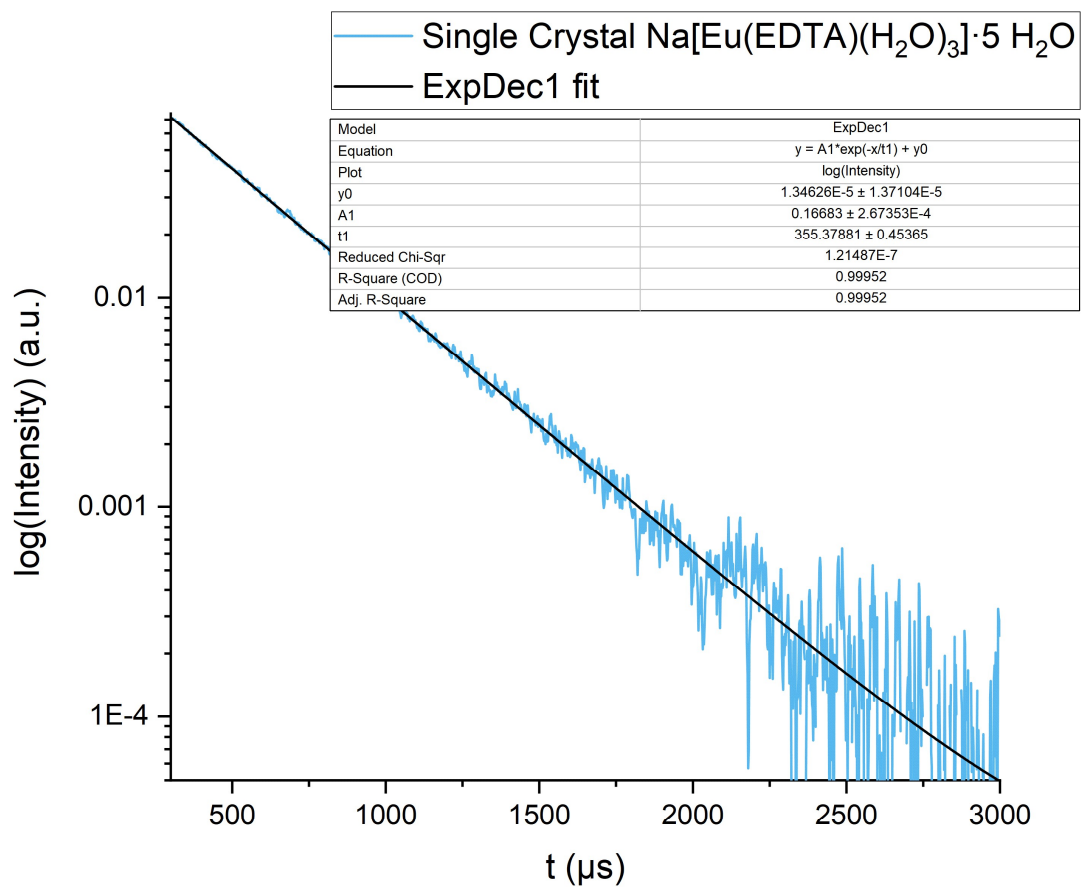

**Figure S 47:** Na[Eu(EDTA)(H<sub>2</sub>O)<sub>3</sub>] $\cdot$ 5H<sub>2</sub>O single crystal luminescence lifetime at 293 K. Fitted using OriginPro's ExpDec1 function.

### 4.3 Spectroscopy Data for Sm<sup>3+</sup> Compounds

#### 4.3.1 Luminescence Lifetimes for Sm<sup>3+</sup> Compounds

**Table S 16:** Luminescence lifetimes of the Sm<sup>3+</sup> complexes for crystals ground to a powder in 2-methyl tetrahydrofuran at 77 K.

| Complex                                                        | $\tau_{obs}$ ( $\mu$ s) |
|----------------------------------------------------------------|-------------------------|
| Na <sub>3</sub> [Sm(ODA) <sub>3</sub> ]·7H <sub>2</sub> O      | 35.14                   |
| Cs <sub>3</sub> [Sm(DPA) <sub>3</sub> ]·9H <sub>2</sub> O      | 42.24                   |
| Na[Sm(DOTA)(H <sub>2</sub> O)]·4H <sub>2</sub> O               | 10.88                   |
| Na[Sm(EDTA)(H <sub>2</sub> O) <sub>3</sub> ]·5H <sub>2</sub> O | 7.63                    |

## 4.3.2 $\text{Na}_3[\text{Sm}(\text{ODA})_3] \cdot 7\text{H}_2\text{O}$ Spectra

### 4.3.2.1 $\text{Na}_3[\text{Sm}(\text{ODA})_3] \cdot 7\text{H}_2\text{O}$ Emission Spectra

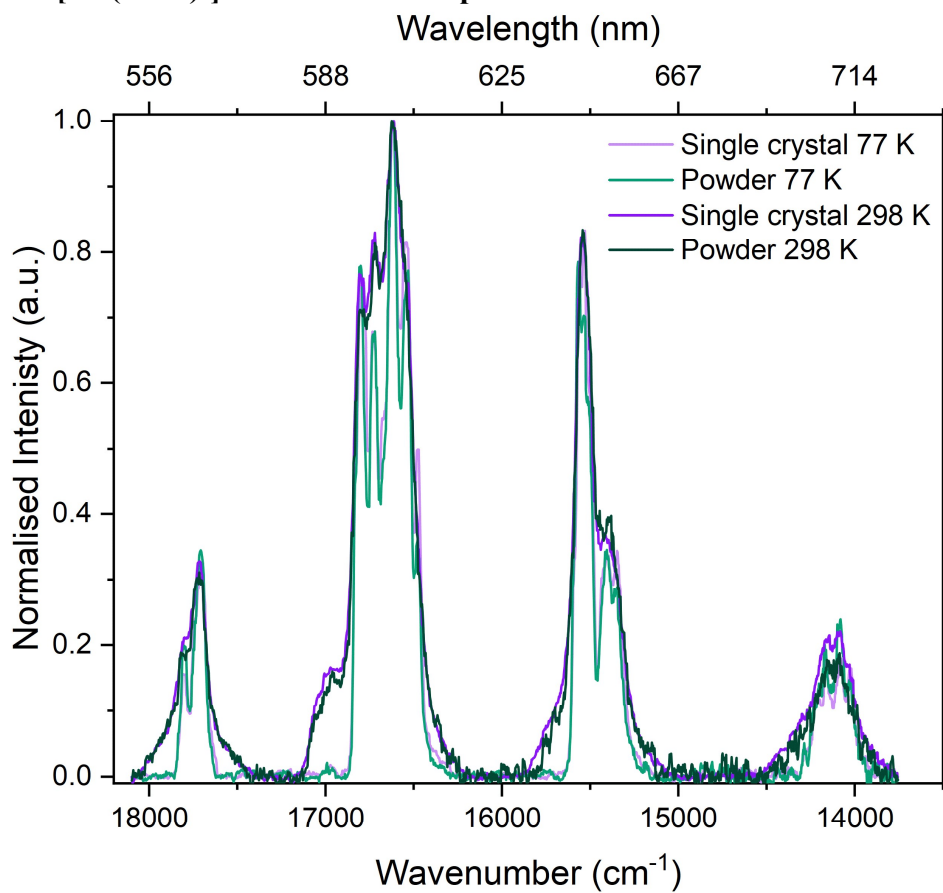

**Figure S 48:** Normalised emission (excitation at 463 nm) for single crystal and powder  $\text{Na}_3[\text{Sm}(\text{ODA})_3] \cdot 7\text{H}_2\text{O}$ , at 77 K and 298 K.

### 4.3.2.2 Na<sub>3</sub>[Sm(ODA)<sub>3</sub>]·7H<sub>2</sub>O Luminescence Lifetime

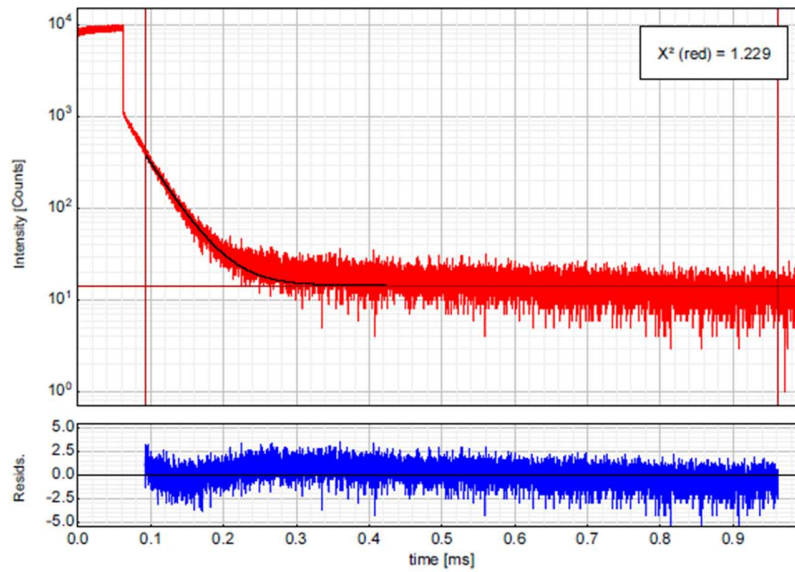

$$I(t) = \sum_{i=1}^n A_i e^{-\frac{t}{\tau_i}}$$

| Parameter             | Value   | Conf. Lower | Conf. Upper | Conf. Estimation |
|-----------------------|---------|-------------|-------------|------------------|
| A <sub>1</sub> [Cnts] | 377.0   | -18.2       | +18.2       | Fitting          |
| τ <sub>1</sub> [ms]   | 0.03514 | -0.00150    | +0.00150    | Fitting          |
| Bkgr. Dec [Cnts]      | 14.420  | -0.760      | +0.760      | Fitting          |

Average Lifetime:

τ<sub>Av.1</sub> = 0.03514 ms (intensity weighted)

τ<sub>Av.2</sub> = 0.03514 ms (amplitude weighted)

**Figure S 49:** Na<sub>3</sub>[Sm(ODA)<sub>3</sub>]·7H<sub>2</sub>O luminescence lifetime in 2-methyltetrahydrofuran at 77 K. Fitted using the PicoQuant FluoFit software.

### 4.3.3 Cs<sub>3</sub>[Sm(DPA)<sub>3</sub>]·9H<sub>2</sub>O Spectra

#### 4.3.3.1 Cs<sub>3</sub>[Sm(DPA)<sub>3</sub>]·9H<sub>2</sub>O Emission Spectrum

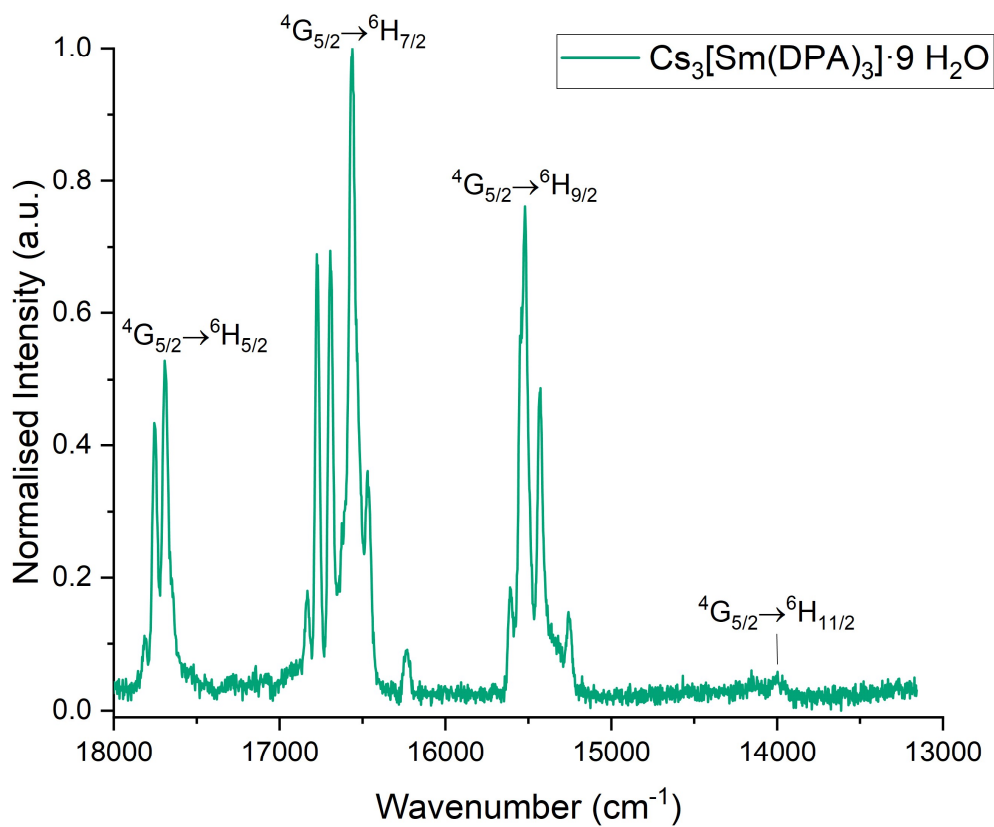

**Figure S 50:** Normalised emission spectrum (excitation at 401 nm) for Cs<sub>3</sub>[Sm(DPA)<sub>3</sub>]·9H<sub>2</sub>O in 2-methyltetrahydrofuran at 77 K.

### 4.3.3.2 Cs<sub>3</sub>[Sm(DPA)<sub>3</sub>]·9H<sub>2</sub>O Excitation Spectrum

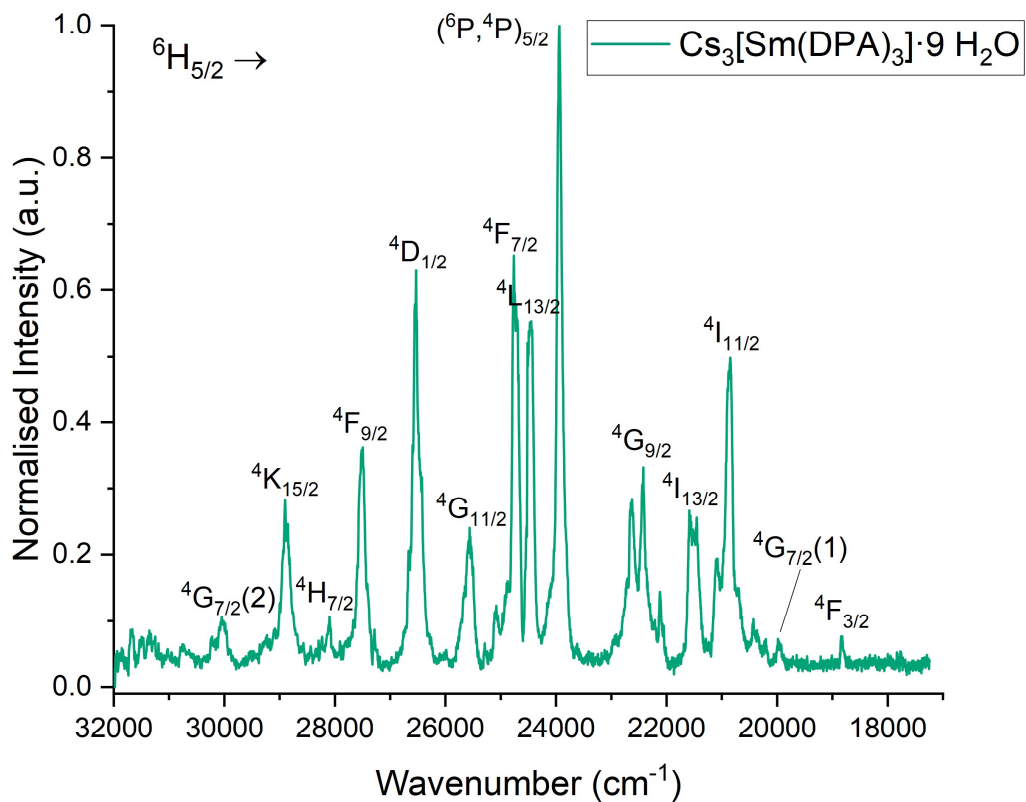

**Figure S 51:** Normalised excitation spectra (emission at 598 nm) for Cs<sub>3</sub>[Sm(DPA)<sub>3</sub>]·9H<sub>2</sub>O in 2-methyltetrahydrofuran at 77 K.

### 4.3.3.3 Cs<sub>3</sub>[Sm(DPA)<sub>3</sub>]·9H<sub>2</sub>O Luminescence Lifetime

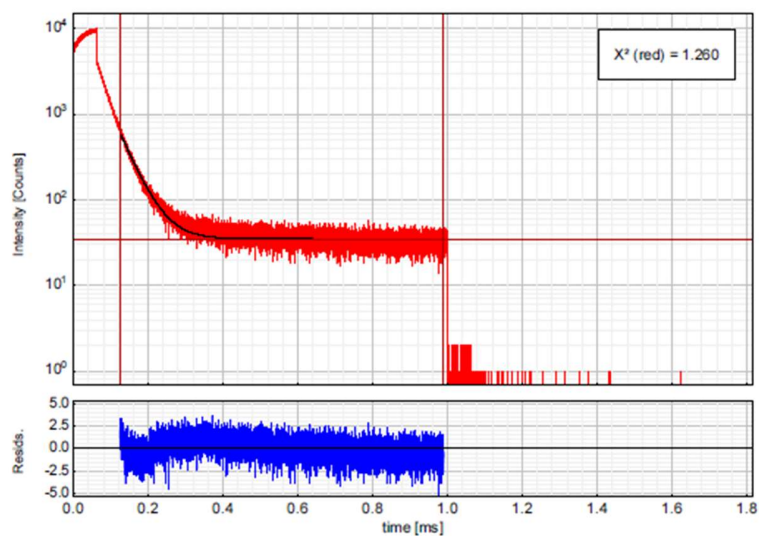

$$I(t) = \sum_{i=1}^n A_i e^{-\frac{t}{\tau_i}}$$

| Parameter             | Value   | Conf. Lower | Conf. Upper | Conf. Estimation |
|-----------------------|---------|-------------|-------------|------------------|
| A <sub>1</sub> [Cnts] | 581.4   | -21.4       | +21.4       | Fitting          |
| τ <sub>1</sub> [ms]   | 0.04224 | -0.00143    | +0.00143    | Fitting          |
| Bkgr. Dec. [Cnts]     | 35.11   | -1.16       | +1.16       | Fitting          |

Average Lifetime:

$$\tau_{Av,1} = 0.04224 \text{ ms (intensity weighted)}$$

$$\tau_{Av,2} = 0.04224 \text{ ms (amplitude weighted)}$$

**Figure S 52:** Cs<sub>3</sub>[Sm(DPA)<sub>3</sub>]·9H<sub>2</sub>O luminescence lifetime in 2-methyltetrahydrofuran at 77 K. Fitted using the PicoQuant FluorFit software.

### 4.3.4 Na[Sm(DOTA)H<sub>2</sub>O]·4H<sub>2</sub>O Spectra

#### 4.3.4.1 Na[Sm(DOTA)H<sub>2</sub>O]·4H<sub>2</sub>O Emission Spectrum

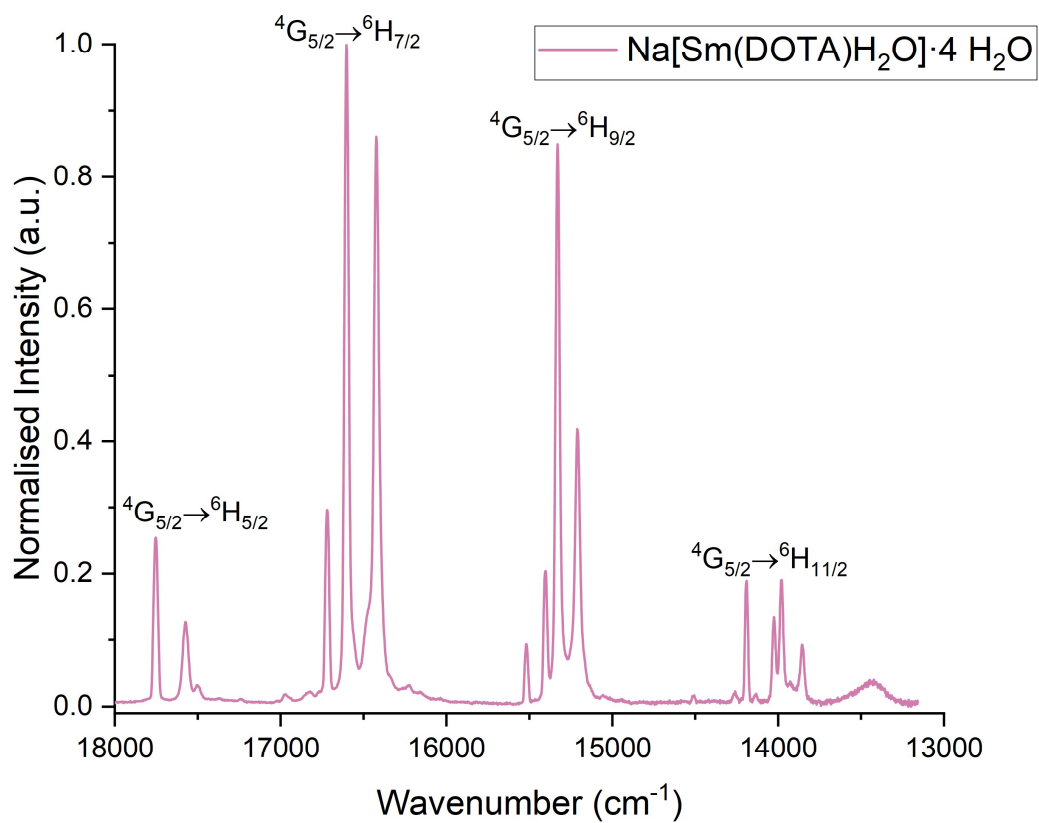

**Figure S 53:** Normalised emission spectrum (excitation at 401 nm) for Na[Sm(DOTA)H<sub>2</sub>O]·4H<sub>2</sub>O in 2-methyltetrahydrofuran at 77 K.



#### 4.3.4.2 Na[Sm(DOTA)H<sub>2</sub>O]·4H<sub>2</sub>O Excitation Spectrum

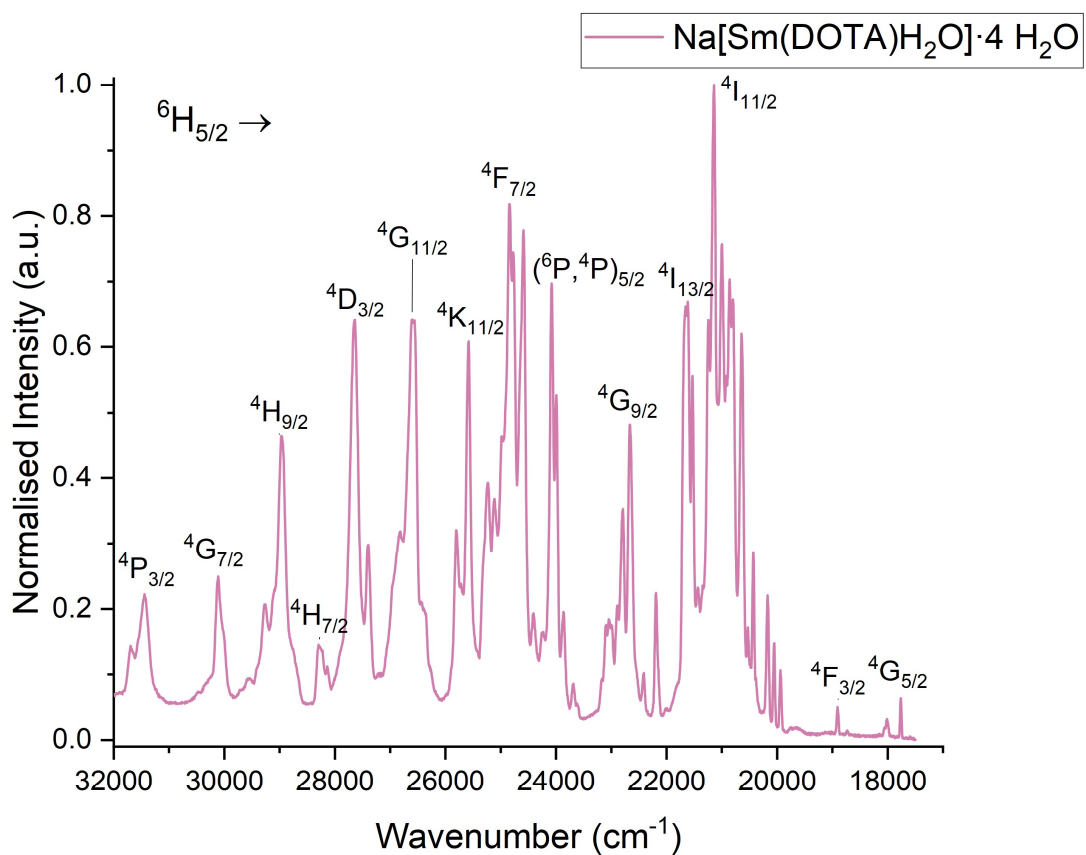

**Figure S 54:** Normalised excitation spectra (emission at 598 nm) for Na[Sm(DOTA)H<sub>2</sub>O]·4H<sub>2</sub>O in 2-methyltetrahydrofuran at 77 K.

#### 4.3.4.3 Na[Sm(DOTA)H<sub>2</sub>O]·4H<sub>2</sub>O Luminescence Lifetime

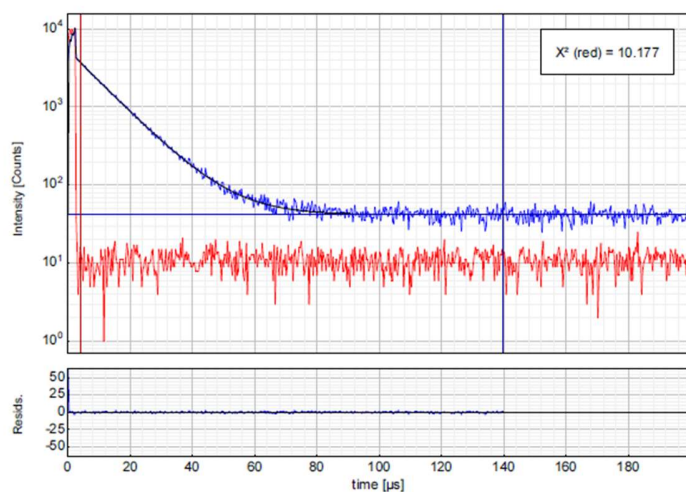

$$I(t) = \int_{-\infty}^t IRF(t') \sum_{i=1}^n A_i e^{-\frac{t-t'}{\tau_i}} dt'$$

| Parameter               | Value   | Conf. Lower | Conf. Upper | Conf. Estimation |
|-------------------------|---------|-------------|-------------|------------------|
| A <sub>1</sub> [Cnts]   | 5636    | -157        | +157        | Fitting          |
| τ <sub>1</sub> [μs]     | 10.876  | -0.228      | +0.228      | Fitting          |
| Bkgr. Dec [Cnts]        | 41.78   | -4.18       | +4.18       | Fitting          |
| Bkgr. IRF [Cnts]        | -102    | -114        | +114        | Fitting          |
| Shift IRF [μs]          | 0.00183 | -0.0302     | +0.0302     | Fitting          |
| A <sub>Sat</sub> [Cnts] | 46040   | -2940       | +2940       | Fitting          |

Average Lifetime:

$$\tau_{Av,1} = 10.876 \mu\text{s (intensity weighted)}$$

$$\tau_{Av,2} = 10.876 \mu\text{s (amplitude weighted)}$$

**Figure S 55:** Na[Sm(DOTA)H<sub>2</sub>O]·4H<sub>2</sub>O luminescence lifetime in 2-methyltetrahydrofuran at 77 K. Fitted using the PicoQuant FluoFit software.

### 4.3.5 Na[Sm(EDTA)(H<sub>2</sub>O)<sub>3</sub>]·5H<sub>2</sub>O Spectra

#### 4.3.5.1 Na[Sm(EDTA)(H<sub>2</sub>O)<sub>3</sub>]·5H<sub>2</sub>O Emission Spectrum

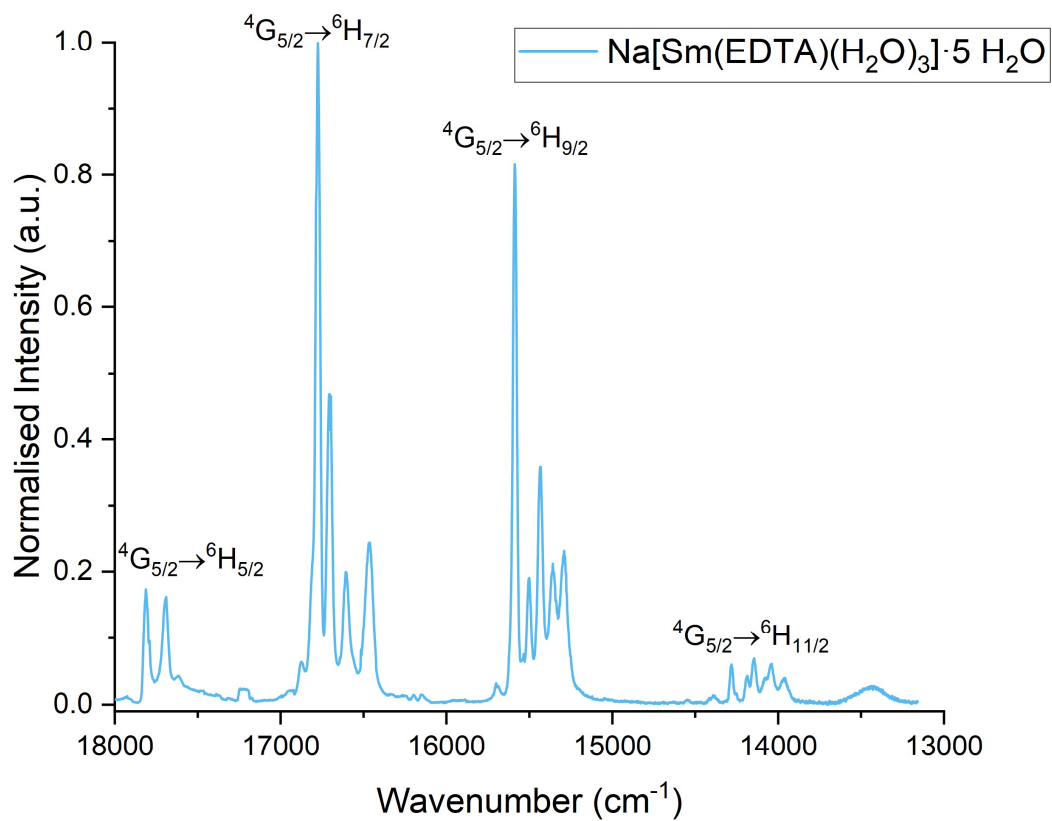

**Figure S 56:** Normalised emission spectrum (excitation at 401 nm) for Na[Sm(EDTA)(H<sub>2</sub>O)<sub>3</sub>]·5H<sub>2</sub>O in 2-methyltetrahydrofuran at 77 K.

#### 4.3.5.2 Na[Sm(EDTA)(H<sub>2</sub>O)<sub>3</sub>]·5H<sub>2</sub>O Excitation Spectrum

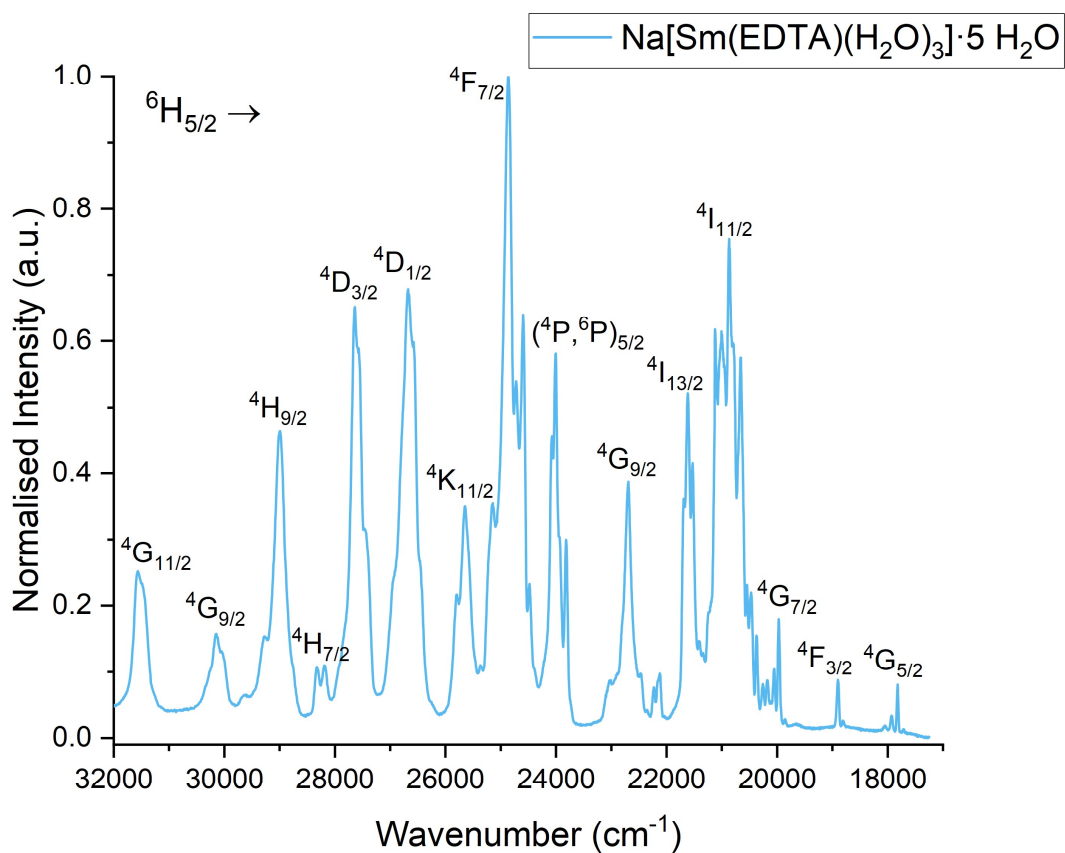

**Figure S 57:** Normalised excitation spectra (emission at 598 nm) for Na[Sm(EDTA)(H<sub>2</sub>O)<sub>3</sub>]·5H<sub>2</sub>O in 2-methyltetrahydrofuran at 77 K.

### 4.3.5.3 Na[Sm(EDTA)(H<sub>2</sub>O)<sub>3</sub>]·5H<sub>2</sub>O Luminescence Lifetime

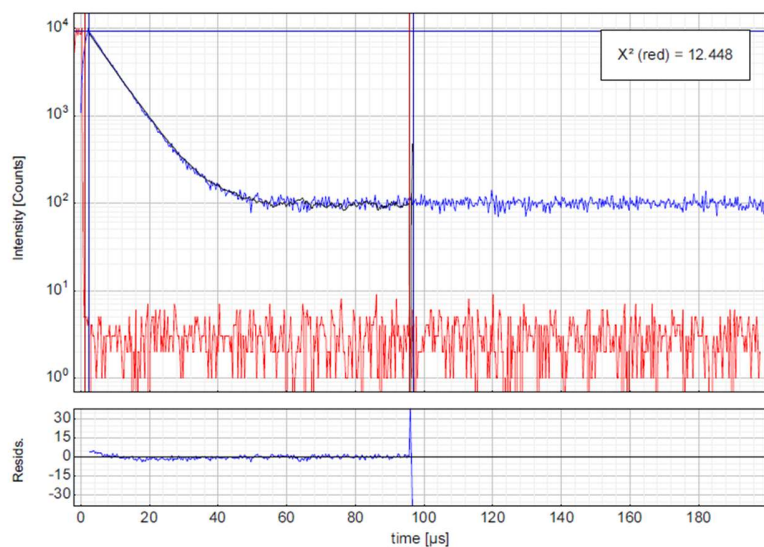

$$I(t) = \int_{-\infty}^t IRF(t') \sum_{i=1}^n A_i e^{-\frac{t-t'}{\tau_i}} dt'$$

| Parameter                | Value     | Conf. Lower | Conf. Upper | Conf. Estimation |
|--------------------------|-----------|-------------|-------------|------------------|
| A <sub>1</sub> [Cnts]    | -107035.5 | -73.8       | +73.8       | Fitting          |
| τ <sub>1</sub> [μs]      | 7.62527   | -0.00521    | +0.00521    | Fitting          |
| Bkgr. Dec. [Cnts]        | 9294.89   | -6.84       | +6.84       | Fitting          |
| Bkgr. IRF [Cnts]         | -280.064  | -0.211      | +0.211      | Fitting          |
| Shift IRF [μs]           | -1.861    | -0.420      | +0.420      | Fitting          |
| A <sub>Scat</sub> [Cnts] | 199640    | -1720       | +1720       | Fitting          |

Average Lifetime:

$$\tau_{Av,1} = 7.62527 \mu\text{s (intensity weighted)}$$

$$\tau_{Av,2} = 7.62527 \mu\text{s (amplitude weighted)}$$

**Figure S 58:** Na[Sm(EDTA)(H<sub>2</sub>O)<sub>3</sub>]·5H<sub>2</sub>O luminescence lifetime in 2-methyltetrahydrofuran at 77 K. Fitted using the PicoQuant FluoFit software.

## 5 Deconvolution of the Electronic Energies using Voigt fitting and Boltzmann Population Analysis

### 5.1 Fits for Na[Sm(DOTA)H<sub>2</sub>O]·4H<sub>2</sub>O

In the case of Na[Sm(DOTA)(H<sub>2</sub>O)]·4H<sub>2</sub>O three peaks were observed in both the emission and excitation spectra at 77 K. One of the peaks is observed in both emission and excitation. From this we unambiguously resolve the energy levels in both <sup>6</sup>H<sub>5/2</sub> and <sup>4</sup>G<sub>5/2</sub> as is seen in Figure S58. The spectra are fitted in Figure S59 and S60 and the fit values provided in Table S17 and SX18.

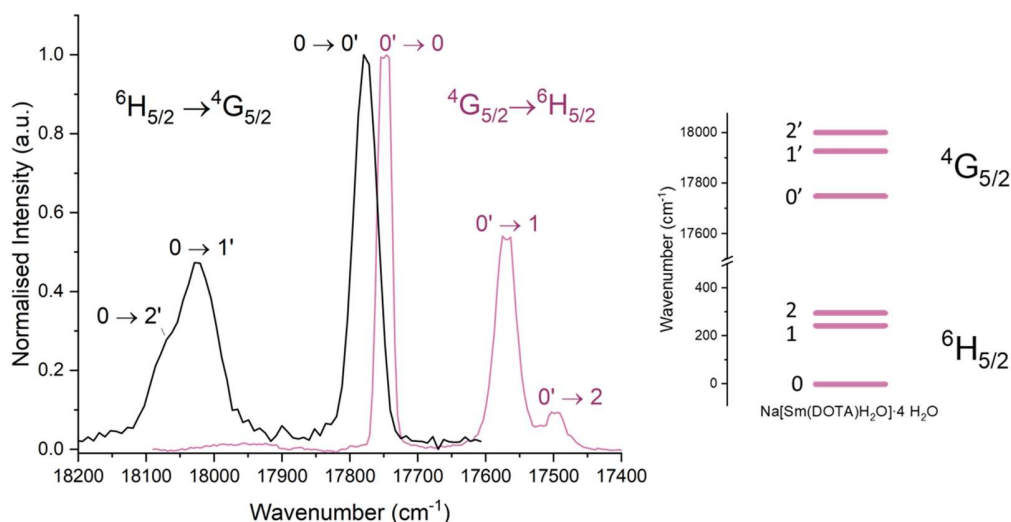

**Figure S59:** Results for Na[Sm(DOTA)H<sub>2</sub>O]·4H<sub>2</sub>O. Left: Normalised powdered emission (excitation at 463 nm) recorded at 77 K normalised to the <sup>4</sup>G<sub>5/2</sub> → <sup>6</sup>H<sub>5/2</sub> band. Normalised powdered excitation (emission scan from 520 nm to 580 nm) recorded at 77 K normalised to the <sup>4</sup>G<sub>5/2</sub> ← <sup>6</sup>H<sub>5/2</sub> band. The spectra were normalised to the transition from the lowest *m<sub>J</sub>* state in the ground state multiplet (<sup>6</sup>H<sub>5/2</sub>) to the lowest *m<sub>J</sub>* state in the first emitting state multiplet (<sup>4</sup>G<sub>5/2</sub>). The black and pink labels indicate the assumed transitions from the electronic energy levels. Right: Resolved energy levels in <sup>6</sup>H<sub>5/2</sub> and <sup>4</sup>G<sub>5/2</sub>.

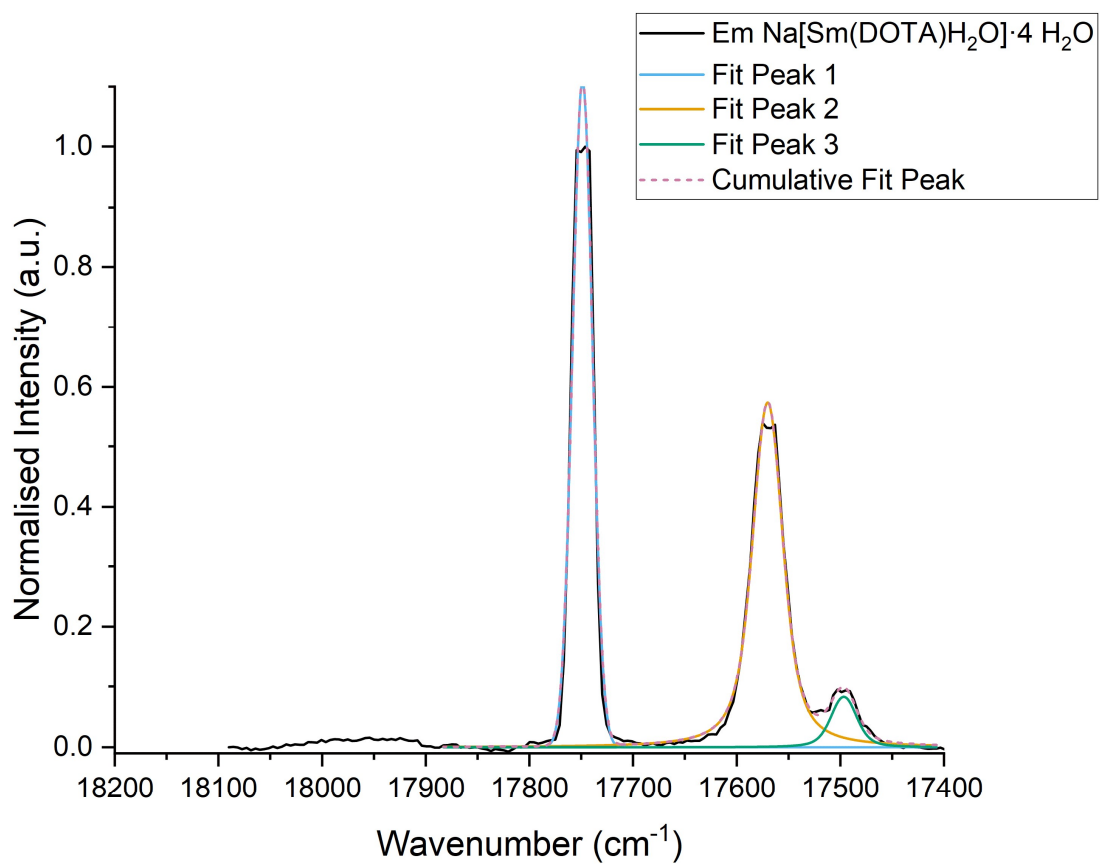

**Figure S 60:** Voigt fitting of the  ${}^4G_{5/2} \rightarrow {}^6H_{5/2}$  band in the  $\text{Na}[\text{Sm}(\text{DOTA})\text{H}_2\text{O}] \cdot 4\text{H}_2\text{O}$  emission spectra at 77 K.

|                             |      | Value       | Standard Error | t-Value      | Prob> t     | Dependency |
|-----------------------------|------|-------------|----------------|--------------|-------------|------------|
| Peak1(Normalised Intensity) | y0   | 0           | 0              | --           | --          | 0          |
|                             | xc   | 17748.75666 | 0.15021        | 118160.80277 | 0           | 0.00322    |
|                             | A    | 26.6606     | 0.36211        | 73.6247      | 3.90728E-94 | 0.33884    |
|                             | wG*  | 22.5977     | 0.35479        | 63.69243     | 1.72542E-87 | 0.38306    |
|                             | wL   | 5.32291E-16 | 0.07638        | 6.969E-15    | 1           | 2.02607E-4 |
|                             | FWHM | 22.5977     | 0.35479        |              |             |            |
| Peak2(Normalised Intensity) | y0   | 0           | 0              | --           | --          | 0          |
|                             | xc   | 17570.08898 | 0.38728        | 45368.48286  | 0           | 0.02286    |
|                             | A    | 26.59476    | 0.75356        | 35.29225     | 4.04868E-61 | 0.64695    |
|                             | wG*  | 22.5977     | 0.35479        | 63.69243     | 1.72542E-87 | 0.38306    |
|                             | wL   | 19.46843    | 1.31199        | 14.83883     | 7.99864E-28 | 0.65818    |
|                             | FWHM | 34.75431    | 0.89838        |              |             |            |
| Peak3(Normalised Intensity) | y0   | 0           | 0              | --           | --          | 0          |
|                             | xc   | 17496.66776 | 2.39568        | 7303.42468   | 0           | 0.01704    |
|                             | A    | 3.04238     | 0.66583        | 4.56933      | 1.30636E-5  | 0.66425    |
|                             | wG*  | 22.5977     | 0.35479        | 63.69243     | 1.72542E-87 | 0.38306    |
|                             | wL   | 11.59985    | 8.01491        | 1.44728      | 0.15071     | 0.64768    |
|                             | FWHM | 29.43489    | 5.15851        |              |             |            |

Reduced Chi-sqr = 6.19485291645E-4

COD(R^2) = 0.98874932624925

Iterations Performed = 5

Total Iterations in Session = 25

**Table S 17:** Voigt fit parameters of the  ${}^4G_{5/2} \rightarrow {}^6H_{5/2}$  band in the Na[Sm(DOTA)H<sub>2</sub>O]·4H<sub>2</sub>O emission spectra at 77 K.



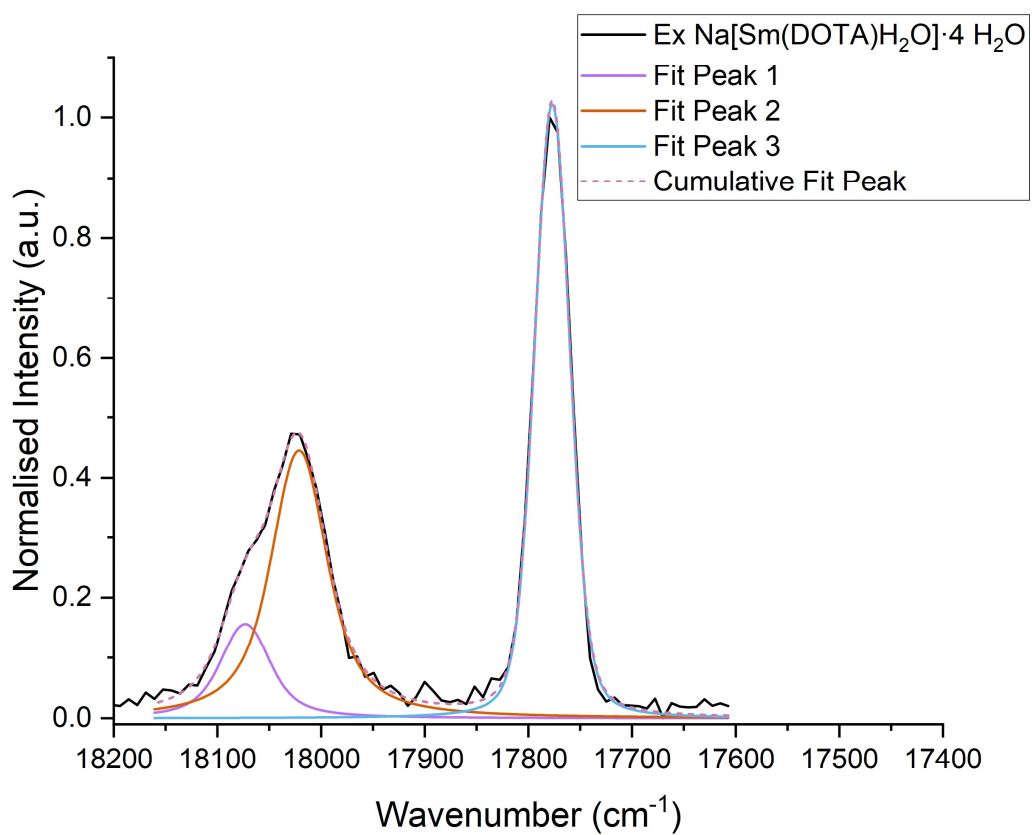

**Figure S 61:** Voigt fitting of the  ${}^4G_{5/2} \leftarrow {}^6H_{5/2}$  band in the  $\text{Na}[\text{Sm}(\text{DOTA})\text{H}_2\text{O}] \cdot 4\text{H}_2\text{O}$  excitation spectra at 77 K.

|                             |      | Value       | Standard Error | t-Value      | Prob> t      | Dependency |
|-----------------------------|------|-------------|----------------|--------------|--------------|------------|
| Peak1(Normalised Intensity) | y0   | 0           | 0              | --           | --           | 0          |
|                             | xc   | 18073.18816 | 3.66763        | 4927.75277   | 4.89487E-170 | 0.83707    |
|                             | A    | 12.03993    | 3.14974        | 3.82252      | 3.16424E-4   | 0.97733    |
|                             | wG*  | 34.60451    | 1.21327        | 28.52158     | 1.35806E-36  | 0.90207    |
|                             | wL   | 34.67883    | 10.20331       | 3.39878      | 0.00121      | 0.91602    |
|                             | FWHM | 56.72255    | 7.35749        |              |              |            |
| Peak2(Normalised Intensity) | y0   | 0           | 0              | --           | --           | 0          |
|                             | xc   | 18021.247   | 1.53554        | 11736.1328   | 1.02155E-192 | 0.86962    |
|                             | A    | 40.26348    | 3.24597        | 12.40414     | 3.31395E-18  | 0.97442    |
|                             | wG*  | 34.60451    | 1.21327        | 28.52158     | 1.35806E-36  | 0.90207    |
|                             | wL   | 44.79979    | 3.38593        | 13.23115     | 1.9128E-19   | 0.89114    |
|                             | FWHM | 64.35038    | 2.72712        |              |              |            |
| Peak3(Normalised Intensity) | y0   | 0           | 0              | --           | --           | 0          |
|                             | xc   | 17776.97088 | 0.17693        | 100476.07014 | 6.2181E-249  | 0.00116    |
|                             | A    | 48.21849    | 0.71166        | 67.75513     | 2.14885E-58  | 0.76874    |
|                             | wG*  | 34.60451    | 1.21327        | 28.52158     | 1.35806E-36  | 0.90207    |
|                             | wL   | 9.8168      | 1.49435        | 6.56927      | 1.3515E-8    | 0.94361    |
|                             | FWHM | 40.15287    | 0.50983        |              |              |            |

Reduced Chi-sqr = 2.02168298544E-4  
COD(R^2) = 0.99673235705564  
Iterations Performed = 4  
Total Iterations in Session = 34

**Table S 18:** Voigt fit parameters of the  $^4G_{5/2} \leftarrow ^6H_{5/2}$  band in the Na[Sm(DOTA)H<sub>2</sub>O]·4H<sub>2</sub>O excitation spectra at 77 K.

### 5.1.1 Boltzmann Population Calculations for Na[Sm(EDTA)(H<sub>2</sub>O)<sub>3</sub>]·5H<sub>2</sub>O

For Na[Sm(EDTA)(H<sub>2</sub>O)<sub>3</sub>]·5H<sub>2</sub>O four peaks were observed in both the emission and excitation spectra at 77 K. Similar as was found for the Na[Sm(DOTA)H<sub>2</sub>O]·4H<sub>2</sub>O sample, the three energy levels in levels in both <sup>6</sup>H<sub>5/2</sub> and <sup>4</sup>G<sub>5/2</sub> are unambiguously resolved as is seen in Figure S61. Different to the DOTA complex, the crystal field splitting is found to be slightly lower and thermally populated transitions are observed from 1 and 1'. Only 1' → 0 and 1 → 0 can be seen as the other three lines convoluted with the primary transitions from 0 and 0'. The spectra are fitted in Figure S62 and S63 and the fit values provided in Table S19 and Table S20.

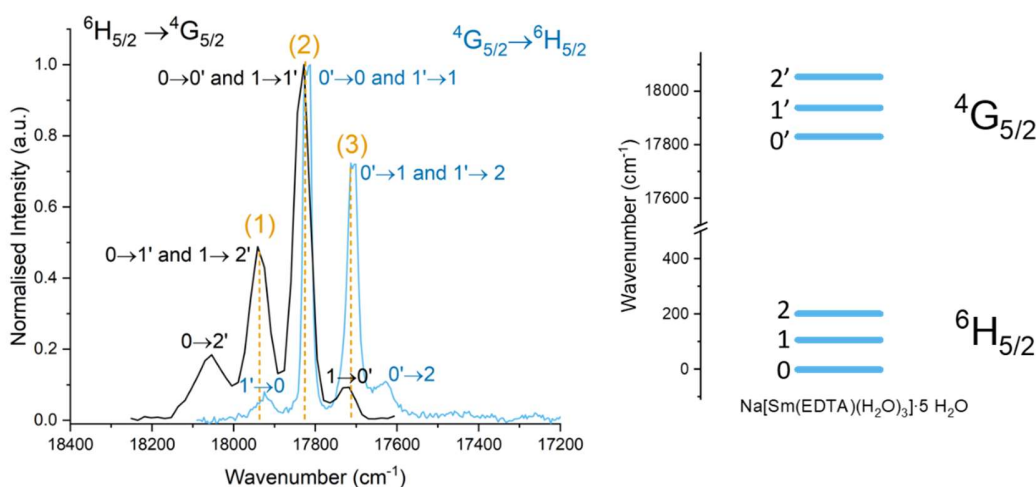

**Figure S 62:** Results for for Na[Sm(EDTA)(H<sub>2</sub>O)<sub>3</sub>]·5H<sub>2</sub>O. Left: Normalised powdered emission (excitation at 463 nm) recorded at 77 K normalised to the <sup>4</sup>G<sub>5/2</sub> → <sup>6</sup>H<sub>5/2</sub> band. Normalised powdered excitation (emission scan from 520 nm to 580 nm) recorded at 77 K normalised to the <sup>4</sup>G<sub>5/2</sub> ← <sup>6</sup>H<sub>5/2</sub> band. The spectra were normalised to the transition from the lowest *m<sub>J</sub>* state in the ground state multiplet (<sup>6</sup>H<sub>5/2</sub>) to the lowest *m<sub>J</sub>* state in the first emitting state multiplet (<sup>4</sup>G<sub>5/2</sub>). Orange labels indicate the numbering of the shared peaks. Right: Resolved energy levels in <sup>6</sup>H<sub>5/2</sub> and <sup>4</sup>G<sub>5/2</sub>.

## 5.2 Boltzmann Population Analysis for

### $\text{Na}[\text{Sm}(\text{EDTA})(\text{H}_2\text{O})_3] \cdot 5\text{H}_2\text{O}$

#### 5.2.1 Voigt Fitting for $\text{Na}[\text{Sm}(\text{EDTA})(\text{H}_2\text{O})_3] \cdot 5\text{H}_2\text{O}$

The spectra are fitted such that the spacing between the shared peaks are the same for emission and excitation, but only shifted by a Stokes shift, which in this case was found to be  $12.6 \text{ cm}^{-1}$ . The excitation spectrum was fitted first, and the emission spectrum fitted afterwards with the peak position fixed. The spectra were fitted with Voigt functions with shared Gaussian width but separate Lorentzian widths for each peak.

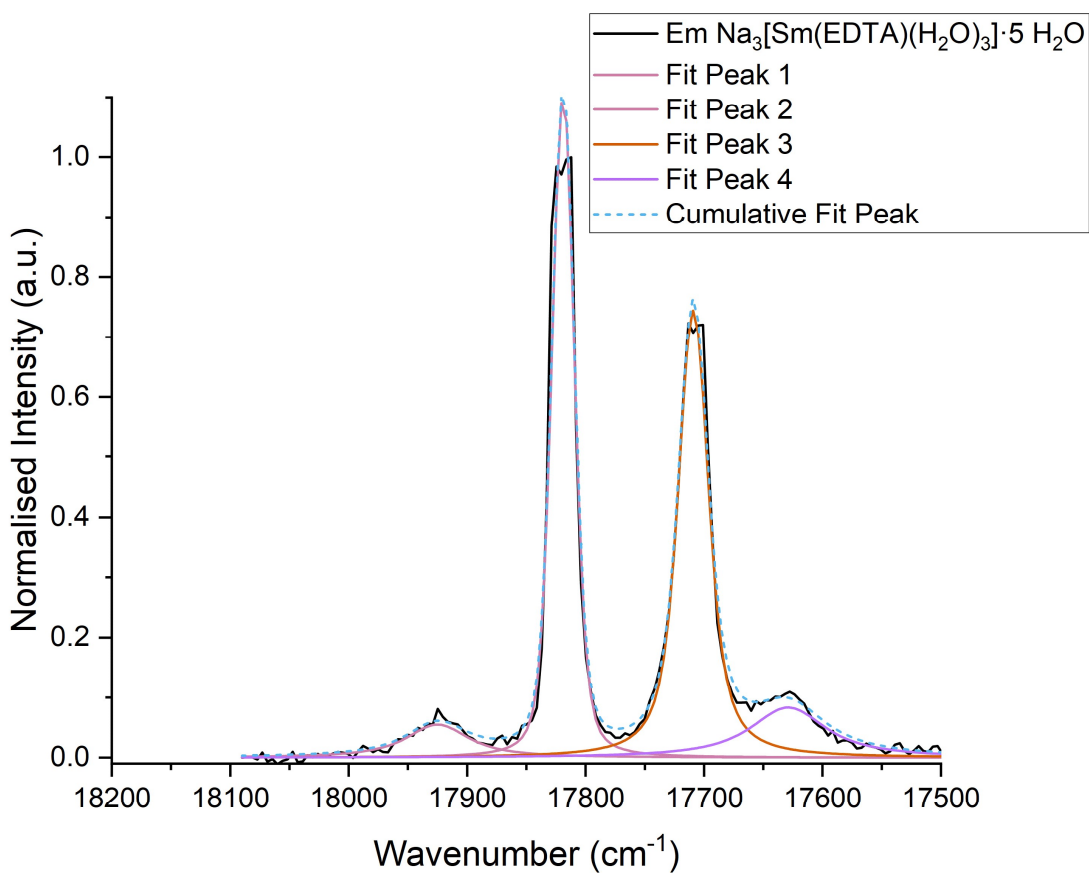

**Figure S 63:** Voigt fitting of the  ${}^4G_{5/2} \rightarrow {}^6H_{5/2}$  band in the  $\text{Na}[\text{Sm}(\text{EDTA})(\text{H}_2\text{O})_3] \cdot 5\text{H}_2\text{O}$  emission spectra at 77 K.

|                             |      | Value       | Standard Error | t-Value  | Prob> t | Dependency |
|-----------------------------|------|-------------|----------------|----------|---------|------------|
| Peak1(Normalised Intensity) | y0   | 0           | 0              | --       | --      | 0          |
|                             | xc   | 17925       | 0              | --       | --      | 0          |
|                             | A    | 5.28904     | 36.3944        | 0.14533  | 0.88448 | 0.62034    |
|                             | wG*  | 18.58295    | 34.24125       | 0.54271  | 0.58742 | 0.90558    |
|                             | wL   | 57.58969    | 592.17534      | 0.09725  | 0.92254 | 0.59734    |
|                             | FWHM | 63.4018     | 547.65505      |          |         |            |
| Peak2(Normalised Intensity) | y0   | 0           | 0              | --       | --      | 0          |
|                             | xc   | 17819       | 0              | --       | --      | 0          |
|                             | A    | 30.10155    | 23.31782       | 1.29092  | 0.19695 | 0.78901    |
|                             | wG*  | 18.58295    | 34.24125       | 0.54271  | 0.58742 | 0.90558    |
|                             | wL   | 6.98775     | 41.68065       | 0.16765  | 0.86688 | 0.94122    |
|                             | FWHM | 22.60102    | 14.54687       |          |         |            |
| Peak3(Normalised Intensity) | y0   | 0           | 0              | --       | --      | 0          |
|                             | xc   | 17709       | 0              | --       | --      | 0          |
|                             | A    | 31.03679    | 31.80021       | 0.97599  | 0.32925 | 0.80944    |
|                             | wG*  | 18.58295    | 34.24125       | 0.54271  | 0.58742 | 0.90558    |
|                             | wL   | 18.83968    | 45.17743       | 0.41702  | 0.67673 | 0.83898    |
|                             | FWHM | 30.61931    | 26.3484        |          |         |            |
| Peak4(Normalised Intensity) | y0   | 0           | 0              | --       | --      | 0          |
|                             | xc   | 17629.06173 | 151.42211      | 116.4233 | 0       | 0.21725    |
|                             | A    | 9.82237     | 49.31771       | 0.19917  | 0.84216 | 0.75336    |
|                             | wG*  | 18.58295    | 34.24125       | 0.54271  | 0.58742 | 0.90558    |
|                             | wL   | 71.96948    | 484.11748      | 0.14866  | 0.88184 | 0.69156    |
|                             | FWHM | 76.77931    | 458.29441      |          |         |            |

Reduced Chi-sqr = 0.63908162107

COD(R^2) = -0.13332200411659

Iterations Performed = 1

Total Iterations in Session = 4

**Table S 19:** Voight fit parameters of the  ${}^4G_{5/2} \rightarrow {}^6H_{5/2}$  band in the  $\text{Na}[\text{Sm}(\text{EDTA})(\text{H}_2\text{O})_3] \cdot 5\text{H}_2\text{O}$  emission spectra at 77 K.

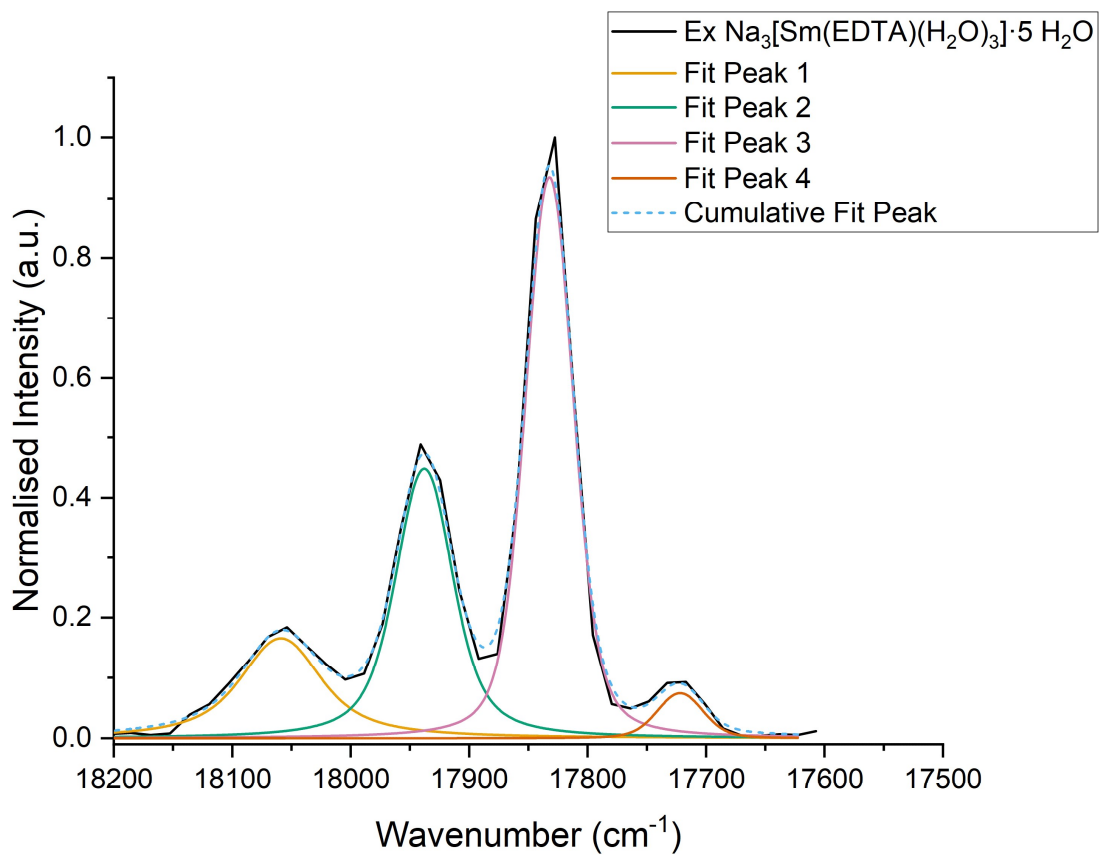

**Figure S 64:** Voigt fitting of the  $^4G_{5/2} \leftarrow ^6H_{5/2}$  band in the  $\text{Na}[\text{Sm}(\text{EDTA})(\text{H}_2\text{O})_3] \cdot 5\text{H}_2\text{O}$  excitation spectra at 77 K.

|                             |      | Value       | Standard Error | t-Value     | Prob> t      | Dependency |
|-----------------------------|------|-------------|----------------|-------------|--------------|------------|
| Peak1(Normalised Intensity) | y0   | 0           | 0              | --          | --           | 0          |
|                             | xc   | 18058.95619 | 4.51514        | 3999.64561  | 1.35355E-79  | 0.13301    |
|                             | A    | 19.29867    | 2.87632        | 6.70949     | 3.33958E-7   | 0.7363     |
|                             | wG*  | 39.15061    | 5.16585        | 7.57874     | 3.75247E-8   | 0.95289    |
|                             | wL   | 61.11802    | 15.30037       | 3.99454     | 4.49001E-4   | 0.69697    |
|                             | FWHM | 81.06646    | 12.49706       |             |              |            |
| Peak2(Normalised Intensity) | y0   | 0           | 0              | --          | --           | 0          |
|                             | xc   | 17937.89357 | 1.38214        | 12978.34559 | 1.67986E-93  | 0.18403    |
|                             | A    | 33.59118    | 2.59455        | 12.94681    | 4.28225E-13  | 0.808      |
|                             | wG*  | 39.15061    | 5.16585        | 7.57874     | 3.75247E-8   | 0.95289    |
|                             | wL   | 29.47274    | 6.50108        | 4.53352     | 1.06657E-4   | 0.84906    |
|                             | FWHM | 57.24007    | 4.19472        |             |              |            |
| Peak3(Normalised Intensity) | y0   | 0           | 0              | --          | --           | 0          |
|                             | xc   | 17832.20906 | 0.54785        | 32549.41276 | 2.15669E-104 | 0.05237    |
|                             | A    | 54.24611    | 2.85607        | 18.99328    | 3.75688E-17  | 0.88678    |
|                             | wG*  | 39.15061    | 5.16585        | 7.57874     | 3.75247E-8   | 0.95289    |
|                             | wL   | 15.2651     | 6.54289        | 2.33308     | 0.02734      | 0.97332    |
|                             | FWHM | 47.9507     | 1.76383        |             |              |            |
| Peak4(Normalised Intensity) | y0   | 0           | 0              | --          | --           | 0          |
|                             | xc   | 17721.88204 | 6.58753        | 2690.21792  | 6.42895E-75  | 0.06125    |
|                             | A    | 3.98461     | 1.78785        | 2.22872     | 0.03435      | 0.74671    |
|                             | wG*  | 39.15061    | 5.16585        | 7.57874     | 3.75247E-8   | 0.95289    |
|                             | wL   | 11.37161    | 22.34855       | 0.50883     | 0.615        | 0.66943    |
|                             | FWHM | 45.58596    | 15.22849       |             |              |            |

Reduced Chi-sqr = 6.1883115501E-4

COD(R^2) = 0.99173988409474

Iterations Performed = 1

Total Iterations in Session = 34

**Table S 20:** Voigt fit parameters of the  ${}^4G_{5/2} \leftarrow {}^6H_{5/2}$  band in the  $\text{Na}[\text{Sm}(\text{EDTA})(\text{H}_2\text{O})_3] \cdot 5\text{H}_2\text{O}$  excitation spectra at 77 K.

### 5.3 Boltzmann Population Analysis for $\text{Na}_3[\text{Sm}(\text{ODA})_3] \cdot 7\text{H}_2\text{O}$

For  $\text{Na}_3[\text{Sm}(\text{ODA})_3] \cdot 7\text{H}_2\text{O}$  the spectra recorded at 77 K are not as easily interpreted as for the  $\text{Na}[\text{Sm}(\text{EDTA})(\text{H}_2\text{O})_3] \cdot 5\text{H}_2\text{O}$  and  $\text{Na}[\text{Sm}(\text{DOTA})(\text{H}_2\text{O})] \cdot 4\text{H}_2\text{O}$  samples. The crystal field splitting is smaller and therefore a larger contribution of thermally populated states are found in the spectra. To arrive at the results seen in Figure S 64 we use a Boltzmann population approach.

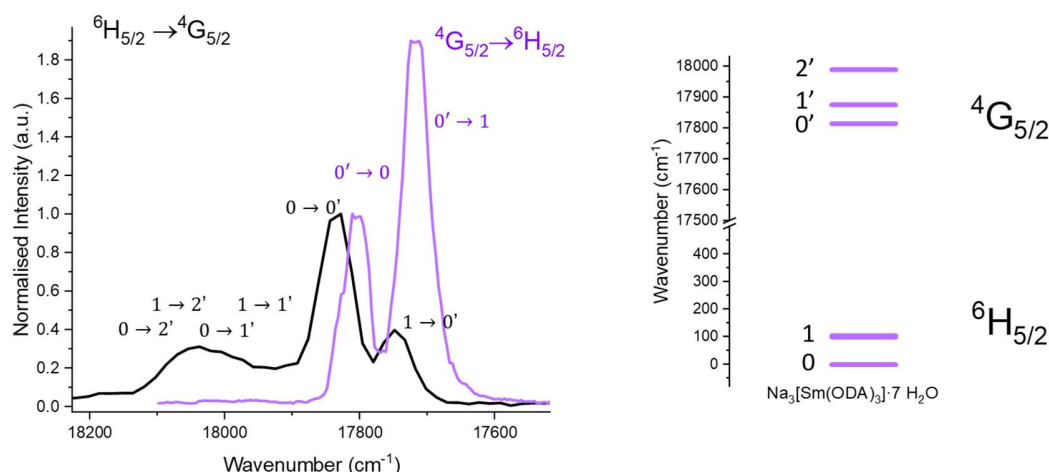

**Figure S 65:** Result for for  $\text{Na}_3[\text{Sm}(\text{ODA})_3] \cdot 7\text{H}_2\text{O}$ . Left: Normalised powdered emission (excitation at 463 nm) recorded at 77 K normalised to the  ${}^4\text{G}_{5/2} \rightarrow {}^6\text{H}_{5/2}$  band. Normalised powdered excitation (emission scan from 520 nm to 580 nm) recorded at 77 K normalised to the  ${}^4\text{G}_{5/2} \leftarrow {}^6\text{H}_{5/2}$  band. The spectra were normalised to the transition from the lowest  $m_J$  state in the ground state multiplet ( ${}^6\text{H}_{5/2}$ ) to the lowest  $m_J$  state in the first emitting state multiplet ( ${}^4\text{G}_{5/2}$ ). Right: Resolved energy levels in  ${}^6\text{H}_{5/2}$  and  ${}^4\text{G}_{5/2}$ .

In the thermal analysis it is exploited only two lines are observed in the emission spectra. These are fitted and the results are used as initial fit parameters for the excitation spectrum. In the emission spectra the splitting between the two observed states in  ${}^6\text{H}_{5/2}$  are found to be  $90 \text{ cm}^{-1}$  therefore the excitation spectrum is fitted with a set of double Voigt functions with a shared splitting parameter initialised at  $90 \text{ cm}^{-1}$ . The fit of the emission spectrum and the fit of the excitation spectrum is shown in Figure S65 and 66. Based on these results the thermal analysis is performed as shown in the main text.



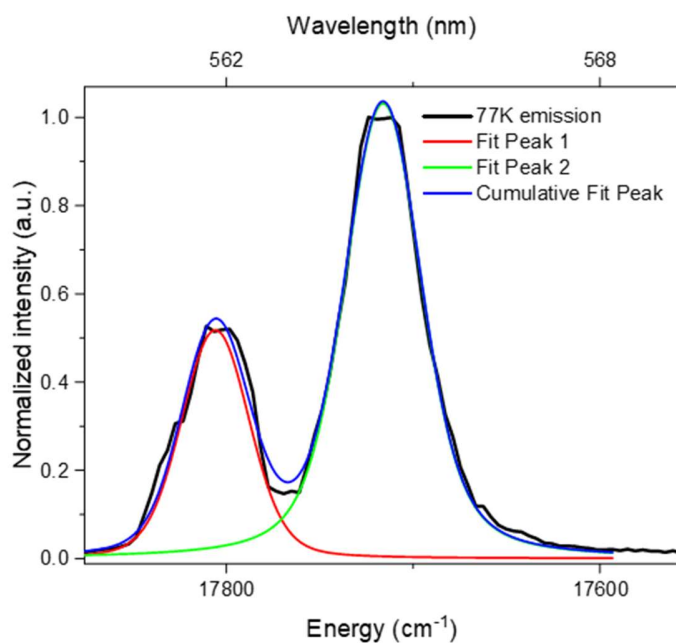

**Figure S 66:** Voigt fitting of the  ${}^4G_{5/2} \leftarrow {}^6H_{5/2}$  band in the  $\text{Na}_3[\text{Sm}(\text{ODA})_3] \cdot 7\text{H}_2\text{O}$  emission spectra at 77 K.

|                     |      | Value        | Standard Error | t-Value      | Prob> t       | Dependency |
|---------------------|------|--------------|----------------|--------------|---------------|------------|
| Peak1(77K emission) | y0   | 0            | 0              | --           | --            | 0          |
|                     | xc   | 17805.932716 | 0.468734       | 37987.286154 | 1.360048E-254 | 0.06774    |
|                     | A    | 25.692759    | 0.835914       | 30.736111    | 5.396064E-42  | 0.725065   |
|                     | wG*  | 38.087069    | 1.95439        | 19.487961    | 9.145427E-30  | 0.936522   |
|                     | wL   | 8.695158     | 2.619667       | 3.319184     | 0.001444      | 0.880229   |
|                     | FWHM | 42.949881    | 1.241136       |              |               |            |
|                     | ymax | 0.5178       | 0.010405       |              |               |            |
| Peak2(77K emission) | y0   | 0            | 0              | --           | --            | 0          |
|                     | xc   | 17716.139483 | 0.254799       | 69529.835501 | 8.681761E-273 | 0.053914   |
|                     | A    | 63.046158    | 1.136488       | 55.474535    | 5.636831E-59  | 0.806294   |
|                     | wG*  | 38.087069    | 1.95439        | 19.487961    | 9.145427E-30  | 0.936522   |
|                     | wL   | 18.886249    | 2.277336       | 8.293133     | 5.816601E-12  | 0.952409   |
|                     | FWHM | 49.184745    | 0.801029       |              |               |            |
|                     | ymax | 1.031413     | 0.010485       |              |               |            |

**Table S 21:** Voigt fit parameters of the  ${}^4G_{5/2} \rightarrow {}^6H_{5/2}$  band in the  $\text{Na}_3[\text{Sm}(\text{ODA})_3] \cdot 7\text{H}_2\text{O}$  emission spectra at 77 K.

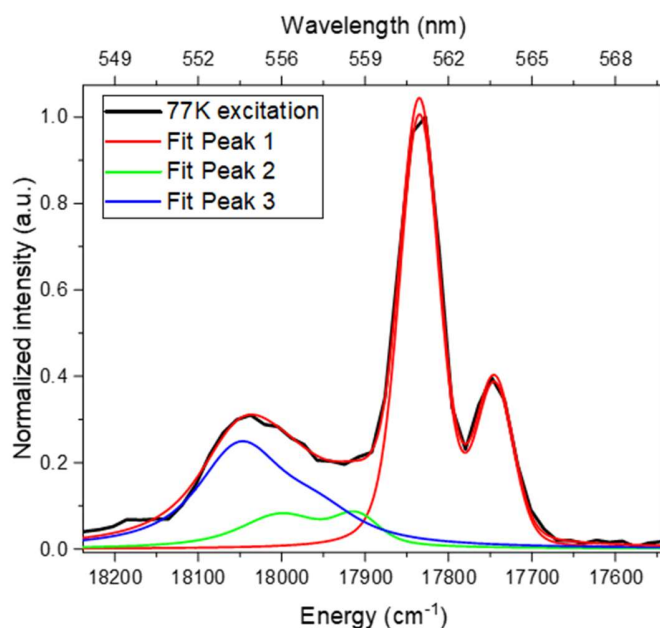

**Figure S 67:** Voigt fitting of the  ${}^4G_{5/2} \leftarrow {}^6H_{5/2}$  band in the  $\text{Na}_3[\text{Sm}(\text{ODA})_3] \cdot 7\text{H}_2\text{O}$  excitation spectra at 77 K with two sets of two Voigt functions fitted with a shared parameter.

|                       |        | Value        | Standard Error | t-Value    | Prob> t      | Dependency |
|-----------------------|--------|--------------|----------------|------------|--------------|------------|
| Peak1(77K excitation) | y0*    | 0            | 0              | --         | --           | 0          |
|                       | Delta* | -90.393957   | 29.7666        | -3.036758  | 0.004429     | 0.554872   |
|                       | wG*    | 47.957257    | 167.580491     | 0.286174   | 0.776385     | 0.991204   |
|                       | xc1    | 17834.766453 | 126.825333     | 140.624637 | 6.119653E-51 | 0.983455   |
|                       | A1     | 69.360019    | 244.416172     | 0.283778   | 0.778206     | 0.996205   |
|                       | wL1    | 16.990711    | 285.09868      | 0.059596   | 0.952807     | 0.996967   |
|                       | A2     | 21.312751    | 62.267396      | 0.342278   | 0.734132     | 0.954204   |
|                       | wL2*   | 7.891567     | 220.973561     | 0.035713   | 0.971709     | 0.967088   |
| Peak2(77K excitation) | y0     | 0            | 0              | --         | --           | 0          |
|                       | Delta* | -90.393957   | 29.7666        | -3.036758  | 0.004429     | 0.554872   |
|                       | wG*    | 47.957257    | 167.580491     | 0.286174   | 0.776385     | 0.991204   |
|                       | xc1    | 18000.403651 | 9733.864246    | 1.849256   | 0.072645     | 0.999701   |
|                       | A1     | 14.182178    | 12113.235881   | 0.001171   | 0.999072     | 0.999995   |
|                       | wL1    | 100          | 40883.112323   | 0.002446   | 0.998062     | 0.999943   |
|                       | A2     | 4.963538     | 1023.225032    | 0.004851   | 0.996156     | 0.999741   |
|                       | wL2*   | 25.325132    | 3067.92647     | 0.008255   | 0.993459     | 0.992476   |
| Peak3(77K excitation) | y0     | 0            | 0              | --         | --           | 0          |
|                       | Delta* | -90.393957   | 29.7666        | -3.036758  | 0.004429     | 0.554872   |
|                       | wG*    | 47.957257    | 167.580491     | 0.286174   | 0.776385     | 0.991204   |
|                       | xc1    | 18050        | 334.980323     | 53.883762  | 5.099572E-36 | 0.962398   |
|                       | wL1    | 100          | 5883.326629    | 0.016997   | 0.986533     | 0.999659   |

|  |      |           |              |          |          |          |
|--|------|-----------|--------------|----------|----------|----------|
|  | A2   | 12.296676 | 6554.984144  | 0.001876 | 0.998514 | 0.999984 |
|  | wL2* | 100       | 18448.288659 | 0.005421 | 0.995705 | 0.999629 |

**Table S 22:** Voight fit parameters of the  ${}^4G_{5/2} \leftarrow {}^6H_{5/2}$  band in the  $\text{Na}_3[\text{Sm}(\text{ODA})_3] \cdot 7\text{H}_2\text{O}$  excitation spectra at 77 K.

The calculations for the thermal analysis on the two levels in  ${}^6H_{5/2}$  are provided here:

***Relative transition probabilities***

$$A_{0' \rightarrow 0}^{rel} = \frac{I_{0' \rightarrow 0}^{rel}}{\sum I_{0' \rightarrow i}^{rel}} = \frac{38.08}{101.126}$$

$$A_{0' \rightarrow 1}^{rel} = \frac{I_{0' \rightarrow 1}^{rel}}{\sum I_{0' \rightarrow i}^{rel}} = \frac{63.05}{101.126}$$

$$B_{0 \rightarrow 0'}^{rel} = \frac{I_{0 \rightarrow 0'}^{rel}}{\sum I_{0 \rightarrow i'}^{rel}} = \frac{43.08}{113.6}$$

$$B_{0 \rightarrow 1'}^{rel} = \frac{I_{0 \rightarrow 1'}^{rel}}{\sum I_{0 \rightarrow i'}^{rel}} = \frac{63.05}{113.6}$$

***Relative thermal populations as observed from relative transition probabilities***

Using these values we calculated the observed thermal populations:

$$P_{i_{obs}}^{6H5/2} = \frac{I_{i \rightarrow j}^{rel}}{N \cdot B_{i \leftarrow j}^{rel}}, N = \sum_j \frac{I_{i \rightarrow j}^{rel}}{B_{i \leftarrow j}^{rel}}$$

$$P_{0_{obs}}^{6H5/2} = 0.730$$

$$P_{1_{obs}}^{6H5/2} = 0.269$$

***Relative thermal populations as calculated based on the Boltzmann distribution***

The two energy levels are separated by  $90 \text{ cm}^{-1}$ , using the Boltzmann distribution we find:

$$P_{i_{calc}}^{system} = \frac{e^{\frac{-E_i}{k_B T}}}{\sum_i^{system} e^{\frac{-E_i}{k_B T}}}$$

$$P_{0_{calc}}^{6H5/2} = 0.843$$

$$P_{1_{calc}}^{6H5/2} = 0.156$$

### Evaluating interpretations with the Loss function

Three interpretations can be done with the knowledge that 3 energy levels are present in  ${}^6\text{H}_{5/2}$ : Only two levels are observed, (0,1), the first level is degenerate, (0,0,1), the second level is degenerate, (0,1,1). These interpretations are evaluated using the loss function:

$$L = \sum_i 100 \cdot \frac{(P_{i_{obs}}^{6H5/2} - P_{i_{calc}}^{6H5/2})^2}{N}$$

The results are compiled in Figure S67. The Loss values found are unambiguously in favour of the (0,1,1) splitting.

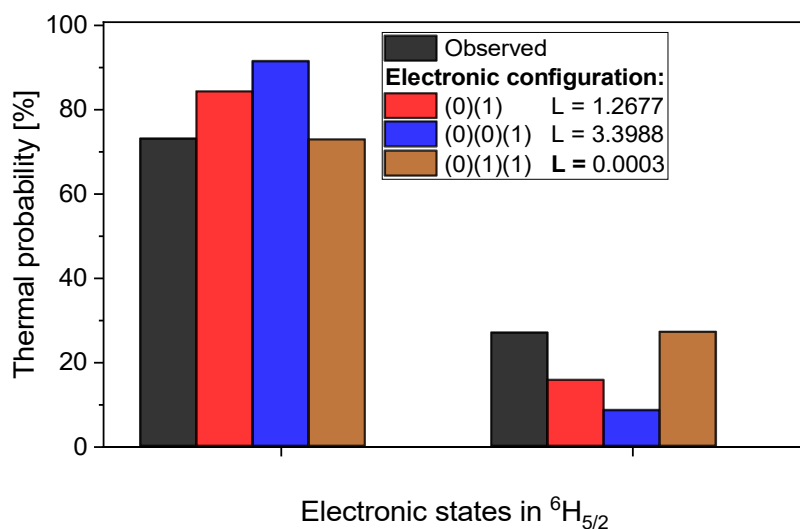

**Figure S 68:** Thermal populations of the electronic states in  ${}^6\text{H}_{5/2}$  for  $\text{Na}_3[\text{Sm}(\text{ODA})_3] \cdot 7\text{H}_2\text{O}$ .

## 5.4 Boltzmann Population Analysis for Cs<sub>3</sub>[Sm(DPA)<sub>3</sub>]·9H<sub>2</sub>O

For Cs<sub>3</sub>[Sm(DPA)<sub>3</sub>]·9H<sub>2</sub>O the spectra recorded at 77 K are following the same patterns as for the ODA complex and the spectra are analysed with the same approach. The final results obtained are shown in Figure S68.

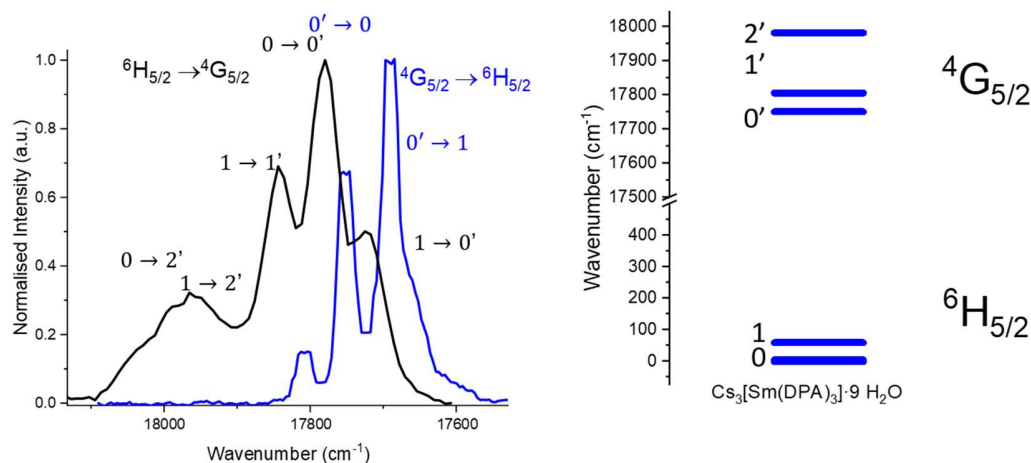

**Figure S 69:** Left: Normalised powdered emission (excitation at 463 nm) recorded at 77 K normalised to the  ${}^4G_{5/2} \rightarrow {}^6H_{5/2}$  band. Normalised powdered excitation (emission scan from 520 nm to 580 nm) recorded at 77 K normalised to the  ${}^4G_{5/2} \leftarrow {}^6H_{5/2}$  band. The spectra were normalised to the transition from the lowest  $m_J$  state in the ground state multiplet ( ${}^6H_{5/2}$ ) to the lowest  $m_J$  state in the first emitting state multiplet ( ${}^4G_{5/2}$ ). Orange labels indicate the numbering of the shared peaks. Right: Resolved energy levels in  ${}^6H_{5/2}$  and  ${}^4G_{5/2}$ .

However, for this sample, the crystal field splitting in the  ${}^4G_{5/2}$  state allows for a larger contribution of thermal populated emission. This further complicates the spectra. In the emission spectrum all states of  ${}^6H_{5/2}$  are resolved, but these cannot be resolved in the excitation spectrum as the spectral resolution is slightly lower. See figure 69 and S70 where the fits are provided and Table S23 and S24 where the fit parameters are provided.

Therefore, the areas from the emission is summed and the centre of emission is chosen to be 75, the average of 60 and 90. Using this interpretation, the splitting of the  ${}^6H_{5/2}$  is evaluated with the loss function similar as was done for the Na<sub>3</sub>[Sm(ODA)<sub>3</sub>]·7H<sub>2</sub>O sample. The results are visualised in Figure S71. Similarly, the (1) state is found to be degenerate, matching the already expected result obtained for the fitting of the emission spectrum in Figure S69.

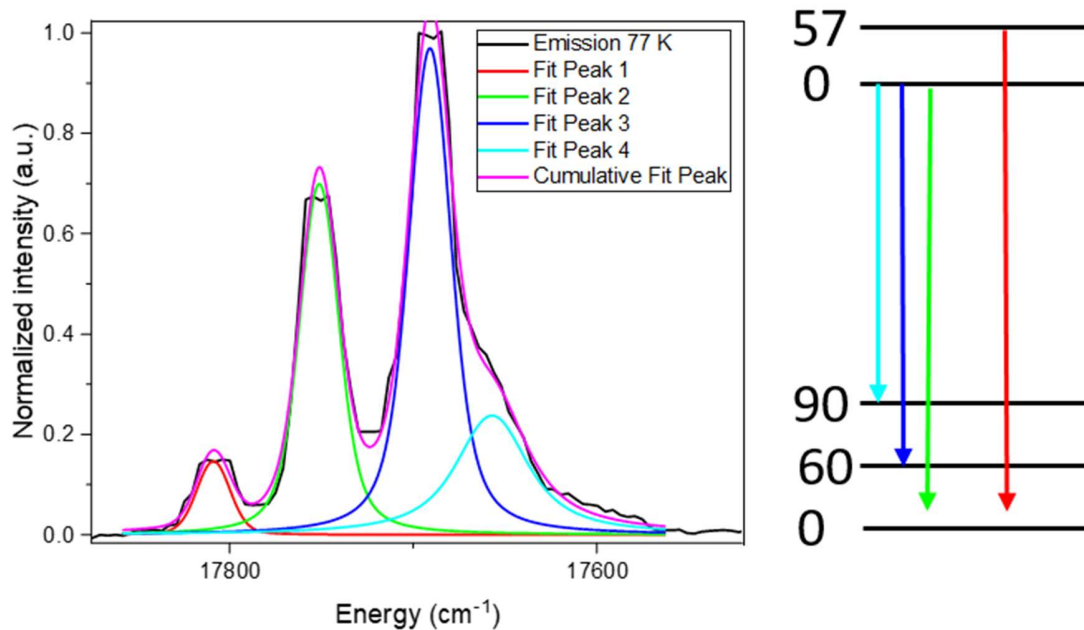

**Figure S 70:** Voigt fitting of the  ${}^4G_{5/2} \leftarrow {}^6H_{5/2}$  band in the  $\text{Cs}_3[\text{Sm}(\text{DPA})_3] \cdot 9\text{H}_2\text{O}$  emission spectra at 77 K.

|          |      | Value        | Standard Error | t-Value      | Prob> t       | Dependency |
|----------|------|--------------|----------------|--------------|---------------|------------|
| Peak1(B) | y0   | 0            | 0              | --           | --            | 0          |
|          | xc   | 17808.807523 | 1.466287       | 12145.516655 | 1.296234E-193 | 0.022352   |
|          | A    | 3.640053     | 0.697021       | 5.222301     | 2.331239E-6   | 0.677047   |
|          | wG*  | 19.234844    | 1.951762       | 9.855116     | 3.703431E-14  | 0.929935   |
|          | wL   | 4.206583     | 5.101737       | 0.824539     | 0.412899      | 0.676362   |
|          | FWHM | 21.583058    | 3.158188       |              |               |            |
|          | ymax | 0.14643      | 0.018711       |              |               |            |
| Peak2(B) | y0   | 0            | 0              | --           | --            | 0          |
|          | xc   | 17751.160081 | 0.351635       | 50481.792535 | 6.749193E-231 | 0.063616   |
|          | A    | 22.639247    | 0.902559       | 25.083412    | 1.677888E-33  | 0.729482   |
|          | wG*  | 19.234844    | 1.951762       | 9.855116     | 3.703431E-14  | 0.929935   |
|          | wL   | 10.823412    | 2.127991       | 5.086212     | 3.854374E-6   | 0.897485   |
|          | FWHM | 25.669684    | 1.109348       |              |               |            |
|          | ymax | 0.699046     | 0.018144       |              |               |            |

|          |      |              |          |             |               |          |
|----------|------|--------------|----------|-------------|---------------|----------|
| Peak3(B) | y0   | 0            | 0        | --          | --            | 0        |
|          | xc   | 17690.865645 | 0.432816 | 40873.83215 | 2.281773E-225 | 0.649894 |
|          | A    | 34.753511    | 3.02374  | 11.493552   | 8.469125E-17  | 0.972811 |
|          | wG*  | 19.234844    | 1.951762 | 9.855116    | 3.703431E-14  | 0.929935 |
|          | wL   | 13.688745    | 2.808595 | 4.873876    | 8.370152E-6   | 0.966642 |
|          | FWHM | 27.580433    | 1.243806 |             |               |          |
|          | ymax | 0.969496     | 0.03352  |             |               |          |
| Peak4(B) | y0   | 0            | 0        | --          | --            | 0        |
|          | xc   | 17657.032468 | 3.547168 | 4977.78366  | 2.665885E-170 | 0.838483 |
|          | A    | 16.365799    | 3.486003 | 4.694718    | 1.595119E-5   | 0.956327 |
|          | wG*  | 19.234844    | 1.951762 | 9.855116    | 3.703431E-14  | 0.929935 |
|          | wL   | 38.370137    | 7.672364 | 5.001084    | 5.267104E-6   | 0.86049  |
|          | FWHM | 46.759053    | 6.578574 |             |               |          |
|          | ymax | 0.237487     | 0.025174 |             |               |          |

**Table S 23:** Voight fit parameters of the  ${}^4G_{5/2} \rightarrow {}^6H_{5/2}$  band in the  $Cs_3[Sm(DPA)_3] \cdot 9H_2O$  emission spectra at 77 K.

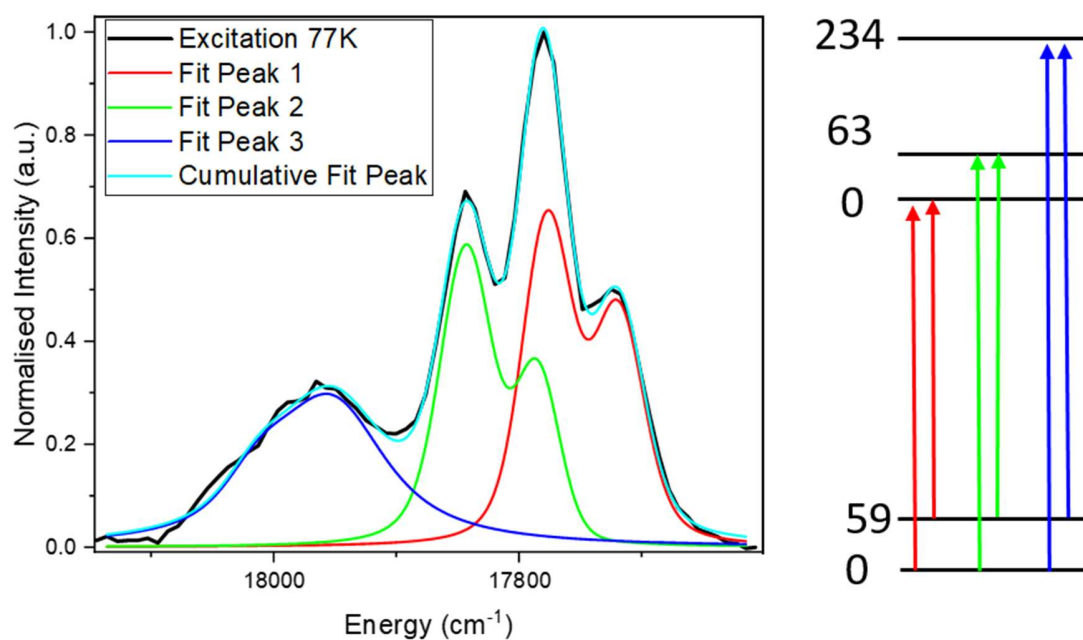

**Figure S 71:** Voigt fitting of the  ${}^4G_{5/2} \leftarrow {}^6H_{5/2}$  band in the  $\text{Cs}_3[\text{Sm}(\text{DPA})_3] \cdot 9\text{H}_2\text{O}$  excitation spectra at 77 K with two sets of two Voigt functions fitted with a shared parameter.

|          |        | Value        | Standard Error | t-Value      | Prob> t       | Dependency |
|----------|--------|--------------|----------------|--------------|---------------|------------|
| Peak1(C) | y0*    | 0            | 0              | --           | --            | 0          |
|          | Delta* | -58.780459   | 1.326807       | -44.302187   | 3.405765E-41  | 0.890433   |
|          | wG*    | 44.756484    | 3.81032        | 11.746121    | 7.39535E-16   | 0.990895   |
|          | xc1    | 17779.373352 | 19.343302      | 919.148838   | 1.682629E-105 | 0.999074   |
|          | A1     | 29.744507    | 8.291096       | 3.587524     | 7.692259E-4   | 0.998399   |
|          | wL1    | 8.687704E-16 | 8.901622E7     | 9.759686E-24 | 1             | --         |
|          | A2     | 31.313266    | 5.914108       | 5.294672     | 2.795433E-6   | 0.99516    |
|          | wL2*   | 17.034953    | 4.13481        | 4.119888     | 1.454724E-4   | 0.952176   |
| Peak2(C) | y0     | 0            | 0              | --           | --            | 0          |
|          | Delta* | -58.780459   | 1.326807       | -44.302187   | 3.405765E-41  | 0.890433   |
|          | wG*    | 44.756484    | 3.81032        | 11.746121    | 7.39535E-16   | 0.990895   |
|          | xc1    | 17842.45976  | 11.364862      | 1569.967167  | 6.525571E-117 | 0.996458   |
|          | A1     | 35.218887    | 19.324358      | 1.822513     | 0.074482      | 0.999603   |



|          |        |            |           |             |               |          |
|----------|--------|------------|-----------|-------------|---------------|----------|
|          | wL1    | 10.253762  | 14.654039 | 0.699723    | 0.487409      | 0.997827 |
|          | A2     | 15.80605   | 17.565622 | 0.899829    | 0.372613      | 0.999596 |
|          | wL2*   | 4.285784   | 33.029872 | 0.129755    | 0.897292      | 0.998498 |
| Peak3(C) | y0     | 0          | 0         | --          | --            | 0        |
|          | Delta* | -58.780459 | 1.326807  | -44.302187  | 3.405765E-41  | 0.890433 |
|          | wG*    | 44.756484  | 3.81032   | 11.746121   | 7.39535E-16   | 0.990895 |
|          | xc1    | 17990      | 7.488532  | 2402.339879 | 5.529525E-126 | 0.966395 |
|          | A1     | 27.930153  | 6.589692  | 4.238461    | 9.911423E-5   | 0.990098 |
|          | wL1    | 74.65384   | 20.978402 | 3.558605    | 8.395423E-4   | 0.978381 |
|          | A2     | 27.06199   | 8.752826  | 3.0918      | 0.003279      | 0.994075 |
|          | wL2*   | 78.490868  | 51.160237 | 1.534216    | 0.131409      | 0.995551 |

**Table S 24:** Voigt fit parameters of the  ${}^4G_{5/2} \leftarrow {}^6H_{5/2}$  band in the  $Cs_3[Sm(DPA)_3] \cdot 9H_2O$  excitation spectra at 77 K.

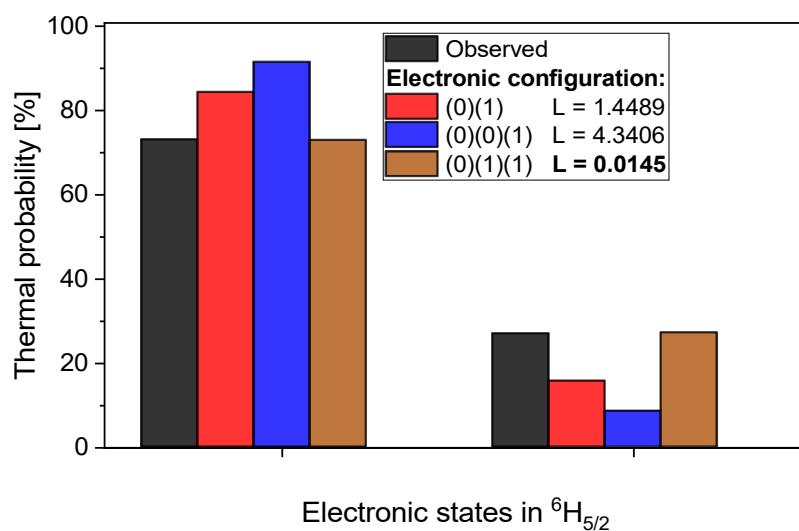

**Figure S 72:** Thermal populations of the electronic states in  ${}^6H_{5/2}$  for  $Cs_3[Sm(DPA)_3] \cdot 9H_2O$ .

## 5.5 Electronic Energy Levels for the Sm<sup>3+</sup> Compounds

The electronic energy levels determined from the Boltzmann population analysis of the excitation and emission spectra.

**Table S 25:** Electronic energy levels (cm<sup>-1</sup>) for the Sm<sup>3+</sup> compounds determined from the spectra.

|                               | Na <sub>3</sub> [Sm(ODA) <sub>3</sub> ]·7H <sub>2</sub> O | Cs <sub>3</sub> [Sm(DPA) <sub>3</sub> ]·9H <sub>2</sub> O | Na[Sm(DOTA)(H <sub>2</sub> O)]·4H <sub>2</sub> O | Na[Sm(EDTA)(H <sub>2</sub> O) <sub>3</sub> ]·5H <sub>2</sub> O |
|-------------------------------|-----------------------------------------------------------|-----------------------------------------------------------|--------------------------------------------------|----------------------------------------------------------------|
| <sup>6</sup> H <sub>5/2</sub> | 0                                                         | 0                                                         | 0                                                | 0                                                              |
|                               | 2x90                                                      | 2x59                                                      | 244                                              | 110                                                            |
|                               | -                                                         | -                                                         | 296                                              | 202                                                            |
| <sup>4</sup> G <sub>5/2</sub> | 17834                                                     | 17779                                                     | 17749                                            | 17832                                                          |
|                               | 18000                                                     | 17842                                                     | 17927                                            | 17940                                                          |
|                               | 18050                                                     | 18013                                                     | 18001                                            | 18054                                                          |

## 6 References

- 1 Brayshaw, P. A. *et al.* Synthetic, Structural, and Spectroscopic Studies on Solids Containing Tris(dipicolinato) Rare Earth Anions and Transition or Main Group Metal Cations. *Inorganic Chemistry* **34**, 2068-2076, doi:10.1021/ic00112a019 (1995).
- 2 Thomsen, M. S., Anker, A. S., Kacenauskaite, L. & Sørensen, T. J. We Are Never Ever Getting (back to) Ideal Symmetry: Structure and Luminescence in a Ten-Coordinated Europium (III) Sulfate Crystal. (2022).
